# Supplementary material for: Quantitative proteomics reveals oxygen-induced adaptations in Caldalkalibacillus thermarum TA2.A1 microaerobic chemostat cultures
Source: Front Microbiol. 2024 Oct 28;15:1468929. doi: 10.3389/fmicb.2024.1468929 (PMC11551716; doi:10.3389/fmicb.2024.1468929)
Supplement: Supplementary file 2 [file Table_1.XLSX]

## Sheet: PeaksQ summary
Protein Group	Protein ID	Accession	Statistical significance protein abundance changes -10log(p)	protein sequence coverage (%)	#Peptides, total	#Unique peptides	1_2 Area	3_4 Area	5_6 Area	7_8 Area	9_x10 Area	1_2 Area (top-3 peptides)	3_4 Area (top-3 peptides)	5_6 Area (top-3 peptides)	7_8 Area (top-3 peptides)	9_x10 Area (top-3 peptides)	Group Profile (Ratios=1:2:3:4:5)	Avg. Mass	Description
1016	315	QZT32948.1	111.13	11	7	6	6650000	15600000	11800000	11200000	92000000	5320000	12600000	8100000	7990000	69600000	1.00:2.37:1.52:1.50:13.08	69918	cytochrome c oxidase subunit I [Caldalkalibacillus thermarum TA2.A1]
261	106	QZT34177.1	99.45	69	17	17	165000000	177000000	174000000	163000000	109000000	77300000	79600000	80300000	71900000	43400000	1.00:1.03:1.04:0.93:0.56	43211	UDP-N-acetylglucosamine 2-epimerase (non-hydrolyzing) [Caldalkalibacillus thermarum TA2.A1]
846	233	QZT32733.1	91.12	34	5	5	80300000	106000000	39700000	48100000	30000000	58900000	80800000	33100000	36400000	22900000	1.00:1.37:0.56:0.62:0.39	24758	zinc metallopeptidase [Caldalkalibacillus thermarum TA2.A1]
428	141	QZT32949.1	88.39	41	8	8	20100000	35600000	27800000	22200000	171000000	12800000	24500000	19800000	16400000	122000000	1.00:1.91:1.54:1.28:9.52	38013	cytochrome c oxidase subunit II [Caldalkalibacillus thermarum TA2.A1]
597	685	QZT34610.1	82.51	84	10	10	416000000	466000000	366000000	264000000	139000000	264000000	278000000	223000000	184000000	88900000	1.00:1.06:0.85:0.70:0.34	17737	5-(carboxyamino)imidazole ribonucleotide mutase [Caldalkalibacillus thermarum TA2.A1]
375	206	QZT33243.1	82.36	41	8	8	1250000000	695000000	349000000	479000000	49900000	709000000	384000000	210000000	298000000	30500000	1.00:0.54:0.30:0.42:0.04	17901	Cys-tRNA(Pro) deacylase [Caldalkalibacillus thermarum TA2.A1]
172	50	QZT33193.1	80.31	50	15	15	2200000000	2050000000	1160000000	1330000000	242000000	844000000	814000000	432000000	555000000	95000000	1.00:0.97:0.51:0.66:0.11	37090	electron transfer flavoprotein subunit alpha/FixB family protein [Caldalkalibacillus thermarum TA2.A1]
93	56	QZT34248.1	79.9	79	24	24	6270000000	8650000000	4270000000	4630000000	768000000	1850000000	2590000000	1350000000	1610000000	238000000	1.00:1.40:0.73:0.87:0.13	39789	alanine dehydrogenase [Caldalkalibacillus thermarum TA2.A1]
360	77	QZT33744.1	79.21	38	8	8	6110000	14600000	94200000	121000000	348000000	4270000	9840000	57200000	80600000	231000000	1.00:2.31:13.41:18.88:54.04	28376	metal ABC transporter ATP-binding protein [Caldalkalibacillus thermarum TA2.A1]
583	103	QZT34685.1	77.72	40	7	7	18300000	15400000	33700000	30100000	33400000	14900000	12100000	28500000	25700000	26800000	1.00:0.81:1.91:1.72:1.79	28491	(Fe-S)-binding protein [Caldalkalibacillus thermarum TA2.A1]
397	2854	QZT33773.1	77.18	47	9	9	42600000	44500000	27900000	42800000	13400000	23200000	24500000	13800000	20100000	6630000	1.00:1.06:0.59:0.87:0.29	33302	dihydrodipicolinate synthase family protein [Caldalkalibacillus thermarum TA2.A1]
441	6783	QZT34384.1	76.74	21	5	5	86200000	52600000	12800000	14900000	7230000	72200000	43500000	10200000	11500000	6000000	1.00:0.60:0.14:0.16:0.08	31156	carboxylating nicotinate-nucleotide diphosphorylase [Caldalkalibacillus thermarum TA2.A1]
24	94	QZT33399.1	75.52	61	32	32	614000000	759000000	749000000	684000000	1260000000	177000000	221000000	265000000	265000000	441000000	1.00:1.25:1.50:1.50:2.49	66621	molecular chaperone DnaK [Caldalkalibacillus thermarum TA2.A1]
658	932	QZT35295.1	74.88	26	6	6	3680000	4120000	17400000	17200000	14200000	2790000	3050000	13600000	13700000	11300000	1.00:1.09:4.86:4.91:4.07	35804	LLM class oxidoreductase [Caldalkalibacillus thermarum TA2.A1]
402	9690	QZT33328.1	74.48	16	5	5	4360000	2620000	37200000	10900000	175000000	3650000	2140000	24000000	7370000	122000000	1.00:0.59:6.57:2.02:33.51	41569	extracellular solute-binding protein [Caldalkalibacillus thermarum TA2.A1]
499	100	QZT34989.1	74.07	44	10	10	220000000	218000000	237000000	199000000	567000000	135000000	138000000	154000000	123000000	347000000	1.00:1.03:1.14:0.91:2.58	34099	phosphate/phosphite/phosphonate ABC transporter substrate-binding protein [Caldalkalibacillus thermarum TA2.A1]
634	461	QZT34587.1	73.05	38	7	7	356000000	431000000	251000000	197000000	98200000	236000000	296000000	166000000	115000000	62100000	1.00:1.25:0.70:0.49:0.26	17562	MogA/MoaB family molybdenum cofactor biosynthesis protein [Caldalkalibacillus thermarum TA2.A1]
549	1816	QZT35230.1	72.91	17	3	3	30800000	28600000	14200000	15600000	1900000	30800000	28600000	14200000	15600000	1900000	1.00:0.93:0.46:0.50:0.06	27391	metallophosphatase family protein [Caldalkalibacillus thermarum TA2.A1]
466	878	QZT34104.1	72.11	28	8	8	44700000	42900000	66600000	49100000	7260000	22300000	20300000	39200000	30800000	4060000	1.00:0.91:1.76:1.38:0.18	47120	Zn-dependent hydrolase [Caldalkalibacillus thermarum TA2.A1]
227	2125	QZT33285.1	71.87	66	14	14	206000000	159000000	93100000	81400000	82500000	99800000	87200000	46800000	40100000	39200000	1.00:0.87:0.47:0.40:0.39	28624	oxygen-insensitive NADPH nitroreductase [Caldalkalibacillus thermarum TA2.A1]
598	529	QZT33190.1	70.8	46	7	7	545000000	611000000	384000000	686000000	94600000	269000000	310000000	178000000	317000000	43500000	1.00:1.15:0.66:1.18:0.16	24281	molybdenum cofactor guanylyltransferase [Caldalkalibacillus thermarum TA2.A1]
985	1528	QZT32462.1	70.74	21	5	5	4140000	4230000	9530000	5420000	50900000	3270000	3320000	7290000	4300000	36800000	1.00:1.01:2.23:1.32:11.25	22986	O-methyltransferase [Caldalkalibacillus thermarum TA2.A1]
967	1561	QZT33650.1	69.8	37	4	4	51100000	70600000	64800000	118000000	148000000	46600000	65600000	59900000	111000000	143000000	1.00:1.41:1.29:2.38:3.07	16234	hypothetical protein HUR95_15695 [Caldalkalibacillus thermarum TA2.A1]
1140	668	QZT34419.1	69.75	53	7	7	362000000	335000000	226000000	279000000	100000000	305000000	289000000	192000000	233000000	89200000	1.00:0.95:0.63:0.76:0.29	11738	30S ribosomal protein S10 [Caldalkalibacillus thermarum TA2.A1]
382	78	QZT33611.1	69.74	61	16	16	79300000	99800000	130000000	138000000	118000000	24900000	36000000	55300000	65500000	56000000	1.00:1.45:2.22:2.63:2.25	36476	helix-turn-helix transcriptional regulator [Caldalkalibacillus thermarum TA2.A1]
538	2442	QZT32600.1	69.57	7	3	3	2050000	1590000	8690000	6600000	25700000	2050000	1590000	8690000	6600000	25700000	1.00:0.78:4.24:3.22:12.53	42215	alanine--glyoxylate aminotransferase family protein [Caldalkalibacillus thermarum TA2.A1]
44	162	QZT33628.1	69.48	62	28	28	817000000	764000000	703000000	527000000	427000000	243000000	219000000	189000000	145000000	119000000	1.00:0.90:0.78:0.60:0.49	73056	transketolase [Caldalkalibacillus thermarum TA2.A1]
1566	2767	QZT34405.1	69.47	45	2	2	59100000	35500000	65400000	91000000	127000000	59000000	35500000	65400000	90900000	127000000	1.00:0.60:1.11:1.54:2.15	5920	50S ribosomal protein L33 [Caldalkalibacillus thermarum TA2.A1]
456	317	QZT34447.1	69.07	64	8	8	263000000	196000000	96600000	86200000	116000000	117000000	88300000	43800000	40500000	52900000	1.00:0.76:0.38:0.35:0.45	13919	30S ribosomal protein S11 [Caldalkalibacillus thermarum TA2.A1]
925	6577	QZT35453.1	67.54	73	6	6	59800000	43200000	15400000	22200000	14800000	44800000	34000000	10700000	15900000	11300000	1.00:0.76:0.24:0.35:0.25	11119	YlaN family protein [Caldalkalibacillus thermarum TA2.A1]
265	1274	QZT32698.1	67.31	50	10	10	49700000	46000000	151000000	132000000	226000000	24500000	22500000	82500000	73000000	114000000	1.00:0.92:3.37:2.99:4.66	32749	D-amino-acid transaminase [Caldalkalibacillus thermarum TA2.A1]
946	490	QZT32864.1	66.56	29	5	5	12200000	11300000	15000000	12700000	44000000	9220000	8870000	11100000	9020000	32100000	1.00:0.96:1.21:0.98:3.48	33055	fructosamine kinase family protein [Caldalkalibacillus thermarum TA2.A1]
64	110	QZT35416.1	66.12	72	23	18	245000000	225000000	835000000	670000000	1440000000	96800000	89700000	334000000	278000000	563000000	1.00:0.93:3.45:2.87:5.82	48908	type I glutamate--ammonia ligase [Caldalkalibacillus thermarum TA2.A1]
204	217	QZT35027.1	66.03	6	2	2	11500000	13500000	2890000	7620000	584000	11500000	13500000	2890000	7620000	584000	1.00:1.18:0.25:0.66:0.05	80358	heavy metal translocating P-type ATPase [Caldalkalibacillus thermarum TA2.A1]
263	72	QZT33832.1	65.97	73	16	16	162000000	395000000	479000000	541000000	788000000	73300000	188000000	227000000	235000000	347000000	1.00:2.57:3.09:3.21:4.74	26510	precorrin-2 C(20)-methyltransferase [Caldalkalibacillus thermarum TA2.A1]
159	33	QZT33194.1	65.92	63	14	14	2450000000	2280000000	1130000000	1400000000	252000000	1330000000	1260000000	604000000	764000000	145000000	1.00:0.95:0.46:0.58:0.11	30316	electron transfer flavoprotein subunit beta/FixA family protein [Caldalkalibacillus thermarum TA2.A1]
705	98	QZT33824.1	65.61	36	8	8	53300000	102000000	87800000	84900000	177000000	37600000	69400000	59800000	60400000	129000000	1.00:1.85:1.59:1.61:3.42	38156	ABC transporter substrate-binding protein [Caldalkalibacillus thermarum TA2.A1]
1064	801	QZT33643.1	65.61	24	3	3	6850000	28700000	14000000	15200000	366000000	6850000	28700000	14000000	15200000	366000000	1.00:4.19:2.04:2.21:53.47	15271	metalloregulator ArsR/SmtB family transcription factor [Caldalkalibacillus thermarum TA2.A1]
1374	403	QZT33422.1	64.98	3	2	2	1860000	2730000	2230000	1520000	9120000	1860000	2730000	2230000	1520000	9120000	1.00:1.47:1.20:0.82:4.89	89177	Na+/H+ antiporter subunit A [Caldalkalibacillus thermarum TA2.A1]
229	715	QZT32993.1	64.75	65	10	10	1250000000	803000000	439000000	662000000	88800000	748000000	485000000	253000000	383000000	52500000	1.00:0.65:0.34:0.51:0.07	20938	ribosome recycling factor [Caldalkalibacillus thermarum TA2.A1]
186	1748	QZT32528.1	64.13	67	14	14	469000000	344000000	261000000	214000000	172000000	215000000	167000000	128000000	107000000	83300000	1.00:0.78:0.59:0.50:0.39	33637	cysteine synthase A [Caldalkalibacillus thermarum TA2.A1]
84	679	QZT33883.1	63.52	62	20	20	265000000	371000000	489000000	228000000	218000000	80500000	117000000	184000000	88700000	95500000	1.00:1.46:2.29:1.10:1.19	57207	2 3-bisphosphoglycerate-independent phosphoglycerate mutase [Caldalkalibacillus thermarum TA2.A1]
641	6555	QZT33099.1	63.44	20	5	5	13100000	14400000	14200000	18900000	23700000	9190000	9760000	10500000	14900000	18400000	1.00:1.06:1.14:1.62:2.00	30573	peptidoglycan editing factor PgeF [Caldalkalibacillus thermarum TA2.A1]
127	575	QZT34095.1	63.26	60	18	18	406000000	605000000	633000000	582000000	833000000	206000000	310000000	366000000	341000000	489000000	1.00:1.51:1.78:1.66:2.38	53005	extracellular solute-binding protein [Caldalkalibacillus thermarum TA2.A1]
330	294	QZT35458.1	63.08	51	14	14	228000000	190000000	142000000	141000000	152000000	106000000	91200000	71800000	73900000	80500000	1.00:0.86:0.68:0.70:0.76	43229	glycine oxidase ThiO [Caldalkalibacillus thermarum TA2.A1]
965	2648	QZT34046.1	62.9	11	3	3	5420000	8240000	9290000	9710000	1440000	5420000	8240000	9290000	9710000	1440000	1.00:1.52:1.72:1.79:0.26	33975	GDP-mannose 4 6-dehydratase [Caldalkalibacillus thermarum TA2.A1]
467	2810	QZT34369.1	62.16	34	6	6	6510000	8300000	14700000	13600000	18300000	5240000	6000000	12200000	11900000	15600000	1.00:1.14:2.33:2.26:2.98	32449	Hsp33 family molecular chaperone HslO [Caldalkalibacillus thermarum TA2.A1]
166	58	QZT34313.1	62.07	84	18	18	1350000000	1440000000	1310000000	1500000000	656000000	474000000	536000000	535000000	659000000	297000000	1.00:1.13:1.13:1.39:0.63	31747	pyridoxal 5'-phosphate synthase lyase subunit PdxS [Caldalkalibacillus thermarum TA2.A1]
526	743	QZT32487.1	62.04	25	5	5	4810000	4780000	6680000	4120000	21600000	3930000	3790000	4840000	2810000	14400000	1.00:0.96:1.23:0.72:3.67	42535	o-succinylbenzoate synthase [Caldalkalibacillus thermarum TA2.A1]
839	12752	QZT34652.1	61.95	25	2	2	14600000	13700000	4260000	5170000	2260000	14600000	13700000	4260000	5170000	2260000	1.00:0.94:0.29:0.35:0.15	11009	Asp-tRNA(Asn)/Glu-tRNA(Gln) amidotransferase subunit GatC [Caldalkalibacillus thermarum TA2.A1]
311	405	QZT33114.1	61.62	41	12	12	28200000	37800000	39200000	24200000	93600000	9310000	13500000	14100000	9220000	37800000	1.00:1.45:1.52:0.99:4.06	49380	UDP-N-acetylmuramoyl-L-alanine--D-glutamate ligase [Caldalkalibacillus thermarum TA2.A1]
419	1316	QZT35266.1	61.49	39	8	8	74400000	85200000	63100000	98800000	29200000	51500000	59000000	37700000	56200000	17100000	1.00:1.15:0.73:1.09:0.33	30546	TatD family hydrolase [Caldalkalibacillus thermarum TA2.A1]
21	1	QZT33192.1	61.48	72	27	22	3570000000	3500000000	2130000000	2250000000	465000000	1130000000	1150000000	772000000	909000000	206000000	1.00:1.02:0.68:0.81:0.18	48051	FAD-dependent oxidoreductase [Caldalkalibacillus thermarum TA2.A1]
699	499	QZT34434.1	61.15	61	7	7	233000000	182000000	142000000	171000000	164000000	185000000	148000000	114000000	135000000	128000000	1.00:0.80:0.61:0.73:0.69	14920	30S ribosomal protein S8 [Caldalkalibacillus thermarum TA2.A1]
252	665	QZT32651.1	60.66	44	16	15	341000000	326000000	192000000	189000000	295000000	234000000	224000000	102000000	82300000	136000000	1.00:0.96:0.44:0.35:0.58	50079	acetyl-CoA carboxylase biotin carboxylase subunit [Caldalkalibacillus thermarum TA2.A1]
751	542	QZT34170.1	60.4	21	3	3	68500000	91300000	71300000	52700000	13800000	68500000	91300000	71300000	52700000	13800000	1.00:1.33:1.04:0.77:0.20	19617	F0F1 ATP synthase subunit B [Caldalkalibacillus thermarum TA2.A1]
301	846	QZT34971.1	60.3	16	3	3	4540000	3890000	48600000	71500000	65200000	4540000	3890000	48600000	71500000	65200000	1.00:0.86:10.71:15.77:14.37	38039	ketol-acid reductoisomerase [Caldalkalibacillus thermarum TA2.A1]
483	160	QZT33831.1	60.28	48	9	9	77100000	199000000	282000000	299000000	686000000	54500000	136000000	178000000	175000000	403000000	1.00:2.50:3.26:3.21:7.40	28556	precorrin-4 C(11)-methyltransferase [Caldalkalibacillus thermarum TA2.A1]
580	19040	QZT35103.1	59.64	79	12	12	548000000	483000000	638000000	614000000	243000000	348000000	315000000	405000000	381000000	151000000	1.00:0.90:1.16:1.10:0.43	20997	phosphate propanoyltransferase [Caldalkalibacillus thermarum TA2.A1]
321	25	QZT33835.1	59.22	86	13	13	487000000	1560000000	2180000000	2620000000	4870000000	204000000	663000000	1040000000	1320000000	2550000000	1.00:3.26:5.12:6.49:12.54	23307	precorrin-8X methylmutase [Caldalkalibacillus thermarum TA2.A1]
436	432	QZT32722.1	59.16	27	5	5	8340000	10600000	21300000	28600000	48200000	7150000	9110000	17700000	23500000	38100000	1.00:1.27:2.48:3.29:5.32	40926	histidinol-phosphate transaminase [Caldalkalibacillus thermarum TA2.A1]
1306	25181	QZT34481.1	58.92	18	3	3	21200000	17900000	65500000	53000000	73200000	20600000	17700000	64600000	52400000	72100000	1.00:0.86:3.13:2.54:3.50	19304	gamma carbonic anhydrase family protein [Caldalkalibacillus thermarum TA2.A1]
1077	1496	QZT33735.1	58.71	71	5	5	923000000	565000000	339000000	752000000	373000000	782000000	490000000	309000000	681000000	339000000	1.00:0.63:0.40:0.87:0.43	8584	NifU family protein [Caldalkalibacillus thermarum TA2.A1]
65	1033	QZT32987.1	58.69	3	4	4	5530000	5780000	4350000	2030000	4720000	4910000	5120000	3860000	1600000	3970000	1.00:1.04:0.79:0.33:0.81	163915	PolC-type DNA polymerase III [Caldalkalibacillus thermarum TA2.A1]
871	805	QZT32977.1	58.67	40	4	4	163000000	123000000	79500000	69100000	102000000	154000000	117000000	75300000	64500000	94600000	1.00:0.76:0.49:0.42:0.62	10873	30S ribosomal protein S15 [Caldalkalibacillus thermarum TA2.A1]
729	9691	QZT32519.1	58.47	38	6	6	44500000	37600000	49100000	41200000	72000000	36000000	29700000	37000000	31800000	54300000	1.00:0.83:1.03:0.88:1.51	31293	fumarylacetoacetate hydrolase family protein [Caldalkalibacillus thermarum TA2.A1]
449	298	QZT35528.1	58.18	30	8	8	23300000	27000000	23300000	12300000	5890000	16500000	19800000	15000000	7880000	3800000	1.00:1.20:0.91:0.48:0.23	38246	hypothetical protein HUR95_17075 [Caldalkalibacillus thermarum TA2.A1]
281	421	QZT33003.1	58.08	15	7	7	20900000	22500000	22800000	7590000	44300000	13300000	14600000	14600000	4990000	29100000	1.00:1.10:1.09:0.37:2.18	75985	chemotaxis protein CheA [Caldalkalibacillus thermarum TA2.A1]
7	85	QZT34413.1	58.04	45	42	42	545000000	583000000	519000000	432000000	389000000	96900000	98300000	96900000	79200000	70800000	1.00:1.01:1.00:0.82:0.73	131903	DNA-directed RNA polymerase subunit beta [Caldalkalibacillus thermarum TA2.A1]
430	550	QZT35094.1	57.52	42	12	12	95800000	80500000	44500000	57300000	27000000	33900000	29700000	16700000	21400000	9000000	1.00:0.87:0.49:0.63:0.27	40524	Xaa-Pro peptidase family protein [Caldalkalibacillus thermarum TA2.A1]
765	3825	QZT33380.1	57.37	26	3	3	199000000	129000000	20200000	29200000	8720000	199000000	129000000	20200000	29200000	8720000	1.00:0.65:0.10:0.15:0.04	16547	GatB/YqeY domain-containing protein [Caldalkalibacillus thermarum TA2.A1]
544	6730	QZT35451.1	57.16	52	6	6	78400000	100000000	52400000	48700000	28900000	53500000	72300000	34100000	29900000	16700000	1.00:1.35:0.64:0.56:0.31	25974	hydroxyethylthiazole kinase [Caldalkalibacillus thermarum TA2.A1]
489	166	QZT35091.1	56.95	28	7	7	9730000	10100000	11700000	10100000	17900000	5550000	6000000	7020000	6390000	11100000	1.00:1.08:1.27:1.15:2.00	42330	cysteine desulfurase [Caldalkalibacillus thermarum TA2.A1]
235	11	QZT33520.1	56.63	73	19	19	115000000	164000000	147000000	95600000	323000000	36100000	55900000	50100000	33900000	108000000	1.00:1.55:1.39:0.94:2.99	38449	type IV pilus twitching motility protein PilT [Caldalkalibacillus thermarum TA2.A1]
472	398	QZT34439.1	56.44	50	8	8	106000000	87900000	57400000	54200000	39900000	83300000	71500000	45300000	40500000	29700000	1.00:0.86:0.54:0.49:0.36	15726	50S ribosomal protein L15 [Caldalkalibacillus thermarum TA2.A1]
98	60	QZT33828.1	56.42	85	19	19	571000000	1400000000	1870000000	1940000000	3750000000	315000000	744000000	1040000000	1100000000	1910000000	1.00:2.36:3.30:3.50:6.05	38268	nicotinate-nucleotide--dimethylbenzimidazole phosphoribosyltransferase [Caldalkalibacillus thermarum TA2.A1]
931	244	QZT32828.1	56.18	10	3	3	7290000	6220000	2580000	3290000	2520000	7290000	6220000	2580000	3290000	2520000	1.00:0.85:0.35:0.45:0.35	32240	ribosome biogenesis GTPase YlqF [Caldalkalibacillus thermarum TA2.A1]
651	321	QZT33834.1	55.91	17	4	4	2410000	11500000	16800000	15200000	30900000	2250000	10300000	14700000	13500000	27000000	1.00:4.58:6.53:6.01:12.02	41870	cobalt-precorrin-5B (C(1))-methyltransferase [Caldalkalibacillus thermarum TA2.A1]
373	302	QZT35469.1	55.74	62	13	13	179000000	164000000	174000000	194000000	329000000	81300000	77000000	80100000	98500000	162000000	1.00:0.95:0.99:1.21:1.99	30405	kinase/pyrophosphorylase [Caldalkalibacillus thermarum TA2.A1]
343	519	QZT34991.1	55.69	43	13	13	58700000	59000000	66300000	67500000	143000000	28100000	30300000	37900000	36500000	76400000	1.00:1.08:1.35:1.30:2.72	39112	phenylalanine--tRNA ligase subunit alpha [Caldalkalibacillus thermarum TA2.A1]
523	3945	QZT33518.1	55.62	43	6	6	37000000	55400000	160000000	70900000	279000000	32900000	52500000	143000000	61600000	234000000	1.00:1.60:4.35:1.87:7.10	16455	prepilin-type N-terminal cleavage/methylation domain-containing protein [Caldalkalibacillus thermarum TA2.A1]
86	314	QZT32599.1	55.28	41	14	14	21900000	18700000	54200000	48100000	189000000	9430000	8640000	23400000	21400000	77400000	1.00:0.92:2.48:2.27:8.21	57697	phosphoglycerate dehydrogenase [Caldalkalibacillus thermarum TA2.A1]
554	143	QZT34990.1	55.22	25	4	4	9270000	6930000	8150000	8970000	17900000	7250000	5600000	7370000	8250000	15900000	1.00:0.77:1.02:1.14:2.19	27683	phosphonate ABC transporter ATP-binding protein [Caldalkalibacillus thermarum TA2.A1]
519	350	QZT35290.1	55.08	30	5	5	38200000	44900000	34400000	23800000	16900000	36100000	42500000	31400000	20800000	15200000	1.00:1.18:0.87:0.58:0.42	24503	redox-sensing transcriptional repressor Rex [Caldalkalibacillus thermarum TA2.A1]
297	513	QZT34843.1	55.04	53	11	11	234000000	188000000	125000000	149000000	101000000	157000000	127000000	83300000	93200000	65700000	1.00:0.81:0.53:0.59:0.42	25014	molybdopterin-dependent oxidoreductase [Caldalkalibacillus thermarum TA2.A1]
756	435	QZT34702.1	54.67	43	4	4	37900000	14300000	24700000	22700000	7290000	33400000	12700000	22100000	20500000	6840000	1.00:0.38:0.66:0.61:0.20	15646	glycine/betaine/sarcosine/D-proline family reductase selenoprotein B [Caldalkalibacillus thermarum TA2.A1]
399	3539	QZT32578.1	54.18	42	8	8	514000000	531000000	147000000	99600000	171000000	364000000	399000000	99800000	53400000	93000000	1.00:1.10:0.27:0.15:0.26	26365	thiaminase II [Caldalkalibacillus thermarum TA2.A1]
217	214	QZT34259.1	54.11	54	17	17	455000000	400000000	263000000	260000000	86400000	170000000	151000000	100000000	97100000	35300000	1.00:0.89:0.59:0.57:0.21	47304	adenylosuccinate synthase [Caldalkalibacillus thermarum TA2.A1]
1595	12772	QZT33762.1	54.02	8	2	2	20200000	34700000	23800000	8140000	8520000	20200000	34700000	23800000	8140000	8520000	1.00:1.72:1.18:0.40:0.42	32010	MetQ/NlpA family ABC transporter substrate-binding protein [Caldalkalibacillus thermarum TA2.A1]
133	278	QZT34204.1	54.01	27	15	15	21600000	20500000	33600000	28000000	37900000	11400000	10500000	15700000	12200000	16800000	1.00:0.92:1.38:1.07:1.48	86628	DEAD/DEAH box helicase [Caldalkalibacillus thermarum TA2.A1]
999	3056	QZT34381.1	53.73	13	2	2	11300000	5880000	916000	1120000	426000	11300000	5880000	916000	1120000	426000	1.00:0.52:0.08:0.10:0.04	20331	transcription repressor NadR [Caldalkalibacillus thermarum TA2.A1]
530	963	QZT35400.1	53.61	31	7	7	55700000	58500000	42500000	26200000	18700000	45700000	45200000	33200000	19300000	13900000	1.00:0.99:0.73:0.42:0.30	30799	L-serine ammonia-lyase iron-sulfur-dependent subunit alpha [Caldalkalibacillus thermarum TA2.A1]
516	717	QZT35345.1	53.59	22	5	5	3640000	3610000	54500000	87900000	85900000	3080000	3140000	42500000	70400000	68300000	1.00:1.02:13.77:22.81:22.15	32749	branched-chain-amino-acid transaminase [Caldalkalibacillus thermarum TA2.A1]
4	245	QZT32699.1	53.49	61	41	41	626000000	1080000000	2230000000	1660000000	3140000000	187000000	331000000	562000000	449000000	757000000	1.00:1.77:3.00:2.40:4.04	97378	vitamin B12-dependent ribonucleotide reductase [Caldalkalibacillus thermarum TA2.A1]
387	1011	QZT35480.1	53.25	50	12	12	597000000	577000000	542000000	676000000	435000000	323000000	316000000	273000000	323000000	196000000	1.00:0.98:0.85:1.00:0.61	27729	NAD(+) synthase [Caldalkalibacillus thermarum TA2.A1]
381	669	QZT32795.1	53.17	65	16	16	165000000	146000000	190000000	211000000	246000000	65200000	58300000	86400000	94300000	112000000	1.00:0.89:1.33:1.45:1.72	23927	guanylate kinase [Caldalkalibacillus thermarum TA2.A1]
1367	3896	QZT35115.1	53.02	30	3	3	28800000	19600000	16900000	15700000	12100000	28800000	19600000	16900000	15700000	12100000	1.00:0.68:0.59:0.54:0.42	16805	hypothetical protein HUR95_07830 [Caldalkalibacillus thermarum TA2.A1]
759	512	QZT33201.1	52.92	22	2	2	186000000	123000000	37200000	75700000	12200000	186000000	123000000	37200000	75700000	12200000	1.00:0.66:0.20:0.41:0.07	12254	hypothetical protein HUR95_12975 [Caldalkalibacillus thermarum TA2.A1]
723	1742	QZT35392.1	52.73	12	2	2	3150000	2760000	1520000	2530000	4380000	3150000	2760000	1520000	2530000	4380000	1.00:0.88:0.48:0.81:1.39	30272	bacillithiol biosynthesis deacetylase BshB1 [Caldalkalibacillus thermarum TA2.A1]
832	28264	QZT35366.1	52.37	23	4	4	3310000	4260000	4600000	2830000	11100000	2900000	3740000	4180000	2490000	9920000	1.00:1.29:1.44:0.86:3.42	31615	GNAT family N-acetyltransferase [Caldalkalibacillus thermarum TA2.A1]
283	500	QZT35101.1	52.11	50	11	11	122000000	112000000	105000000	77300000	25900000	53300000	51900000	50400000	39300000	13000000	1.00:0.97:0.95:0.74:0.24	37490	class I SAM-dependent methyltransferase [Caldalkalibacillus thermarum TA2.A1]
758	204	QZT34163.1	51.89	60	7	7	151000000	144000000	130000000	151000000	61900000	110000000	107000000	101000000	121000000	50500000	1.00:0.97:0.92:1.11:0.46	19183	NADH-quinone oxidoreductase subunit B [Caldalkalibacillus thermarum TA2.A1]
114	229	QZT35069.1	51.44	35	12	12	53300000	53400000	21400000	21300000	14400000	27700000	25700000	10100000	9950000	6250000	1.00:0.93:0.37:0.36:0.23	66825	septation ring formation regulator EzrA [Caldalkalibacillus thermarum TA2.A1]
254	55	QZT34162.1	51.34	42	11	11	181000000	131000000	86300000	110000000	49600000	91400000	68000000	43100000	60600000	26500000	1.00:0.74:0.47:0.66:0.29	31135	NADH-quinone oxidoreductase subunit C [Caldalkalibacillus thermarum TA2.A1]
29	31	QZT33807.1	51.16	69	30	30	2260000000	2840000000	2260000000	2000000000	898000000	636000000	738000000	577000000	499000000	216000000	1.00:1.16:0.91:0.78:0.34	56776	L-glutamate gamma-semialdehyde dehydrogenase [Caldalkalibacillus thermarum TA2.A1]
345	280	QZT33063.1	51.06	36	8	8	25400000	18900000	32300000	41100000	56900000	14800000	10500000	19900000	24600000	30700000	1.00:0.70:1.34:1.65:2.07	34410	hypothetical protein HUR95_12145 [Caldalkalibacillus thermarum TA2.A1]
974	9722	QZT32871.1	50.98	64	6	6	34300000	11300000	16800000	31000000	28500000	24300000	8090000	12400000	21400000	20800000	1.00:0.33:0.51:0.88:0.86	16966	macro domain-containing protein [Caldalkalibacillus thermarum TA2.A1]
867	37782	QZT32738.1	50.94	8	3	3	1920000	2030000	2840000	1470000	5320000	1920000	2030000	2840000	1470000	5320000	1.00:1.06:1.48:0.77:2.76	46971	CCA tRNA nucleotidyltransferase [Caldalkalibacillus thermarum TA2.A1]
745	1283	QZT33504.1	50.86	14	3	3	3220000	3650000	2550000	3040000	1910000	3220000	3650000	2550000	3040000	1910000	1.00:1.14:0.79:0.95:0.60	47464	Rne/Rng family ribonuclease [Caldalkalibacillus thermarum TA2.A1]
1138	1568	QZT35269.1	50.8	18	2	2	5730000	7410000	7560000	5190000	11600000	5730000	7410000	7560000	5190000	11600000	1.00:1.29:1.32:0.90:2.02	14372	dihydroneopterin aldolase [Caldalkalibacillus thermarum TA2.A1]
1323	695	QZT32652.1	50.78	40	2	2	13800000	13600000	11000000	16400000	26200000	13800000	13600000	11000000	16400000	26200000	1.00:0.99:0.80:1.19:1.90	13897	Asp23/Gls24 family envelope stress response protein [Caldalkalibacillus thermarum TA2.A1]
507	604	QZT33419.1	50.75	6	2	2	1780000	2380000	7440000	2290000	9450000	1780000	2380000	7440000	2290000	9450000	1.00:1.34:4.18:1.29:5.31	40520	ribosome biogenesis GTPase YqeH [Caldalkalibacillus thermarum TA2.A1]
624	2711	QZT35205.1	50.67	3	2	2	2150000	1990000	2470000	1220000	8390000	2150000	1990000	2470000	1220000	8390000	1.00:0.93:1.15:0.57:3.91	68252	DUF262 domain-containing protein [Caldalkalibacillus thermarum TA2.A1]
1142	4025	QZT33497.1	50.63	18	3	3	3900000	3070000	2450000	2690000	4490000	3900000	3070000	2450000	2690000	4490000	1.00:0.79:0.63:0.69:1.15	17115	ACT domain-containing protein [Caldalkalibacillus thermarum TA2.A1]
774	666	QZT33706.1	50.54	6	3	3	1270000	2310000	2890000	4520000	5150000	1270000	2310000	2890000	4520000	5150000	1.00:1.83:2.28:3.57:4.07	54158	hypothetical protein HUR95_16025 [Caldalkalibacillus thermarum TA2.A1]
335	1442	QZT34196.1	50.52	40	13	13	35900000	51200000	81100000	77500000	84400000	13900000	17600000	35300000	34400000	36700000	1.00:1.27:2.54:2.48:2.64	59897	CTP synthase [Caldalkalibacillus thermarum TA2.A1]
267	497	QZT32855.1	50.23	59	11	11	271000000	306000000	336000000	286000000	421000000	178000000	202000000	245000000	216000000	320000000	1.00:1.13:1.38:1.21:1.80	30091	1 4-dihydroxy-2-naphthoyl-CoA synthase [Caldalkalibacillus thermarum TA2.A1]
586	3007	QZT35382.1	50.22	41	5	5	98900000	126000000	112000000	138000000	60400000	74500000	95200000	91000000	118000000	51000000	1.00:1.28:1.22:1.58:0.68	19402	acetyl-CoA carboxylase biotin carboxyl carrier protein [Caldalkalibacillus thermarum TA2.A1]
249	64	QZT34084.1	50.15	33	11	11	112000000	92400000	76300000	100000000	39100000	65400000	53700000	46400000	60100000	27800000	1.00:0.82:0.71:0.92:0.43	41463	SEC-C domain-containing protein [Caldalkalibacillus thermarum TA2.A1]
372	3084	QZT35088.1	50.13	30	6	6	9900000	17700000	19700000	18700000	41700000	6570000	12300000	14300000	13900000	30800000	1.00:1.87:2.18:2.11:4.69	28193	class I SAM-dependent methyltransferase [Caldalkalibacillus thermarum TA2.A1]
319	2994	QZT34620.1	49.88	52	15	15	141000000	136000000	151000000	101000000	69300000	68000000	63400000	78200000	54700000	37200000	1.00:0.93:1.15:0.80:0.55	46184	phosphoribosylamine--glycine ligase [Caldalkalibacillus thermarum TA2.A1]
490	407	QZT32655.1	49.55	47	9	9	100000000	118000000	106000000	85800000	56700000	60900000	72600000	61900000	59300000	34900000	1.00:1.19:1.02:0.97:0.57	31157	bifunctional methylenetetrahydrofolate dehydrogenase/methenyltetrahydrofolate cyclohydrolase FolD [Caldalkalibacillus thermarum TA2.A1]
209	816	QZT35354.1	49.43	25	6	6	6650000	9940000	13800000	9760000	16400000	4950000	7410000	11100000	8080000	12600000	1.00:1.50:2.24:1.63:2.54	48492	UDP-N-acetylmuramate--L-alanine ligase [Caldalkalibacillus thermarum TA2.A1]
1127	2153	QZT33145.1	49.08	9	2	2	897000	833000	524000	2710000	4360000	897000	833000	524000	2710000	4360000	1.00:0.93:0.58:3.02:4.86	27347	rRNA pseudouridine synthase [Caldalkalibacillus thermarum TA2.A1]
440	172	QZT33206.1	49.07	54	9	9	154000000	144000000	173000000	237000000	56600000	106000000	95100000	125000000	167000000	41900000	1.00:0.90:1.18:1.58:0.40	23047	DUF2249 domain-containing protein [Caldalkalibacillus thermarum TA2.A1]
92	115	QZT33813.1	48.99	66	19	19	999000000	861000000	303000000	162000000	276000000	338000000	288000000	114000000	71100000	114000000	1.00:0.85:0.34:0.21:0.34	47093	extracellular solute-binding protein [Caldalkalibacillus thermarum TA2.A1]
695	131	QZT34127.1	48.76	8	2	2	2650000	2400000	1740000	1610000	4700000	2650000	2400000	1740000	1610000	4700000	1.00:0.90:0.66:0.61:1.77	38369	TRAP transporter substrate-binding protein [Caldalkalibacillus thermarum TA2.A1]
232	2103	QZT34385.1	48.62	49	12	12	276000000	171000000	76700000	82300000	38600000	137000000	88500000	40900000	44500000	19800000	1.00:0.65:0.30:0.33:0.15	41374	quinolinate synthase NadA [Caldalkalibacillus thermarum TA2.A1]
366	2194	QZT33822.1	48.6	66	9	9	35100000	54400000	60900000	56200000	176000000	20600000	32000000	37000000	32700000	95600000	1.00:1.55:1.79:1.58:4.63	21611	Uma2 family endonuclease [Caldalkalibacillus thermarum TA2.A1]
1022	774	QZT34742.1	48.09	32	5	5	11400000	13200000	27800000	43600000	67400000	8370000	9340000	19300000	29600000	42600000	1.00:1.12:2.30:3.53:5.09	28113	type I-B CRISPR-associated protein Cas5b [Caldalkalibacillus thermarum TA2.A1]
416	80	QZT34182.1	48.06	33	9	9	38500000	45700000	58000000	69800000	110000000	23000000	27900000	42200000	49400000	77700000	1.00:1.22:1.84:2.15:3.38	46922	methyl-accepting chemotaxis protein [Caldalkalibacillus thermarum TA2.A1]
795	671	QZT33289.1	48.06	37	4	4	59800000	49800000	17300000	21300000	4930000	55300000	46800000	15600000	19700000	4200000	1.00:0.85:0.28:0.36:0.08	20102	metallophosphoesterase [Caldalkalibacillus thermarum TA2.A1]
1675	739	QZT34978.1	48.01	31	2	2	41000000	33200000	24800000	17900000	18600000	41000000	33200000	24800000	17900000	18600000	1.00:0.81:0.61:0.44:0.45	7661	50S ribosomal protein L35 [Caldalkalibacillus thermarum TA2.A1]
1095	86	QZT35097.1	47.98	16	4	4	10400000	7860000	9500000	9210000	24600000	8870000	6690000	7900000	7450000	20100000	1.00:0.75:0.89:0.84:2.26	35978	signal peptide peptidase SppA [Caldalkalibacillus thermarum TA2.A1]
236	540	QZT32575.1	47.83	53	11	11	518000000	453000000	196000000	198000000	817000000	222000000	197000000	100000000	111000000	432000000	1.00:0.89:0.45:0.50:1.95	24937	peroxiredoxin [Caldalkalibacillus thermarum TA2.A1]
365	117	QZT35462.1	47.72	27	7	7	337000000	349000000	121000000	60800000	133000000	237000000	230000000	85600000	42900000	86600000	1.00:0.97:0.36:0.18:0.37	33413	phosphate/phosphite/phosphonate ABC transporter substrate-binding protein [Caldalkalibacillus thermarum TA2.A1]
442	227	QZT32706.1	47.55	82	12	12	2310000000	1790000000	1270000000	1250000000	562000000	1460000000	1220000000	854000000	822000000	338000000	1.00:0.84:0.58:0.56:0.23	9721	HU family DNA-binding protein [Caldalkalibacillus thermarum TA2.A1]
156	1175	QZT33027.1	47.43	37	16	16	81200000	76200000	54400000	54000000	44400000	35400000	33200000	23000000	21900000	16800000	1.00:0.94:0.65:0.62:0.47	52937	ATP-dependent protease ATPase subunit HslU [Caldalkalibacillus thermarum TA2.A1]
939	243	QZT32806.1	47.4	31	4	4	70900000	66200000	28800000	34200000	32700000	59700000	55900000	22500000	26500000	26200000	1.00:0.94:0.38:0.44:0.44	13202	Asp23/Gls24 family envelope stress response protein [Caldalkalibacillus thermarum TA2.A1]
31	1651	QZT34753.1	47.39	53	26	26	113000000	111000000	299000000	476000000	265000000	34300000	32800000	88900000	178000000	81600000	1.00:0.96:2.59:5.20:2.38	70185	TIGR02556 family CRISPR-associated protein [Caldalkalibacillus thermarum TA2.A1]
42	5	QZT33837.1	47.36	73	28	28	379000000	939000000	1190000000	1240000000	2480000000	111000000	281000000	342000000	372000000	746000000	1.00:2.52:3.07:3.34:6.70	61590	precorrin-3B C(17)-methyltransferase [Caldalkalibacillus thermarum TA2.A1]
56	18	QZT33833.1	47.19	71	25	25	265000000	627000000	743000000	831000000	1550000000	102000000	231000000	278000000	315000000	518000000	1.00:2.26:2.71:3.07:5.05	44542	bifunctional cobalt-precorrin-7 (C(5))-methyltransferase/cobalt-precorrin-6B (C(15))-methyltransferase [Caldalkalibacillus thermarum TA2.A1]
1000	28266	QZT35028.1	47.05	72	4	4	1080000000	380000000	181000000	329000000	106000000	1010000000	360000000	170000000	312000000	101000000	1.00:0.36:0.17:0.31:0.10	7481	copper chaperone CopZ [Caldalkalibacillus thermarum TA2.A1]
15	75	QZT33320.1	46.95	43	18	18	1540000000	1080000000	180000000	345000000	79800000	508000000	344000000	64300000	115000000	26400000	1.00:0.68:0.13:0.23:0.05	66061	aldehyde ferredoxin oxidoreductase family protein [Caldalkalibacillus thermarum TA2.A1]
1098	22158	QZT33281.1	46.89	65	3	3	81600000	43500000	11700000	23800000	13600000	81600000	43500000	11700000	23800000	13600000	1.00:0.53:0.14:0.29:0.17	7477	sulfur carrier protein ThiS [Caldalkalibacillus thermarum TA2.A1]
107	144	QZT34194.1	46.76	80	21	21	2390000000	2620000000	2270000000	2410000000	1340000000	741000000	813000000	801000000	862000000	458000000	1.00:1.10:1.08:1.16:0.62	31287	class II fructose-1 6-bisphosphate aldolase [Caldalkalibacillus thermarum TA2.A1]
374	53	QZT35341.1	46.71	35	8	8	21200000	29100000	102000000	72100000	111000000	17200000	22700000	86000000	61800000	94500000	1.00:1.32:4.99:3.59:5.49	34134	6-phosphofructokinase [Caldalkalibacillus thermarum TA2.A1]
1061	426	QZT32711.1	46.39	24	4	4	10400000	12900000	9250000	6620000	3760000	9590000	11600000	8690000	5610000	3030000	1.00:1.21:0.91:0.58:0.32	27211	demethylmenaquinone methyltransferase [Caldalkalibacillus thermarum TA2.A1]
567	1684	QZT33746.1	46.3	27	4	4	8750000	9650000	56900000	69500000	194000000	8150000	8450000	50100000	61300000	172000000	1.00:1.04:6.15:7.52:21.17	35472	metal ABC transporter substrate-binding protein [Caldalkalibacillus thermarum TA2.A1]
592	3297	QZT34973.1	46.13	7	2	2	1290000	963000	9690000	10700000	17700000	1290000	963000	9690000	10700000	17700000	1.00:0.75:7.52:8.33:13.73	39876	3-isopropylmalate dehydrogenase [Caldalkalibacillus thermarum TA2.A1]
487	804	QZT35057.1	46.08	21	8	8	17800000	26700000	55700000	58600000	70700000	10100000	16900000	34300000	36700000	47600000	1.00:1.68:3.41:3.65:4.74	40441	bifunctional 3-deoxy-7-phosphoheptulonate synthase/chorismate mutase [Caldalkalibacillus thermarum TA2.A1]
379	624	QZT34097.1	46.05	29	7	7	30900000	37600000	36700000	24500000	50700000	16600000	20000000	19500000	12700000	27700000	1.00:1.20:1.18:0.77:1.67	53533	CoA-acylating methylmalonate-semialdehyde dehydrogenase [Caldalkalibacillus thermarum TA2.A1]
1234	3777	QZT34662.1	45.99	37	3	3	9990000	8250000	4010000	6470000	9350000	9990000	8250000	4010000	6470000	9350000	1.00:0.83:0.40:0.65:0.94	11621	helix-turn-helix domain-containing protein [Caldalkalibacillus thermarum TA2.A1]
130	63	QZT34741.1	45.89	47	13	13	118000000	135000000	203000000	344000000	448000000	60900000	67400000	94900000	155000000	187000000	1.00:1.11:1.56:2.55:3.08	33687	type I-B CRISPR-associated protein Cas7/Cst2/DevR [Caldalkalibacillus thermarum TA2.A1]
1075	250	QZT33144.1	45.87	52	7	7	24200000	44800000	22500000	18200000	14900000	18800000	33100000	16300000	12400000	10200000	1.00:1.76:0.87:0.66:0.54	19781	thiol-disulfide oxidoreductase ResA [Caldalkalibacillus thermarum TA2.A1]
155	69	QZT33635.1	45.67	55	16	16	367000000	342000000	433000000	257000000	110000000	136000000	132000000	178000000	98800000	39700000	1.00:0.97:1.31:0.73:0.29	43688	NAD(P)/FAD-dependent oxidoreductase [Caldalkalibacillus thermarum TA2.A1]
122	35	QZT33830.1	45.63	88	25	25	316000000	686000000	826000000	889000000	1320000000	99200000	227000000	267000000	315000000	458000000	1.00:2.29:2.69:3.18:4.62	49004	cobyrinate a c-diamide synthase [Caldalkalibacillus thermarum TA2.A1]
104	89	QZT33829.1	45.35	49	18	18	47100000	119000000	122000000	156000000	31000000	13100000	36300000	37900000	49100000	9970000	1.00:2.77:2.90:3.75:0.76	60348	cobyric acid synthase [Caldalkalibacillus thermarum TA2.A1]
1232	3474	QZT34802.1	45.29	20	3	3	2080000	1300000	2040000	2130000	6240000	2080000	1300000	2040000	2130000	6240000	1.00:0.63:0.98:1.03:3.00	21033	peptide-methionine (S)-S-oxide reductase MsrA [Caldalkalibacillus thermarum TA2.A1]
473	3034	QZT33747.1	45.28	46	8	8	106000000	93600000	81000000	81400000	46800000	68500000	64600000	53800000	52000000	29100000	1.00:0.94:0.79:0.76:0.43	29215	FAD-dependent thymidylate synthase [Caldalkalibacillus thermarum TA2.A1]
451	722	QZT33522.1	45.28	9	5	5	3940000	5010000	10300000	7080000	22600000	3550000	4560000	8860000	6320000	20100000	1.00:1.28:2.50:1.78:5.66	68430	pilus assembly PilX N-terminal domain-containing protein [Caldalkalibacillus thermarum TA2.A1]
485	81	QZT34862.1	45.12	18	4	4	17800000	27700000	32900000	27400000	2250000	14300000	21600000	25800000	22600000	1900000	1.00:1.52:1.81:1.58:0.13	37748	ABC transporter ATP-binding protein [Caldalkalibacillus thermarum TA2.A1]
1129	9672	QZT35128.1	45	34	3	3	21200000	19300000	34600000	33500000	35900000	21200000	19300000	34600000	33500000	35900000	1.00:0.91:1.63:1.58:1.70	19835	phosphatidylglycerophosphatase A [Caldalkalibacillus thermarum TA2.A1]
827	6710	QZT34159.1	44.96	21	4	4	92200000	65000000	53400000	62500000	13700000	71200000	54100000	42400000	44200000	10100000	1.00:0.76:0.60:0.62:0.14	16011	NADH-quinone oxidoreductase subunit NuoI [Caldalkalibacillus thermarum TA2.A1]
732	226	QZT33612.1	44.95	47	7	7	104000000	75700000	44900000	36000000	60200000	84900000	63300000	35600000	27400000	46400000	1.00:0.75:0.42:0.32:0.55	30479	substrate-binding domain-containing protein [Caldalkalibacillus thermarum TA2.A1]
228	270	QZT34740.1	44.76	27	13	13	22200000	22700000	37100000	65300000	85800000	15100000	14700000	21100000	39300000	42100000	1.00:0.97:1.40:2.60:2.78	70760	type I-B CRISPR-associated protein Cas8b1/Cst1 [Caldalkalibacillus thermarum TA2.A1]
361	526	QZT34027.1	44.69	51	10	10	74300000	80800000	78100000	99300000	55600000	42300000	37300000	42700000	52100000	27300000	1.00:0.88:1.01:1.23:0.65	28829	response regulator transcription factor [Caldalkalibacillus thermarum TA2.A1]
115	437	QZT34939.1	44.63	68	19	19	275000000	271000000	195000000	259000000	226000000	94700000	90300000	65900000	88900000	100000000	1.00:0.95:0.70:0.94:1.06	44127	NAD-dependent malic enzyme [Caldalkalibacillus thermarum TA2.A1]
636	268	QZT34982.1	44.54	9	3	3	20700000	13300000	3880000	2510000	2510000	20700000	13300000	3880000	2510000	2510000	1.00:0.64:0.19:0.12:0.12	46813	extracellular solute-binding protein [Caldalkalibacillus thermarum TA2.A1]
1	1205	QZT34681.1	44.5	18	17	17	13000000	16300000	77700000	84200000	503000000	4090000	5540000	23100000	24300000	138000000	1.00:1.35:5.65:5.93:33.80	170854	glutamate synthase large subunit [Caldalkalibacillus thermarum TA2.A1]
62	1414	QZT34701.1	44.44	20	8	8	49500000	71300000	59000000	36000000	5010000	30500000	45300000	37400000	22000000	2710000	1.00:1.48:1.22:0.72:0.09	66127	alpha-glucosidase [Caldalkalibacillus thermarum TA2.A1]
146	39	QZT33760.1	44.44	86	19	19	876000000	428000000	1550000000	1010000000	1960000000	305000000	158000000	724000000	520000000	874000000	1.00:0.52:2.37:1.70:2.86	29016	Fe-S cluster assembly ATPase SufC [Caldalkalibacillus thermarum TA2.A1]
924	1774	QZT35172.1	44.44	63	5	4	71800000	52700000	20200000	25600000	6490000	62400000	44900000	17800000	22300000	5280000	1.00:0.72:0.29:0.36:0.08	10028	metal-sensitive transcriptional regulator [Caldalkalibacillus thermarum TA2.A1]
726	530	QZT34417.1	44.17	49	6	6	264000000	214000000	127000000	116000000	69700000	148000000	123000000	73200000	69000000	40700000	1.00:0.83:0.49:0.47:0.27	18051	30S ribosomal protein S7 [Caldalkalibacillus thermarum TA2.A1]
353	639	QZT34382.1	43.88	14	3	3	12500000	6450000	3320000	3000000	1120000	12500000	6450000	3320000	3000000	1120000	1.00:0.51:0.26:0.24:0.09	43308	cysteine desulfurase [Caldalkalibacillus thermarum TA2.A1]
181	159	QZT33847.1	43.85	56	15	15	149000000	194000000	142000000	132000000	112000000	82400000	105000000	75400000	73600000	58400000	1.00:1.28:0.92:0.89:0.71	39822	uroporphyrinogen decarboxylase [Caldalkalibacillus thermarum TA2.A1]
1682	744	QZT34164.1	43.65	22	2	2	10500000	9230000	6310000	3660000	2570000	10500000	9230000	6310000	3660000	2570000	1.00:0.88:0.60:0.35:0.24	14452	NADH-quinone oxidoreductase subunit A [Caldalkalibacillus thermarum TA2.A1]
80	279	QZT35102.1	43.53	79	21	21	362000000	358000000	298000000	152000000	129000000	86000000	86800000	76600000	46500000	39200000	1.00:1.01:0.89:0.54:0.46	44092	acetate kinase [Caldalkalibacillus thermarum TA2.A1]
1199	2131	QZT35473.1	43.47	23	4	4	26300000	20800000	13700000	18000000	52800000	24600000	19800000	12400000	15900000	46900000	1.00:0.81:0.50:0.65:1.91	17348	dCMP deaminase family protein [Caldalkalibacillus thermarum TA2.A1]
119	467	QZT34379.1	43.43	55	23	23	213000000	251000000	300000000	243000000	275000000	73800000	92600000	124000000	104000000	118000000	1.00:1.25:1.67:1.41:1.60	57093	lysine--tRNA ligase [Caldalkalibacillus thermarum TA2.A1]
957	41237	QZT32657.1	43.35	45	2	2	6980000	6540000	2150000	2240000	2170000	6980000	6540000	2150000	2240000	2170000	1.00:0.94:0.31:0.32:0.31	10832	exodeoxyribonuclease VII small subunit [Caldalkalibacillus thermarum TA2.A1]
609	431	QZT35459.1	43.32	46	10	10	381000000	333000000	204000000	223000000	192000000	170000000	143000000	94000000	101000000	84400000	1.00:0.84:0.55:0.60:0.50	27726	thiazole synthase [Caldalkalibacillus thermarum TA2.A1]
829	460	QZT34266.1	43.1	60	5	5	403000000	216000000	110000000	202000000	113000000	370000000	200000000	102000000	180000000	99200000	1.00:0.54:0.28:0.49:0.27	11223	30S ribosomal protein S6 [Caldalkalibacillus thermarum TA2.A1]
1263	537	QZT32730.1	42.69	16	4	4	33600000	35400000	40500000	39200000	12700000	32400000	33800000	40100000	37200000	11500000	1.00:1.04:1.24:1.15:0.35	25133	cytochrome b6 [Caldalkalibacillus thermarum TA2.A1]
901	3814	QZT32605.1	42.59	29	3	3	27300000	28900000	51100000	63900000	26500000	27300000	28900000	51100000	63900000	26500000	1.00:1.06:1.87:2.34:0.97	21904	nitroreductase [Caldalkalibacillus thermarum TA2.A1]
389	365	QZT35456.1	42.57	9	2	2	1750000	1800000	2320000	792000	8500000	1750000	1800000	2320000	792000	8500000	1.00:1.03:1.33:0.45:4.86	39464	ABC transporter ATP-binding protein [Caldalkalibacillus thermarum TA2.A1]
247	102	QZT35121.1	42.52	64	17	17	415000000	473000000	405000000	352000000	347000000	178000000	207000000	168000000	151000000	148000000	1.00:1.16:0.94:0.85:0.83	27985	enoyl-ACP reductase FabI [Caldalkalibacillus thermarum TA2.A1]
823	22129	QZT33797.1	42.48	12	4	4	4600000	4020000	7590000	8740000	5450000	4210000	3650000	6760000	7760000	5060000	1.00:0.87:1.61:1.84:1.20	32640	histidinol-phosphatase HisJ family protein [Caldalkalibacillus thermarum TA2.A1]
815	1749	QZT32863.1	42.19	54	7	7	284000000	173000000	130000000	249000000	320000000	265000000	164000000	122000000	233000000	293000000	1.00:0.62:0.46:0.88:1.11	17930	low molecular weight phosphotyrosine protein phosphatase [Caldalkalibacillus thermarum TA2.A1]
77	406	QZT34494.1	42.07	47	17	17	46900000	54200000	102000000	84100000	114000000	17000000	19600000	38600000	28700000	43300000	1.00:1.16:2.27:1.69:2.55	66401	glutamine--fructose-6-phosphate transaminase (isomerizing) [Caldalkalibacillus thermarum TA2.A1]
606	642	QZT32970.1	41.96	16	5	5	18100000	18300000	19600000	20100000	37200000	13900000	15600000	16200000	17000000	31000000	1.00:1.12:1.16:1.22:2.22	45714	aspartate kinase [Caldalkalibacillus thermarum TA2.A1]
309	355	QZT33111.1	41.82	33	9	9	16200000	29100000	40300000	35900000	55600000	9400000	18800000	26500000	24600000	35000000	1.00:2.00:2.82:2.62:3.72	32815	UDP-N-acetylmuramate dehydrogenase [Caldalkalibacillus thermarum TA2.A1]
881	12748	QZT33953.1	41.78	6	2	2	2490000	1970000	2670000	532000	8810000	2490000	1970000	2670000	532000	8810000	1.00:0.79:1.07:0.21:3.53	31680	hypothetical protein HUR95_00485 [Caldalkalibacillus thermarum TA2.A1]
124	87	QZT34257.1	41.77	67	14	14	23800000	49400000	147000000	206000000	92000000	10600000	21700000	58400000	84500000	39100000	1.00:2.04:5.51:7.97:3.69	40204	inositol-3-phosphate synthase [Caldalkalibacillus thermarum TA2.A1]
169	67	QZT35312.1	41.71	63	22	22	218000000	310000000	747000000	913000000	791000000	101000000	145000000	322000000	413000000	350000000	1.00:1.44:3.20:4.10:3.47	37252	type I-B CRISPR-associated protein Cas7/Csh2 [Caldalkalibacillus thermarum TA2.A1]
87	108	QZT33521.1	41.5	45	19	19	166000000	211000000	198000000	144000000	439000000	62400000	80500000	69200000	50800000	140000000	1.00:1.29:1.11:0.81:2.24	62322	Flp pilus assembly complex ATPase component TadA [Caldalkalibacillus thermarum TA2.A1]
898	1607	QZT33876.1	41.47	32	6	6	16000000	24000000	40500000	15900000	53200000	11200000	17200000	28600000	12100000	35700000	1.00:1.54:2.55:1.08:3.18	34475	formyltetrahydrofolate deformylase [Caldalkalibacillus thermarum TA2.A1]
413	466	QZT34974.1	41.46	8	2	2	620000	1130000	11400000	10400000	12700000	620000	1130000	11400000	10400000	12700000	1.00:1.82:18.32:16.85:20.52	52437	3-isopropylmalate dehydratase large subunit [Caldalkalibacillus thermarum TA2.A1]
1182	3537	QZT33416.1	41.36	9	2	2	753000	879000	1270000	915000	3990000	753000	879000	1270000	915000	3990000	1.00:1.17:1.68:1.22:5.31	27766	nicotinate-nucleotide adenylyltransferase [Caldalkalibacillus thermarum TA2.A1]
282	1303	QZT35394.1	41.35	57	18	18	182000000	214000000	228000000	242000000	282000000	68800000	81700000	83700000	96200000	100000000	1.00:1.19:1.22:1.40:1.45	39479	flavodoxin-dependent (E)-4-hydroxy-3-methylbut-2-enyl-diphosphate synthase [Caldalkalibacillus thermarum TA2.A1]
581	434	QZT33129.1	41.1	37	8	8	418000000	293000000	156000000	175000000	96500000	300000000	228000000	110000000	124000000	69600000	1.00:0.76:0.37:0.41:0.23	19699	N-acetyltransferase [Caldalkalibacillus thermarum TA2.A1]
926	3745	QZT32708.1	40.97	72	5	5	78900000	98100000	87700000	109000000	72400000	64600000	78300000	74100000	93200000	61200000	1.00:1.21:1.15:1.44:0.95	8423	trp RNA-binding attenuation protein MtrB [Caldalkalibacillus thermarum TA2.A1]
212	213	QZT35523.1	40.91	86	22	22	113000000	292000000	380000000	339000000	840000000	41000000	112000000	155000000	140000000	316000000	1.00:2.74:3.77:3.41:7.71	39486	cobalamin biosynthesis protein [Caldalkalibacillus thermarum TA2.A1]
512	1262	QZT33571.1	40.9	45	9	2	1600000	2060000	2560000	2370000	4550000	1600000	2060000	2560000	2370000	4550000	1.00:1.29:1.60:1.48:2.85	34611	electron transfer flavoprotein subunit alpha/FixB family protein [Caldalkalibacillus thermarum TA2.A1]
95	296	QZT32674.1	40.86	55	17	17	485000000	750000000	419000000	287000000	194000000	209000000	322000000	158000000	116000000	83500000	1.00:1.54:0.76:0.56:0.40	48032	2-oxo acid dehydrogenase subunit E2 [Caldalkalibacillus thermarum TA2.A1]
438	903	QZT33364.1	40.85	42	9	9	56100000	67700000	38700000	37200000	34700000	30200000	37300000	18900000	18900000	19100000	1.00:1.24:0.63:0.62:0.63	36008	TIM barrel protein [Caldalkalibacillus thermarum TA2.A1]
1200	702	QZT32889.1	40.52	26	4	4	23700000	11900000	25300000	35600000	49200000	20200000	10400000	20200000	29600000	40700000	1.00:0.52:1.00:1.47:2.02	18697	thiol peroxidase [Caldalkalibacillus thermarum TA2.A1]
322	139	QZT33369.1	40.49	59	14	14	77500000	115000000	127000000	114000000	161000000	33300000	48200000	55000000	49000000	70400000	1.00:1.45:1.65:1.47:2.11	34765	GTPase Era [Caldalkalibacillus thermarum TA2.A1]
344	1366	QZT33308.1	40.4	49	15	15	144000000	147000000	158000000	125000000	218000000	42800000	46600000	68200000	56000000	113000000	1.00:1.09:1.59:1.31:2.65	38163	ThiF family adenylyltransferase [Caldalkalibacillus thermarum TA2.A1]
833	552	QZT33011.1	40.3	80	7	7	123000000	108000000	49600000	75700000	179000000	93500000	81400000	36300000	54700000	129000000	1.00:0.87:0.39:0.59:1.38	13104	response regulator [Caldalkalibacillus thermarum TA2.A1]
875	2999	QZT33857.1	40.29	9	2	2	677000	2030000	6430000	4510000	10700000	677000	2030000	6430000	4510000	10700000	1.00:2.99:9.50:6.66:15.73	34972	prephenate dehydratase [Caldalkalibacillus thermarum TA2.A1]
1133	581	QZT33372.1	40.29	25	2	2	16600000	17900000	5290000	8230000	12200000	16600000	17900000	5290000	8230000	12200000	1.00:1.08:0.32:0.50:0.74	17828	rRNA maturation RNase YbeY [Caldalkalibacillus thermarum TA2.A1]
1381	55420	QZT35209.1	40.23	16	2	2	404000	694000	1800000	1610000	2080000	268000	486000	1320000	1200000	1640000	1.00:1.81:4.93:4.47:6.13	12036	4a-hydroxytetrahydrobiopterin dehydratase [Caldalkalibacillus thermarum TA2.A1]
1100	411	QZT33452.1	40.22	6	4	4	128000000	191000000	116000000	90300000	45300000	128000000	190000000	115000000	89200000	44900000	1.00:1.49:0.90:0.70:0.35	61487	b(o/a)3-type cytochrome-c oxidase subunit 1 [Caldalkalibacillus thermarum TA2.A1]
226	2461	QZT32671.1	40.16	42	15	15	529000000	715000000	254000000	215000000	183000000	230000000	328000000	116000000	91400000	82700000	1.00:1.43:0.50:0.40:0.36	40274	Glu/Leu/Phe/Val dehydrogenase [Caldalkalibacillus thermarum TA2.A1]
211	293	QZT33547.1	40.04	61	18	18	66500000	62400000	256000000	202000000	445000000	25800000	25500000	88600000	60900000	151000000	1.00:0.99:3.44:2.36:5.85	46442	homocysteine synthase [Caldalkalibacillus thermarum TA2.A1]
997	2687	QZT33546.1	39.94	14	2	2	4740000	4460000	1580000	1020000	1870000	4740000	4460000	1580000	1020000	1870000	1.00:0.94:0.33:0.21:0.39	18013	MarR family transcriptional regulator [Caldalkalibacillus thermarum TA2.A1]
761	6547	QZT32924.1	39.66	50	6	6	46500000	30800000	21500000	41900000	7260000	32100000	21600000	15200000	29200000	5830000	1.00:0.67:0.48:0.91:0.18	15726	MerR family transcriptional regulator [Caldalkalibacillus thermarum TA2.A1]
528	645	QZT33095.1	39.48	42	6	6	121000000	97200000	30500000	37500000	35400000	90900000	77600000	22500000	26400000	23100000	1.00:0.85:0.25:0.29:0.25	19467	DivIVA domain-containing protein [Caldalkalibacillus thermarum TA2.A1]
171	203	QZT34315.1	39.47	56	15	15	165000000	192000000	215000000	165000000	73500000	75400000	89200000	93300000	71400000	33400000	1.00:1.18:1.24:0.95:0.44	48935	serine--tRNA ligase [Caldalkalibacillus thermarum TA2.A1]
1246	12931	QZT33169.1	39.43	32	4	4	22200000	17800000	10400000	16900000	10100000	22000000	17000000	9590000	15700000	9280000	1.00:0.77:0.44:0.71:0.42	19264	transcriptional repressor [Caldalkalibacillus thermarum TA2.A1]
778	201	QZT32621.1	39.21	33	5	5	13600000	19700000	14300000	22800000	16800000	12400000	18500000	12600000	19900000	14900000	1.00:1.49:1.02:1.61:1.21	26492	flagellar brake domain-containing protein [Caldalkalibacillus thermarum TA2.A1]
505	412	QZT33689.1	39.19	25	7	7	9690000	14200000	28400000	27600000	40600000	7850000	11000000	19500000	18100000	27300000	1.00:1.40:2.49:2.31:3.47	44258	DNA cytosine methyltransferase [Caldalkalibacillus thermarum TA2.A1]
1204	1476	QZT33309.1	39.13	34	3	3	67200000	34900000	17000000	31600000	32500000	63900000	33200000	16600000	30600000	31400000	1.00:0.52:0.26:0.48:0.49	8677	molybdopterin converting factor subunit 1 [Caldalkalibacillus thermarum TA2.A1]
1044	9864	QZT35398.1	39.11	26	3	3	4240000	3870000	3400000	4240000	7910000	4240000	3870000	3400000	4240000	7910000	1.00:0.91:0.80:1.00:1.86	26399	Stp1/IreP family PP2C-type Ser/Thr phosphatase [Caldalkalibacillus thermarum TA2.A1]
200	161	QZT34493.1	39.09	43	14	14	194000000	203000000	361000000	258000000	293000000	111000000	116000000	212000000	151000000	180000000	1.00:1.04:1.91:1.36:1.62	48275	phosphoglucosamine mutase [Caldalkalibacillus thermarum TA2.A1]
874	922	QZT33801.1	39.02	7	3	3	2730000	3340000	6380000	5580000	6620000	2730000	3340000	6380000	5580000	6620000	1.00:1.22:2.34:2.04:2.43	41436	threonine-phosphate decarboxylase CobD [Caldalkalibacillus thermarum TA2.A1]
292	142	QZT33937.1	38.92	79	13	13	1070000000	995000000	911000000	1540000000	335000000	563000000	515000000	483000000	793000000	189000000	1.00:0.92:0.86:1.41:0.33	21662	ribosome-associated translation inhibitor RaiA [Caldalkalibacillus thermarum TA2.A1]
888	356	QZT33430.1	38.86	21	5	5	10900000	6940000	3230000	5330000	5730000	7840000	5030000	2240000	4480000	4760000	1.00:0.64:0.29:0.57:0.61	45760	efflux RND transporter periplasmic adaptor subunit [Caldalkalibacillus thermarum TA2.A1]
600	362	QZT33152.1	38.85	62	9	9	75100000	101000000	167000000	207000000	163000000	42200000	55700000	89300000	125000000	101000000	1.00:1.32:2.12:2.96:2.40	23790	riboflavin synthase [Caldalkalibacillus thermarum TA2.A1]
296	457	QZT33029.1	38.84	26	9	9	23900000	29400000	30100000	28400000	45300000	11400000	15400000	16400000	15200000	24800000	1.00:1.35:1.44:1.33:2.18	48423	FADH(2)-oxidizing methylenetetrahydrofolate--tRNA-(uracil(54)-C(5))-methyltransferase TrmFO [Caldalkalibacillus thermarum TA2.A1]
1040	493	QZT33245.1	38.8	29	5	5	1540000000	2070000000	951000000	886000000	83700000	1490000000	2040000000	931000000	843000000	80600000	1.00:1.36:0.62:0.56:0.05	18797	DoxX family protein [Caldalkalibacillus thermarum TA2.A1]
157	1961	QZT35114.1	38.62	38	15	15	46300000	63600000	65500000	33900000	40300000	19900000	27800000	27600000	14500000	16700000	1.00:1.40:1.38:0.73:0.84	70440	oligoendopeptidase F [Caldalkalibacillus thermarum TA2.A1]
22	373	QZT33759.1	38.4	72	26	26	930000000	449000000	1480000000	1120000000	2070000000	234000000	108000000	368000000	264000000	495000000	1.00:0.46:1.57:1.13:2.12	47986	Fe-S cluster assembly protein SufD [Caldalkalibacillus thermarum TA2.A1]
68	358	QZT33902.1	38.37	40	25	25	43600000	49000000	77300000	46700000	82400000	13700000	15900000	23800000	15800000	28900000	1.00:1.16:1.75:1.15:2.11	106276	excinuclease ABC subunit UvrA [Caldalkalibacillus thermarum TA2.A1]
208	255	QZT33761.1	38.33	56	16	16	41000000	46800000	79200000	69900000	66400000	16300000	21600000	33300000	31200000	28500000	1.00:1.33:2.04:1.92:1.75	47087	U32 family peptidase [Caldalkalibacillus thermarum TA2.A1]
1120	566	QZT35271.1	38.23	18	3	3	10100000	8710000	3540000	3810000	1160000	10100000	8710000	3540000	3810000	1160000	1.00:0.86:0.35:0.38:0.11	25431	MgtC/SapB family protein [Caldalkalibacillus thermarum TA2.A1]
769	34211	QZT32588.1	38.23	73	8	8	201000000	191000000	147000000	170000000	123000000	140000000	132000000	104000000	121000000	88100000	1.00:0.94:0.74:0.86:0.63	16907	preQ(1) synthase [Caldalkalibacillus thermarum TA2.A1]
1144	22083	QZT33921.1	38.11	11	2	2	1120000	1970000	2420000	1720000	6780000	1120000	1970000	2420000	1720000	6780000	1.00:1.76:2.17:1.54:6.07	23523	adenylyl-sulfate kinase [Caldalkalibacillus thermarum TA2.A1]
53	20	QZT34859.1	38.07	46	15	15	2070000000	1520000000	882000000	851000000	34300000	825000000	616000000	322000000	325000000	12900000	1.00:0.75:0.39:0.39:0.02	59243	glutathione ABC transporter substrate-binding protein [Caldalkalibacillus thermarum TA2.A1]
663	178	QZT35185.1	38.04	15	2	2	2100000	1620000	3410000	7670000	1830000	2100000	1620000	3410000	7670000	1830000	1.00:0.77:1.62:3.65:0.87	28390	CRISPR-associated endoribonuclease Cas6 [Caldalkalibacillus thermarum TA2.A1]
560	2016	QZT35263.1	38.03	6	2	2	496000	330000	1700000	954000	1650000	496000	330000	1700000	954000	1650000	1.00:0.67:3.44:1.92:3.33	60914	peptide-binding protein [Caldalkalibacillus thermarum TA2.A1]
138	104	QZT34456.1	38	55	13	13	290000000	272000000	370000000	272000000	195000000	185000000	181000000	235000000	162000000	120000000	1.00:0.98:1.27:0.88:0.65	39937	P-loop NTPase [Caldalkalibacillus thermarum TA2.A1]
324	2649	QZT33884.1	37.99	76	15	15	161000000	231000000	478000000	289000000	249000000	79600000	107000000	224000000	132000000	121000000	1.00:1.34:2.81:1.65:1.53	27120	triose-phosphate isomerase [Caldalkalibacillus thermarum TA2.A1]
434	3786	QZT35527.1	37.98	57	10	10	249000000	124000000	117000000	235000000	160000000	144000000	76000000	63400000	108000000	83700000	1.00:0.53:0.44:0.75:0.58	21486	thioredoxin family protein [Caldalkalibacillus thermarum TA2.A1]
478	548	QZT33827.1	37.83	59	12	12	83200000	215000000	306000000	270000000	693000000	58000000	133000000	180000000	149000000	406000000	1.00:2.30:3.10:2.57:7.01	27473	hypothetical protein HUR95_16735 [Caldalkalibacillus thermarum TA2.A1]
510	389	QZT32895.1	37.64	16	5	5	6580000	6320000	5240000	4860000	9290000	6140000	6010000	4760000	4670000	8590000	1.00:0.98:0.77:0.76:1.40	66000	thiol reductant ABC exporter subunit CydC [Caldalkalibacillus thermarum TA2.A1]
1086	1900	QZT33938.1	37.61	14	2	2	4250000	2680000	8030000	5870000	59400000	4250000	2680000	8030000	5870000	59400000	1.00:0.63:1.89:1.38:13.98	20998	chemotaxis protein CheW [Caldalkalibacillus thermarum TA2.A1]
224	610	QZT32580.1	37.55	31	12	12	226000000	229000000	99700000	91900000	72600000	130000000	141000000	59600000	54500000	40900000	1.00:1.08:0.46:0.42:0.31	39798	D-alanine--D-alanine ligase [Caldalkalibacillus thermarum TA2.A1]
385	6553	QZT32537.1	37.54	81	7	7	356000000	260000000	129000000	171000000	138000000	271000000	192000000	87700000	107000000	92300000	1.00:0.71:0.32:0.40:0.34	16604	YtoQ family protein [Caldalkalibacillus thermarum TA2.A1]
455	443	QZT34409.1	37.52	49	12	12	216000000	160000000	185000000	199000000	135000000	115000000	80300000	107000000	116000000	71600000	1.00:0.70:0.94:1.01:0.62	24821	50S ribosomal protein L1 [Caldalkalibacillus thermarum TA2.A1]
121	414	QZT33854.1	37.49	70	22	22	195000000	160000000	128000000	150000000	286000000	58100000	52000000	49500000	54200000	105000000	1.00:0.90:0.85:0.93:1.81	45092	KamA family radical SAM protein [Caldalkalibacillus thermarum TA2.A1]
75	267	QZT33316.1	37.32	57	25	25	474000000	439000000	334000000	178000000	197000000	128000000	120000000	88300000	48800000	50100000	1.00:0.94:0.69:0.38:0.39	70973	molybdopterin biosynthesis protein [Caldalkalibacillus thermarum TA2.A1]
23	181	QZT32954.1	37.32	70	26	26	851000000	796000000	625000000	639000000	584000000	318000000	302000000	212000000	244000000	207000000	1.00:0.95:0.67:0.77:0.65	63108	2-oxoacid:acceptor oxidoreductase subunit alpha [Caldalkalibacillus thermarum TA2.A1]
230	1185	QZT34193.1	37.27	43	12	12	44600000	59400000	90800000	93900000	67700000	23000000	29900000	45600000	47300000	32600000	1.00:1.30:1.98:2.06:1.42	45951	UDP-N-acetylglucosamine 1-carboxyvinyltransferase [Caldalkalibacillus thermarum TA2.A1]
55	287	QZT33436.1	37.23	43	15	10	31000000	67200000	169000000	170000000	72600000	18400000	35600000	81700000	74800000	31600000	1.00:1.93:4.44:4.07:1.72	50278	type I glutamate--ammonia ligase [Caldalkalibacillus thermarum TA2.A1]
1358	175	QZT34427.1	37.22	26	3	3	138000000	99300000	56900000	48000000	56400000	138000000	99300000	56900000	48000000	56400000	1.00:0.72:0.41:0.35:0.41	16187	50S ribosomal protein L16 [Caldalkalibacillus thermarum TA2.A1]
501	1279	QZT33175.1	37.07	75	11	11	317000000	238000000	332000000	632000000	341000000	157000000	126000000	187000000	354000000	184000000	1.00:0.80:1.19:2.25:1.17	23075	MBL fold metallo-hydrolase [Caldalkalibacillus thermarum TA2.A1]
234	1527	QZT32866.1	36.98	34	12	12	34000000	38800000	31000000	25700000	20800000	17600000	18000000	13000000	14400000	10700000	1.00:1.02:0.74:0.82:0.61	63931	phosphoenolpyruvate--protein phosphotransferase [Caldalkalibacillus thermarum TA2.A1]
994	794	QZT32535.1	36.97	41	7	7	38600000	38100000	35100000	43700000	52600000	29200000	29600000	26800000	34900000	39400000	1.00:1.01:0.92:1.20:1.35	24781	7-cyano-7-deazaguanine synthase QueC [Caldalkalibacillus thermarum TA2.A1]
408	219	QZT32724.1	36.91	28	9	9	15100000	19400000	33900000	37800000	57100000	10000000	11500000	20900000	22700000	32200000	1.00:1.15:2.08:2.26:3.21	48302	3-phosphoshikimate 1-carboxyvinyltransferase [Caldalkalibacillus thermarum TA2.A1]
841	6566	QZT34534.1	36.82	27	5	5	7180000	8020000	13400000	14200000	11600000	6020000	6700000	11000000	11900000	10500000	1.00:1.11:1.83:1.97:1.74	35286	homoserine O-succinyltransferase [Caldalkalibacillus thermarum TA2.A1]
493	310	QZT34051.1	36.77	20	4	4	8250000	9520000	11400000	11500000	15900000	7220000	8190000	10400000	10500000	13400000	1.00:1.13:1.44:1.46:1.85	40174	iron-containing alcohol dehydrogenase family protein [Caldalkalibacillus thermarum TA2.A1]
152	32	QZT34168.1	36.76	42	25	25	1140000000	1310000000	1680000000	1210000000	1900000000	400000000	445000000	584000000	433000000	657000000	1.00:1.11:1.46:1.08:1.64	54956	F0F1 ATP synthase subunit alpha [Caldalkalibacillus thermarum TA2.A1]
189	254	QZT32821.1	36.76	26	8	8	67300000	60600000	28700000	25400000	18300000	39900000	36600000	16300000	17100000	12600000	1.00:0.92:0.41:0.43:0.32	50188	signal recognition particle protein [Caldalkalibacillus thermarum TA2.A1]
838	6811	QZT32923.1	36.6	44	7	7	61400000	55100000	36400000	39300000	38200000	45700000	42200000	28900000	29800000	28600000	1.00:0.92:0.63:0.65:0.63	23143	transcriptional repressor LexA [Caldalkalibacillus thermarum TA2.A1]
401	79	QZT32585.1	36.53	22	7	7	18000000	15100000	7200000	9750000	5160000	10600000	10200000	4290000	5230000	3120000	1.00:0.96:0.40:0.49:0.29	46070	ABC transporter substrate-binding protein [Caldalkalibacillus thermarum TA2.A1]
591	2365	QZT33877.1	36.52	8	2	2	1300000	2510000	6470000	2080000	7780000	1300000	2510000	6470000	2080000	7780000	1.00:1.93:4.96:1.60:5.97	39517	DUF2332 domain-containing protein [Caldalkalibacillus thermarum TA2.A1]
1421	2282	QZT33160.1	36.48	22	2	2	12300000	11300000	5300000	6540000	7140000	12300000	11300000	5300000	6540000	7140000	1.00:0.92:0.43:0.53:0.58	16825	anti-sigma F factor [Caldalkalibacillus thermarum TA2.A1]
734	326	QZT34452.1	36.48	15	3	3	1790000	1930000	1990000	1580000	4540000	1790000	1930000	1990000	1580000	4540000	1.00:1.08:1.11:0.88:2.53	31977	tRNA pseudouridine(38-40) synthase TruA [Caldalkalibacillus thermarum TA2.A1]
1158	28231	QZT34300.1	36.46	45	2	2	75500000	40400000	26900000	38800000	60100000	75500000	40400000	26900000	38800000	60100000	1.00:0.53:0.36:0.51:0.80	7946	S4 domain-containing protein YaaA [Caldalkalibacillus thermarum TA2.A1]
578	516	QZT34646.1	36.46	46	9	9	53700000	59400000	80700000	95900000	45400000	37300000	41100000	50600000	61700000	30700000	1.00:1.10:1.36:1.66:0.82	31807	cobalamin-binding protein [Caldalkalibacillus thermarum TA2.A1]
864	205	QZT34454.1	36.44	63	10	10	496000000	350000000	245000000	194000000	336000000	281000000	233000000	141000000	109000000	189000000	1.00:0.83:0.50:0.39:0.67	14683	30S ribosomal protein S9 [Caldalkalibacillus thermarum TA2.A1]
1298	750	QZT33014.1	36.44	54	3	3	7250000	7330000	7000000	6430000	15200000	6650000	6710000	6310000	6100000	13600000	1.00:1.01:0.95:0.92:2.05	8919	flagellar FlbD family protein [Caldalkalibacillus thermarum TA2.A1]
1295	9814	QZT32983.1	36.41	19	2	2	6610000	4470000	3890000	5160000	9380000	6610000	4470000	3890000	5160000	9380000	1.00:0.68:0.59:0.78:1.42	11288	YlxQ family RNA-binding protein [Caldalkalibacillus thermarum TA2.A1]
1043	3605	QZT34175.1	36.4	59	4	4	99600000	68300000	32500000	58300000	28600000	94400000	64600000	31000000	54600000	27100000	1.00:0.68:0.33:0.58:0.29	13779	thioredoxin family protein [Caldalkalibacillus thermarum TA2.A1]
264	327	QZT34868.1	36.25	75	17	17	456000000	431000000	479000000	615000000	811000000	220000000	210000000	235000000	304000000	395000000	1.00:0.95:1.07:1.39:1.80	22039	guanylate kinase [Caldalkalibacillus thermarum TA2.A1]
1685	3210	QZT34866.1	36.24	53	2	2	1260000	439000	4680000	7160000	10300000	1260000	439000	4680000	7160000	10300000	1.00:0.35:3.70:5.67:8.12	6334	hypothetical protein HUR95_06340 [Caldalkalibacillus thermarum TA2.A1]
725	506	QZT34063.1	36.22	51	6	6	64900000	77300000	112000000	148000000	39500000	47800000	54600000	79400000	97100000	30600000	1.00:1.14:1.66:2.03:0.64	16081	DUF86 domain-containing protein [Caldalkalibacillus thermarum TA2.A1]
178	594	QZT35232.1	36.22	41	15	15	2490000000	1870000000	1090000000	1340000000	906000000	1530000000	1280000000	702000000	734000000	544000000	1.00:0.84:0.46:0.48:0.35	50015	ABC transporter substrate-binding protein [Caldalkalibacillus thermarum TA2.A1]
290	559	QZT35421.1	36.19	61	10	10	171000000	186000000	190000000	186000000	380000000	88800000	97400000	100000000	103000000	201000000	1.00:1.10:1.13:1.17:2.26	30064	4-hydroxy-tetrahydrodipicolinate synthase [Caldalkalibacillus thermarum TA2.A1]
194	285	QZT34613.1	36.16	42	10	10	120000000	151000000	104000000	77200000	27000000	83300000	98000000	68400000	49600000	17100000	1.00:1.18:0.82:0.59:0.20	28776	phosphoribosylaminoimidazolesuccinocarboxamide synthase [Caldalkalibacillus thermarum TA2.A1]
588	1809	QZT34712.1	36.11	27	6	6	18200000	31000000	35900000	53800000	54700000	17100000	28700000	33500000	46700000	47200000	1.00:1.67:1.95:2.72:2.75	25001	hypothetical protein HUR95_05240 [Caldalkalibacillus thermarum TA2.A1]
356	2796	QZT33890.1	36.08	10	3	3	6740000	10500000	22100000	5640000	25700000	6740000	10500000	22100000	5640000	25700000	1.00:1.56:3.29:0.84:3.81	66663	phospho-sugar mutase [Caldalkalibacillus thermarum TA2.A1]
54	335	QZT32988.1	35.92	46	21	21	247000000	318000000	293000000	220000000	289000000	75500000	94600000	80500000	58000000	76800000	1.00:1.25:1.07:0.77:1.02	64046	proline--tRNA ligase [Caldalkalibacillus thermarum TA2.A1]
368	83	QZT35436.1	35.9	25	9	9	24700000	20300000	20300000	15300000	50800000	15100000	12300000	11700000	9730000	28700000	1.00:0.82:0.78:0.65:1.91	66705	HAMP domain-containing protein [Caldalkalibacillus thermarum TA2.A1]
367	261	QZT34519.1	35.86	30	7	7	5270000	7940000	12300000	14900000	9150000	3020000	4180000	6510000	9670000	5510000	1.00:1.39:2.16:3.21:1.83	40725	23S rRNA (adenine(2503)-C(2))-methyltransferase RlmN [Caldalkalibacillus thermarum TA2.A1]
566	34200	QZT35126.1	35.85	43	5	5	49900000	25000000	13300000	26700000	15300000	43500000	22400000	11100000	22700000	13600000	1.00:0.52:0.25:0.52:0.31	16301	GNAT family N-acetyltransferase [Caldalkalibacillus thermarum TA2.A1]
96	957	QZT33122.1	35.77	51	20	20	265000000	239000000	267000000	240000000	476000000	113000000	95600000	92700000	81300000	155000000	1.00:0.84:0.82:0.72:1.37	46727	adenosylhomocysteinase [Caldalkalibacillus thermarum TA2.A1]
41	3	QZT33336.1	35.76	57	27	26	188000000	195000000	181000000	176000000	281000000	56200000	60100000	57400000	55700000	96500000	1.00:1.07:1.02:0.99:1.72	64874	ribonuclease J [Caldalkalibacillus thermarum TA2.A1]
406	136	QZT35387.1	35.74	13	5	5	6510000	4800000	4720000	7240000	8460000	5350000	4010000	3240000	6310000	7330000	1.00:0.75:0.61:1.18:1.37	56283	methylmalonyl-CoA carboxyltransferase [Caldalkalibacillus thermarum TA2.A1]
81	507	QZT35206.1	35.68	2	2	2	834000	1040000	1370000	269000	5530000	834000	1040000	1370000	269000	5530000	1.00:1.25:1.64:0.32:6.63	168105	AAA family ATPase [Caldalkalibacillus thermarum TA2.A1]
407	3635	QZT32777.1	35.66	37	10	10	31200000	146000000	157000000	138000000	125000000	18400000	85900000	95100000	73100000	69300000	1.00:4.66:5.16:3.97:3.76	46773	dihydroorotase [Caldalkalibacillus thermarum TA2.A1]
611	1208	QZT34754.1	35.55	40	8	8	14900000	23100000	68400000	73600000	71200000	8540000	12900000	39000000	41100000	38500000	1.00:1.51:4.57:4.82:4.51	29830	type I-B CRISPR-associated protein Cas5b [Caldalkalibacillus thermarum TA2.A1]
396	376	QZT33840.1	35.5	47	9	9	147000000	139000000	72400000	90600000	42900000	86400000	79900000	42400000	49400000	23600000	1.00:0.93:0.49:0.57:0.27	41732	acetyl-CoA C-acetyltransferase [Caldalkalibacillus thermarum TA2.A1]
565	2921	QZT33283.1	35.45	27	8	8	17200000	25300000	33900000	26700000	50600000	11900000	17600000	23100000	17100000	33700000	1.00:1.48:1.94:1.44:2.84	44966	radical SAM/CxCxxxxC motif protein YfkAB [Caldalkalibacillus thermarum TA2.A1]
520	2249	QZT32606.1	35.34	33	8	8	18100000	20300000	16000000	14800000	23100000	7080000	8010000	8520000	7850000	12200000	1.00:1.13:1.20:1.11:1.73	39472	LLM class flavin-dependent oxidoreductase [Caldalkalibacillus thermarum TA2.A1]
1148	2968	QZT34129.1	35.33	5	2	2	1540000	1790000	1210000	1100000	934000	1540000	1790000	1210000	1100000	934000	1.00:1.16:0.79:0.71:0.60	51035	alanine:cation symporter family protein [Caldalkalibacillus thermarum TA2.A1]
354	1824	QZT34817.1	35.2	77	10	10	545000000	391000000	1060000000	1370000000	1810000000	350000000	241000000	605000000	766000000	1040000000	1.00:0.69:1.73:2.19:2.97	18487	thiol peroxidase [Caldalkalibacillus thermarum TA2.A1]
812	2136	QZT33816.1	35.15	15	3	3	16500000	12800000	4020000	4190000	3740000	16500000	12800000	4020000	4190000	3740000	1.00:0.78:0.24:0.25:0.23	38026	LacI family transcriptional regulator [Caldalkalibacillus thermarum TA2.A1]
716	628	QZT35105.1	35.1	64	9	9	197000000	212000000	225000000	231000000	135000000	130000000	141000000	150000000	149000000	89000000	1.00:1.09:1.15:1.15:0.69	18419	molybdenum cofactor biosynthesis protein MoaB [Caldalkalibacillus thermarum TA2.A1]
1149	662	QZT34428.1	35.09	37	2	2	375000000	230000000	142000000	206000000	11700000	375000000	230000000	142000000	206000000	11700000	1.00:0.61:0.38:0.55:0.03	7762	50S ribosomal protein L29 [Caldalkalibacillus thermarum TA2.A1]
148	6958	QZT34632.1	34.98	53	12	8	33700000	64700000	112000000	60600000	417000000	25100000	49600000	86400000	49100000	327000000	1.00:1.98:3.44:1.95:13.00	38476	flagellin [Caldalkalibacillus thermarum TA2.A1]
513	611	QZT32856.1	34.96	19	4	4	7390000	6260000	7290000	5800000	16700000	7140000	6090000	7010000	5560000	15900000	1.00:0.85:0.98:0.78:2.22	54665	o-succinylbenzoate--CoA ligase [Caldalkalibacillus thermarum TA2.A1]
85	158	QZT33758.1	34.86	80	21	21	407000000	194000000	774000000	513000000	1070000000	107000000	46000000	190000000	128000000	276000000	1.00:0.43:1.76:1.19:2.57	45213	cysteine desulfurase [Caldalkalibacillus thermarum TA2.A1]
39	71	QZT33756.1	34.83	54	24	24	386000000	186000000	774000000	594000000	1270000000	120000000	62300000	227000000	197000000	400000000	1.00:0.52:1.89:1.65:3.34	52498	Fe-S cluster assembly protein SufB [Caldalkalibacillus thermarum TA2.A1]
462	6822	QZT33362.1	34.82	22	5	5	22800000	21100000	11200000	7100000	9270000	17800000	16300000	8830000	5890000	6830000	1.00:0.91:0.50:0.33:0.38	42993	RNA polymerase sigma factor RpoD [Caldalkalibacillus thermarum TA2.A1]
918	1042	QZT35386.1	34.76	28	4	4	9090000	11400000	32000000	36900000	49600000	8190000	10400000	30600000	35800000	48000000	1.00:1.27:3.73:4.37:5.85	25319	lipoyl(octanoyl) transferase LipB [Caldalkalibacillus thermarum TA2.A1]
738	1071	QZT32548.1	34.74	21	2	2	14000000	4920000	59000000	98500000	44700000	14000000	4920000	59000000	98500000	44700000	1.00:0.35:4.23:7.05:3.20	13973	metalloregulator ArsR/SmtB family transcription factor [Caldalkalibacillus thermarum TA2.A1]
78	1166	QZT34518.1	34.69	14	12	12	39000000	22900000	10900000	14000000	18800000	16800000	9610000	4780000	6610000	8880000	1.00:0.57:0.29:0.39:0.53	128502	DEAD/DEAH box helicase [Caldalkalibacillus thermarum TA2.A1]
299	3234	QZT33467.1	34.6	10	4	4	2240000	2350000	2070000	1950000	2980000	2050000	2170000	1890000	1860000	2910000	1.00:1.06:0.92:0.91:1.42	87584	ATP-dependent RecD-like DNA helicase [Caldalkalibacillus thermarum TA2.A1]
45	8	QZT34418.1	34.59	88	29	29	12500000000	12100000000	15900000000	11400000000	14800000000	3590000000	3480000000	5680000000	3850000000	4270000000	1.00:0.97:1.58:1.07:1.19	43625	elongation factor Tu [Caldalkalibacillus thermarum TA2.A1]
180	564	QZT34844.1	34.55	26	10	10	26400000	21900000	16900000	19400000	16900000	14800000	12100000	9720000	10700000	9580000	1.00:0.82:0.66:0.73:0.65	68088	M3 family oligoendopeptidase [Caldalkalibacillus thermarum TA2.A1]
1046	2231	QZT34636.1	34.55	38	2	2	15300000	15800000	13800000	16700000	3070000	15300000	15800000	13800000	16700000	3070000	1.00:1.03:0.90:1.09:0.20	11985	hypothetical protein HUR95_04650 [Caldalkalibacillus thermarum TA2.A1]
730	527	QZT32525.1	34.52	36	6	6	33300000	26800000	28800000	26000000	19200000	28000000	21000000	21100000	20500000	14000000	1.00:0.75:0.75:0.73:0.50	28819	NAD-dependent deacylase [Caldalkalibacillus thermarum TA2.A1]
398	6663	QZT35060.1	34.49	35	9	9	332000000	255000000	179000000	198000000	272000000	196000000	140000000	94700000	116000000	154000000	1.00:0.71:0.48:0.59:0.78	26472	5'-methylthioadenosine/adenosylhomocysteine nucleosidase [Caldalkalibacillus thermarum TA2.A1]
714	3436	QZT34260.1	34.42	17	6	6	4010000	4530000	6240000	6840000	12500000	2460000	2530000	4680000	4950000	9200000	1.00:1.03:1.90:2.01:3.75	50640	replicative DNA helicase [Caldalkalibacillus thermarum TA2.A1]
698	371	QZT35256.1	34.42	69	11	11	450000000	220000000	140000000	283000000	102000000	238000000	121000000	77500000	140000000	51400000	1.00:0.51:0.32:0.59:0.22	17723	thioredoxin-dependent thiol peroxidase [Caldalkalibacillus thermarum TA2.A1]
453	927	QZT33757.1	34.38	74	10	10	193000000	57000000	184000000	189000000	331000000	132000000	41900000	134000000	142000000	235000000	1.00:0.32:1.01:1.07:1.78	16974	SUF system NifU family Fe-S cluster assembly protein [Caldalkalibacillus thermarum TA2.A1]
305	6917	QZT34187.1	34.37	37	10	10	40000000	45200000	76100000	66700000	51200000	27000000	29900000	53600000	46500000	35300000	1.00:1.11:1.98:1.72:1.31	40491	peptide chain release factor 1 [Caldalkalibacillus thermarum TA2.A1]
231	577	QZT33642.1	34.34	10	4	4	7910000	1660000	1460000	1350000	48000000	7050000	1490000	1360000	1150000	41700000	1.00:0.21:0.19:0.16:5.91	75550	cadmium-translocating P-type ATPase [Caldalkalibacillus thermarum TA2.A1]
744	600	QZT35096.1	34.28	33	5	5	13100000	17100000	13100000	10600000	28200000	9880000	13000000	10300000	8350000	21500000	1.00:1.32:1.04:0.85:2.17	30218	NAD kinase [Caldalkalibacillus thermarum TA2.A1]
125	152	QZT33531.1	34.17	68	17	17	860000000	835000000	1010000000	597000000	1500000000	274000000	271000000	345000000	193000000	463000000	1.00:0.99:1.26:0.71:1.69	47081	glutamate-1-semialdehyde 2 1-aminomutase [Caldalkalibacillus thermarum TA2.A1]
990	6551	QZT34885.1	34.04	52	4	4	39500000	59000000	41700000	35000000	9380000	36500000	54800000	38900000	33100000	9050000	1.00:1.50:1.06:0.91:0.25	12317	metal-sensitive transcriptional regulator [Caldalkalibacillus thermarum TA2.A1]
1175	791	QZT34391.1	34.03	4	2	2	672000	435000	777000	602000	948000	672000	435000	777000	602000	948000	1.00:0.65:1.16:0.90:1.41	50030	DNA repair protein RadA [Caldalkalibacillus thermarum TA2.A1]
889	822	QZT33338.1	33.96	79	6	6	220000000	79200000	85100000	66700000	101000000	168000000	61200000	59300000	45200000	75300000	1.00:0.36:0.35:0.27:0.45	12698	redoxin domain-containing protein [Caldalkalibacillus thermarum TA2.A1]
26	790	QZT33527.1	33.94	54	38	38	180000000	215000000	237000000	242000000	256000000	48800000	58700000	75500000	83400000	86100000	1.00:1.20:1.54:1.71:1.76	103003	valine--tRNA ligase [Caldalkalibacillus thermarum TA2.A1]
463	712	QZT33153.1	33.9	38	10	10	14400000	21200000	29500000	33800000	32200000	8800000	12700000	16500000	20200000	20000000	1.00:1.44:1.88:2.30:2.27	41912	bifunctional diaminohydroxyphosphoribosylaminopyrimidine deaminase/5-amino-6-(5-phosphoribosylamino)uracil reductase RibD [Caldalkalibacillus thermarum TA2.A1]
444	41253	QZT32935.1	33.88	92	7	7	843000000	702000000	452000000	449000000	371000000	546000000	495000000	305000000	293000000	261000000	1.00:0.91:0.56:0.54:0.48	9014	RNA chaperone Hfq [Caldalkalibacillus thermarum TA2.A1]
607	474	QZT34442.1	33.81	49	8	8	108000000	45600000	52600000	80500000	40100000	65900000	28800000	33800000	50800000	24800000	1.00:0.44:0.51:0.77:0.38	27209	type I methionyl aminopeptidase [Caldalkalibacillus thermarum TA2.A1]
689	240	QZT33182.1	33.81	22	4	4	72400000	63600000	65200000	69600000	25800000	63700000	54900000	53400000	57800000	20600000	1.00:0.86:0.84:0.91:0.32	31224	deoxyribonuclease IV [Caldalkalibacillus thermarum TA2.A1]
394	271	QZT33508.1	33.71	49	12	12	96600000	119000000	102000000	111000000	74800000	49800000	64100000	53800000	57700000	40400000	1.00:1.29:1.08:1.16:0.81	28902	septum site-determining protein MinD [Caldalkalibacillus thermarum TA2.A1]
67	114	QZT34992.1	33.57	36	24	24	108000000	127000000	134000000	131000000	324000000	42100000	48700000	44800000	46100000	98700000	1.00:1.16:1.07:1.10:2.35	89608	phenylalanine--tRNA ligase subunit beta [Caldalkalibacillus thermarum TA2.A1]
306	890	QZT32901.1	33.55	66	12	12	279000000	204000000	203000000	293000000	457000000	206000000	161000000	137000000	192000000	351000000	1.00:0.78:0.67:0.94:1.71	25168	peroxiredoxin [Caldalkalibacillus thermarum TA2.A1]
452	19020	QZT32601.1	33.52	82	13	13	842000000	921000000	597000000	505000000	353000000	478000000	511000000	354000000	293000000	180000000	1.00:1.07:0.74:0.61:0.38	18782	inorganic diphosphatase [Caldalkalibacillus thermarum TA2.A1]
551	1104	QZT35164.1	33.48	26	6	6	11500000	6550000	4680000	3570000	8880000	8630000	5340000	3900000	3090000	7010000	1.00:0.62:0.45:0.36:0.81	35296	4-hydroxythreonine-4-phosphate dehydrogenase PdxA [Caldalkalibacillus thermarum TA2.A1]
137	138	QZT33343.1	33.48	63	26	26	1260000000	1240000000	1370000000	1660000000	1770000000	449000000	453000000	547000000	666000000	625000000	1.00:1.01:1.22:1.48:1.39	49865	dihydrolipoyl dehydrogenase [Caldalkalibacillus thermarum TA2.A1]
1155	978	QZT33002.1	33.46	18	2	2	8490000	10800000	11200000	7180000	32500000	8490000	10800000	11200000	7180000	32500000	1.00:1.27:1.32:0.85:3.83	17747	chemotaxis protein CheW [Caldalkalibacillus thermarum TA2.A1]
52	574	QZT34942.1	33.46	63	27	27	165000000	224000000	483000000	415000000	579000000	68200000	95000000	198000000	177000000	240000000	1.00:1.39:2.90:2.60:3.51	62924	pyruvate kinase [Caldalkalibacillus thermarum TA2.A1]
563	631	QZT34184.1	33.32	30	6	6	28900000	36200000	68700000	62000000	47900000	22800000	29400000	56700000	50900000	40500000	1.00:1.29:2.49:2.24:1.78	41256	threonylcarbamoyl-AMP synthase [Caldalkalibacillus thermarum TA2.A1]
719	1732	QZT34245.1	33.21	24	5	5	64900000	60000000	43900000	42100000	32400000	48400000	44200000	32900000	30400000	24400000	1.00:0.91:0.68:0.63:0.50	32844	carbon-nitrogen hydrolase family protein [Caldalkalibacillus thermarum TA2.A1]
824	464	QZT33306.1	33.13	19	4	4	13900000	12500000	5890000	6300000	23000000	12300000	11000000	4650000	5000000	18500000	1.00:0.89:0.38:0.41:1.50	28926	phosphonate ABC transporter ATP-binding protein [Caldalkalibacillus thermarum TA2.A1]
293	300	QZT34299.1	33.12	58	14	14	116000000	155000000	176000000	125000000	292000000	48000000	59800000	69400000	45800000	108000000	1.00:1.25:1.45:0.95:2.26	42110	DNA polymerase III subunit beta [Caldalkalibacillus thermarum TA2.A1]
791	721	QZT35147.1	33.11	18	3	3	4990000	6000000	5270000	4370000	9020000	4990000	6000000	5270000	4370000	9020000	1.00:1.20:1.06:0.88:1.81	25410	TrkA family potassium uptake protein [Caldalkalibacillus thermarum TA2.A1]
1124	230	QZT32794.1	33.08	74	5	5	94800000	74100000	59200000	127000000	123000000	84700000	66700000	54600000	111000000	105000000	1.00:0.79:0.64:1.31:1.23	9747	DUF370 domain-containing protein [Caldalkalibacillus thermarum TA2.A1]
720	149	QZT35208.1	33.06	12	3	3	2410000	2180000	4200000	4550000	6310000	2410000	2180000	4200000	4550000	6310000	1.00:0.91:1.75:1.89:2.62	35787	lysophospholipase [Caldalkalibacillus thermarum TA2.A1]
318	150	QZT34586.1	33.02	80	10	10	395000000	456000000	225000000	259000000	88500000	240000000	267000000	130000000	145000000	52100000	1.00:1.11:0.54:0.60:0.22	17637	cyclic pyranopterin monophosphate synthase MoaC [Caldalkalibacillus thermarum TA2.A1]
535	893	QZT33196.1	32.93	61	12	12	117000000	89200000	145000000	138000000	191000000	48000000	34300000	63900000	63700000	77600000	1.00:0.71:1.33:1.33:1.62	26885	acetoin utilization AcuB family protein [Caldalkalibacillus thermarum TA2.A1]
941	482	QZT33662.1	32.8	17	2	2	22300000	25400000	34400000	47100000	19800000	22300000	25400000	34400000	47100000	19800000	1.00:1.14:1.54:2.11:0.89	14553	hypothetical protein HUR95_15765 [Caldalkalibacillus thermarum TA2.A1]
645	727	QZT35267.1	32.78	79	8	8	186000000	233000000	257000000	301000000	181000000	128000000	159000000	182000000	206000000	122000000	1.00:1.25:1.42:1.61:0.96	13606	RidA family protein [Caldalkalibacillus thermarum TA2.A1]
1352	586	QZT34284.1	32.72	35	3	3	6300000	3570000	10100000	11900000	8170000	5870000	3350000	9300000	10700000	7220000	1.00:0.57:1.58:1.82:1.23	8171	DUF951 domain-containing protein [Caldalkalibacillus thermarum TA2.A1]
626	977	QZT32887.1	32.63	21	4	4	4490000	1950000	2660000	2470000	7550000	4020000	1780000	2400000	2150000	6710000	1.00:0.44:0.60:0.53:1.67	36513	nitronate monooxygenase [Caldalkalibacillus thermarum TA2.A1]
1102	22183	QZT35335.1	32.46	90	5	5	381000000	307000000	226000000	214000000	122000000	301000000	236000000	173000000	166000000	88900000	1.00:0.79:0.58:0.55:0.30	7415	copper chaperone CopZ [Caldalkalibacillus thermarum TA2.A1]
1023	964	QZT34607.1	32.44	11	2	2	2370000	2160000	2310000	2780000	7370000	2370000	2160000	2310000	2780000	7370000	1.00:0.91:0.97:1.17:3.10	28807	RNA methyltransferase [Caldalkalibacillus thermarum TA2.A1]
163	3402	QZT35062.1	32.4	53	15	15	109000000	140000000	109000000	142000000	88800000	42400000	58200000	41800000	63800000	38600000	1.00:1.37:0.99:1.51:0.91	46874	tyrosine--tRNA ligase [Caldalkalibacillus thermarum TA2.A1]
35	91	QZT34616.1	32.39	63	29	29	506000000	502000000	533000000	311000000	240000000	147000000	157000000	151000000	90800000	65900000	1.00:1.07:1.03:0.62:0.45	81464	phosphoribosylformylglycinamidine synthase subunit PurL [Caldalkalibacillus thermarum TA2.A1]
112	1548	QZT32625.1	32.36	69	25	25	563000000	573000000	377000000	386000000	367000000	223000000	232000000	160000000	164000000	156000000	1.00:1.04:0.72:0.73:0.70	42372	30S ribosomal protein S1 [Caldalkalibacillus thermarum TA2.A1]
168	130	QZT33205.1	32.35	56	14	14	65900000	113000000	182000000	172000000	33700000	31500000	57800000	86000000	75100000	15200000	1.00:1.83:2.73:2.38:0.48	44486	TIGR04053 family radical SAM/SPASM domain-containing protein [Caldalkalibacillus thermarum TA2.A1]
219	824	QZT34584.1	32	51	11	11	239000000	269000000	367000000	281000000	222000000	169000000	189000000	229000000	194000000	143000000	1.00:1.12:1.35:1.15:0.85	32822	polyamine aminopropyltransferase [Caldalkalibacillus thermarum TA2.A1]
102	14	QZT32673.1	31.92	76	18	18	861000000	1180000000	568000000	441000000	395000000	359000000	498000000	255000000	188000000	177000000	1.00:1.39:0.71:0.52:0.49	36708	thiamine pyrophosphate-dependent dehydrogenase E1 component subunit alpha [Caldalkalibacillus thermarum TA2.A1]
669	2062	QZT34553.1	31.9	22	6	6	6000000	5040000	8090000	6630000	7440000	4530000	4010000	6170000	5480000	6660000	1.00:0.89:1.36:1.21:1.47	44538	alanine racemase [Caldalkalibacillus thermarum TA2.A1]
103	462	QZT32807.1	31.88	34	14	14	114000000	125000000	110000000	48700000	39700000	63900000	74000000	61900000	32000000	24800000	1.00:1.16:0.97:0.50:0.39	61967	DAK2 domain-containing protein [Caldalkalibacillus thermarum TA2.A1]
851	6921	QZT33120.1	31.81	29	5	5	17200000	19700000	22000000	17800000	23200000	12500000	14700000	14600000	13700000	18400000	1.00:1.18:1.17:1.10:1.48	34819	16S rRNA (cytosine(1402)-N(4))-methyltransferase RsmH [Caldalkalibacillus thermarum TA2.A1]
576	3942	QZT33727.1	31.77	34	7	7	14100000	14500000	19100000	13900000	37200000	9030000	9800000	13000000	9630000	25000000	1.00:1.09:1.44:1.07:2.77	30520	alanine racemase [Caldalkalibacillus thermarum TA2.A1]
771	419	QZT34615.1	31.73	27	5	5	109000000	106000000	125000000	74600000	39900000	74000000	70000000	84600000	47900000	25100000	1.00:0.95:1.14:0.65:0.34	25044	phosphoribosylformylglycinamidine synthase subunit PurQ [Caldalkalibacillus thermarum TA2.A1]
521	3848	QZT33393.1	31.59	57	8	8	58800000	80900000	82200000	73000000	137000000	41000000	56100000	51600000	48000000	83600000	1.00:1.37:1.26:1.17:2.04	23640	deoxyribose-phosphate aldolase [Caldalkalibacillus thermarum TA2.A1]
1310	9767	QZT33963.1	31.58	23	2	2	3640000	3190000	6960000	5700000	6190000	3640000	3190000	6960000	5700000	6190000	1.00:0.88:1.91:1.57:1.70	17579	flagellar assembly protein FliW [Caldalkalibacillus thermarum TA2.A1]
51	111	QZT33839.1	31.48	52	28	28	605000000	588000000	365000000	413000000	309000000	143000000	138000000	78000000	85600000	63600000	1.00:0.97:0.55:0.60:0.45	66523	acyl-CoA dehydrogenase family protein [Caldalkalibacillus thermarum TA2.A1]
649	2619	QZT33359.1	31.47	52	11	11	58300000	62400000	44100000	50000000	31100000	36300000	38500000	26700000	30600000	19900000	1.00:1.06:0.74:0.84:0.55	26701	class I SAM-dependent methyltransferase [Caldalkalibacillus thermarum TA2.A1]
277	543	QZT34029.1	31.36	52	20	20	427000000	506000000	658000000	783000000	853000000	165000000	207000000	292000000	350000000	317000000	1.00:1.26:1.78:2.13:1.93	44002	methionine adenosyltransferase [Caldalkalibacillus thermarum TA2.A1]
37	29	QZT35218.1	31.34	36	24	24	82200000	87500000	93900000	102000000	95800000	26500000	27700000	33700000	30900000	32500000	1.00:1.04:1.27:1.17:1.23	96942	preprotein translocase subunit SecA [Caldalkalibacillus thermarum TA2.A1]
60	116	QZT33346.1	31.33	61	16	16	741000000	746000000	603000000	632000000	636000000	286000000	269000000	227000000	231000000	202000000	1.00:0.94:0.79:0.81:0.70	40376	pyruvate dehydrogenase (acetyl-transferring) E1 component subunit alpha [Caldalkalibacillus thermarum TA2.A1]
190	683	QZT34238.1	31.32	32	15	15	111000000	93600000	70700000	91100000	37800000	44700000	37800000	26300000	33100000	14000000	1.00:0.85:0.59:0.74:0.31	74683	AMP-binding protein [Caldalkalibacillus thermarum TA2.A1]
1372	673	QZT33501.1	31.17	24	2	2	41200000	29700000	13100000	11500000	15800000	41200000	29700000	13100000	11500000	15800000	1.00:0.72:0.32:0.28:0.38	10339	50S ribosomal protein L27 [Caldalkalibacillus thermarum TA2.A1]
17	221	QZT35160.1	31.17	17	14	14	42800000	46800000	43200000	50400000	26000000	15500000	19400000	19900000	26400000	13500000	1.00:1.26:1.29:1.71:0.87	127119	AAA family ATPase [Caldalkalibacillus thermarum TA2.A1]
1097	6955	QZT34696.1	31.11	32	4	4	36600000	37600000	19800000	29600000	23400000	35700000	37100000	19200000	28700000	22700000	1.00:1.04:0.54:0.80:0.63	17853	peroxide-responsive transcriptional repressor PerR [Caldalkalibacillus thermarum TA2.A1]
1126	514	QZT33798.1	31.07	15	2	2	2300000	2770000	4520000	4800000	6650000	2300000	2770000	4520000	4800000	6650000	1.00:1.20:1.96:2.09:2.89	17249	bifunctional adenosylcobinamide kinase/adenosylcobinamide-phosphate guanylyltransferase [Caldalkalibacillus thermarum TA2.A1]
43	1121	QZT32779.1	31.02	19	15	14	15200000	91300000	54600000	39700000	32900000	5840000	32800000	18000000	14100000	14200000	1.00:5.61:3.08:2.41:2.43	118393	carbamoyl-phosphate synthase large subunit [Caldalkalibacillus thermarum TA2.A1]
498	235	QZT33915.1	30.89	52	7	7	620000000	686000000	234000000	302000000	255000000	461000000	521000000	181000000	232000000	191000000	1.00:1.13:0.39:0.50:0.41	23585	SCO family protein [Caldalkalibacillus thermarum TA2.A1]
503	839	QZT34655.1	30.88	17	4	4	6630000	9140000	11600000	15500000	7520000	5700000	7950000	10000000	12800000	6490000	1.00:1.39:1.76:2.24:1.14	32685	diacylglycerol kinase [Caldalkalibacillus thermarum TA2.A1]
557	2344	QZT35235.1	30.83	25	6	6	10900000	13000000	17200000	15100000	25400000	8800000	9970000	12100000	11300000	18200000	1.00:1.13:1.38:1.29:2.07	37271	5-dehydro-2-deoxygluconokinase [Caldalkalibacillus thermarum TA2.A1]
415	2393	QZT32778.1	30.82	36	8	8	9900000	53400000	36300000	26200000	15400000	6670000	33900000	23900000	16600000	10300000	1.00:5.09:3.58:2.48:1.54	41419	carbamoyl phosphate synthase small subunit [Caldalkalibacillus thermarum TA2.A1]
961	524	QZT34656.1	30.74	10	3	3	33500000	43100000	26100000	23800000	21400000	28000000	34100000	22500000	20500000	18100000	1.00:1.22:0.80:0.73:0.65	33706	DUF1002 domain-containing protein [Caldalkalibacillus thermarum TA2.A1]
304	3756	QZT34544.1	30.69	43	12	12	47500000	55200000	72000000	62300000	62900000	24000000	31000000	43000000	34500000	31800000	1.00:1.29:1.79:1.44:1.33	38614	aldo/keto reductase [Caldalkalibacillus thermarum TA2.A1]
101	137	QZT32538.1	30.61	29	17	17	77000000	82500000	75200000	130000000	72600000	31500000	36300000	27300000	42800000	24500000	1.00:1.15:0.87:1.36:0.78	97909	penicillin-binding protein 1A [Caldalkalibacillus thermarum TA2.A1]
129	17	QZT32969.1	30.58	62	25	24	178000000	185000000	193000000	196000000	361000000	59500000	66800000	68600000	67900000	118000000	1.00:1.12:1.15:1.14:1.98	61553	ribonuclease J [Caldalkalibacillus thermarum TA2.A1]
185	338	QZT32761.1	30.44	26	11	11	32600000	21500000	37000000	58000000	76200000	13800000	10500000	18700000	29700000	41000000	1.00:0.76:1.35:2.15:2.96	60723	malate synthase A [Caldalkalibacillus thermarum TA2.A1]
33	2	QZT34166.1	30.37	72	26	26	1790000000	2070000000	2710000000	2110000000	2930000000	533000000	637000000	869000000	668000000	879000000	1.00:1.19:1.63:1.25:1.65	50254	F0F1 ATP synthase subunit beta [Caldalkalibacillus thermarum TA2.A1]
648	2778	QZT33933.1	30.28	7	3	3	12200000	11500000	20000000	17000000	18800000	12200000	11500000	20000000	17000000	18800000	1.00:0.94:1.63:1.39:1.54	42046	peptide chain release factor 2 [Caldalkalibacillus thermarum TA2.A1]
99	736	QZT34951.1	30.18	7	4	4	6010000	4890000	4920000	2260000	15300000	4810000	4020000	4190000	2120000	11600000	1.00:0.84:0.87:0.44:2.40	99822	DNA polymerase I [Caldalkalibacillus thermarum TA2.A1]
872	941	QZT33475.1	30.1	55	4	4	8530000	8050000	11800000	21800000	13800000	8310000	7830000	11500000	21500000	13600000	1.00:0.94:1.38:2.58:1.63	16483	D-tyrosyl-tRNA(Tyr) deacylase [Caldalkalibacillus thermarum TA2.A1]
111	1203	QZT32788.1	30.09	32	13	13	79500000	51500000	77100000	80700000	164000000	33900000	23300000	33100000	32900000	66100000	1.00:0.69:0.98:0.97:1.95	59062	carboxypeptidase M32 [Caldalkalibacillus thermarum TA2.A1]
380	340	QZT35248.1	30.08	71	13	13	492000000	530000000	399000000	296000000	217000000	248000000	270000000	195000000	148000000	109000000	1.00:1.09:0.79:0.60:0.44	23377	fructose-6-phosphate aldolase [Caldalkalibacillus thermarum TA2.A1]
48	45	QZT32976.1	30.05	39	24	24	161000000	183000000	169000000	186000000	255000000	47600000	61200000	59200000	74200000	105000000	1.00:1.28:1.24:1.56:2.20	78970	polyribonucleotide nucleotidyltransferase [Caldalkalibacillus thermarum TA2.A1]
1028	1285	QZT34943.1	30.04	33	3	3	9390000	12300000	17800000	19400000	28800000	9390000	12300000	17800000	19400000	28800000	1.00:1.31:1.89:2.07:3.06	15824	acyl-CoA thioesterase [Caldalkalibacillus thermarum TA2.A1]
97	3653	QZT35495.1	30.01	64	27	27	752000000	772000000	597000000	609000000	424000000	270000000	283000000	228000000	237000000	167000000	1.00:1.05:0.84:0.88:0.62	53560	leucyl aminopeptidase [Caldalkalibacillus thermarum TA2.A1]
390	1370	QZT34375.1	29.84	58	12	12	39900000	41700000	64800000	50400000	83700000	19200000	20200000	26400000	18800000	34200000	1.00:1.05:1.38:0.98:1.78	30804	dihydropteroate synthase [Caldalkalibacillus thermarum TA2.A1]
1070	3198	QZT33493.1	29.81	24	3	3	5790000	7770000	11100000	15200000	20000000	5790000	7770000	11100000	15200000	20000000	1.00:1.34:1.92:2.63:3.45	26954	YebC/PmpR family DNA-binding transcriptional regulator [Caldalkalibacillus thermarum TA2.A1]
161	3762	QZT35054.1	29.74	65	19	19	462000000	421000000	404000000	279000000	147000000	178000000	170000000	147000000	101000000	55600000	1.00:0.95:0.83:0.57:0.31	41948	aminopeptidase [Caldalkalibacillus thermarum TA2.A1]
540	65	QZT34687.1	29.7	36	6	6	55500000	48700000	77200000	77500000	42400000	41700000	36100000	53800000	56500000	28300000	1.00:0.86:1.29:1.35:0.68	33046	TIGR01777 family oxidoreductase [Caldalkalibacillus thermarum TA2.A1]
755	391	QZT35056.1	29.58	45	8	8	111000000	307000000	275000000	200000000	41600000	72300000	198000000	187000000	136000000	26000000	1.00:2.74:2.58:1.88:0.36	13698	YtxH domain-containing protein [Caldalkalibacillus thermarum TA2.A1]
595	353	QZT34348.1	29.57	50	7	7	313000000	278000000	515000000	416000000	343000000	255000000	221000000	432000000	351000000	295000000	1.00:0.87:1.69:1.38:1.16	23167	50S ribosomal protein L25/general stress protein Ctc [Caldalkalibacillus thermarum TA2.A1]
1013	3302	QZT33272.1	29.42	48	4	4	57200000	46700000	42400000	42600000	36500000	55500000	45000000	40300000	41600000	35800000	1.00:0.81:0.73:0.75:0.64	14681	6-carboxytetrahydropterin synthase [Caldalkalibacillus thermarum TA2.A1]
47	107	QZT34888.1	29.38	26	17	17	93300000	64600000	43100000	53200000	50200000	34300000	27200000	16100000	21300000	18600000	1.00:0.79:0.47:0.62:0.54	107807	2-oxoglutarate dehydrogenase E1 component [Caldalkalibacillus thermarum TA2.A1]
475	193	QZT33517.1	29.38	24	6	6	18200000	34500000	43900000	19200000	86200000	9870000	21200000	29000000	11900000	58200000	1.00:2.15:2.93:1.20:5.90	37519	pilus assembly protein PilM [Caldalkalibacillus thermarum TA2.A1]
905	954	QZT34207.1	29.37	16	3	3	3250000	2920000	3670000	1880000	4450000	3250000	2920000	3670000	1880000	4450000	1.00:0.90:1.13:0.58:1.37	34066	D-cysteine desulfhydrase family protein [Caldalkalibacillus thermarum TA2.A1]
854	2439	QZT33174.1	29.36	12	3	3	1690000	1710000	1090000	1290000	3160000	1690000	1710000	1090000	1290000	3160000	1.00:1.01:0.64:0.76:1.87	46050	SAM-dependent methyltransferase [Caldalkalibacillus thermarum TA2.A1]
474	3856	QZT32942.1	29.36	39	5	5	134000000	138000000	97300000	112000000	49500000	97300000	98700000	77900000	89900000	41500000	1.00:1.01:0.80:0.92:0.43	16417	YlbF family regulator [Caldalkalibacillus thermarum TA2.A1]
781	6610	QZT34098.1	29.32	24	5	5	12600000	15700000	28100000	17500000	31500000	10100000	12500000	20900000	12400000	22800000	1.00:1.24:2.07:1.23:2.26	30812	5-deoxy-glucuronate isomerase [Caldalkalibacillus thermarum TA2.A1]
828	246	QZT32728.1	29.22	60	6	6	161000000	170000000	106000000	72700000	73700000	108000000	114000000	72500000	51300000	49700000	1.00:1.05:0.67:0.47:0.46	17562	YpiF family protein [Caldalkalibacillus thermarum TA2.A1]
325	547	QZT33363.1	29.21	12	5	5	2380000	2590000	2560000	2820000	3690000	1340000	1220000	1770000	2390000	2820000	1.00:0.91:1.32:1.78:2.10	71259	DNA primase [Caldalkalibacillus thermarum TA2.A1]
517	119	QZT32894.1	29.2	13	5	5	5710000	5590000	4140000	5570000	13900000	4810000	4540000	3120000	4200000	9430000	1.00:0.94:0.65:0.87:1.96	62900	thiol reductant ABC exporter subunit CydD [Caldalkalibacillus thermarum TA2.A1]
377	351	QZT33282.1	29.05	64	15	15	348000000	330000000	264000000	241000000	230000000	153000000	150000000	135000000	127000000	114000000	1.00:0.98:0.88:0.83:0.75	23093	thiamine phosphate synthase [Caldalkalibacillus thermarum TA2.A1]
933	704	QZT34421.1	28.98	27	3	3	119000000	105000000	79100000	57400000	52900000	119000000	105000000	79100000	57400000	52900000	1.00:0.88:0.67:0.48:0.45	22781	50S ribosomal protein L4 [Caldalkalibacillus thermarum TA2.A1]
836	646	QZT33377.1	28.98	34	5	5	36900000	24700000	25200000	39400000	20600000	31700000	20800000	22200000	35600000	18300000	1.00:0.66:0.70:1.12:0.58	19513	hypothetical protein HUR95_14140 [Caldalkalibacillus thermarum TA2.A1]
511	769	QZT32670.1	28.96	33	5	5	57000000	78600000	27900000	17900000	8720000	45600000	62300000	21100000	14400000	6420000	1.00:1.37:0.46:0.32:0.14	32150	phosphate butyryltransferase [Caldalkalibacillus thermarum TA2.A1]
495	194	QZT34491.1	28.95	42	8	8	70900000	160000000	217000000	185000000	97700000	49700000	104000000	150000000	129000000	70900000	1.00:2.08:3.02:2.60:1.43	32075	arginase [Caldalkalibacillus thermarum TA2.A1]
160	156	QZT32696.1	28.95	40	19	19	325000000	388000000	192000000	146000000	217000000	117000000	134000000	67100000	54400000	77100000	1.00:1.15:0.58:0.47:0.66	54750	aminomethyl-transferring glycine dehydrogenase subunit GcvPB [Caldalkalibacillus thermarum TA2.A1]
337	417	QZT34895.1	28.92	21	9	9	14000000	18500000	22700000	13400000	33400000	7080000	9030000	11200000	6410000	15800000	1.00:1.28:1.58:0.91:2.23	61932	formate--tetrahydrofolate ligase [Caldalkalibacillus thermarum TA2.A1]
1042	2173	QZT35117.1	28.9	21	4	4	7290000	5470000	4510000	3540000	4250000	6840000	5360000	3940000	3310000	4110000	1.00:0.78:0.58:0.48:0.60	30330	NAD kinase [Caldalkalibacillus thermarum TA2.A1]
40	248	QZT34654.1	28.69	61	26	26	434000000	489000000	478000000	471000000	367000000	108000000	129000000	136000000	145000000	94800000	1.00:1.19:1.26:1.34:0.88	53755	Asp-tRNA(Asn)/Glu-tRNA(Gln) amidotransferase subunit GatB [Caldalkalibacillus thermarum TA2.A1]
320	345	QZT33741.1	28.65	57	15	15	101000000	79300000	133000000	163000000	176000000	57500000	44600000	75200000	96400000	101000000	1.00:0.78:1.31:1.67:1.75	34817	lipoyl synthase [Caldalkalibacillus thermarum TA2.A1]
920	2885	QZT33750.1	28.63	6	2	2	1510000	1380000	1920000	1890000	288000	1510000	1380000	1920000	1890000	288000	1.00:0.92:1.27:1.25:0.19	55515	bifunctional metallophosphatase/5'-nucleotidase [Caldalkalibacillus thermarum TA2.A1]
251	1985	QZT33151.1	28.56	54	20	20	102000000	144000000	172000000	195000000	213000000	53600000	73600000	94200000	93300000	103000000	1.00:1.37:1.76:1.74:1.93	44750	bifunctional 3 4-dihydroxy-2-butanone-4-phosphate synthase/GTP cyclohydrolase II [Caldalkalibacillus thermarum TA2.A1]
768	1550	QZT33370.1	28.56	51	5	5	46900000	52900000	45400000	46600000	68400000	42600000	47900000	41500000	42600000	60500000	1.00:1.12:0.97:1.00:1.42	14746	cytidine deaminase [Caldalkalibacillus thermarum TA2.A1]
671	1617	QZT32653.1	28.56	76	9	9	91200000	45900000	22900000	44200000	23200000	58400000	30100000	14200000	25600000	13300000	1.00:0.51:0.24:0.44:0.23	14856	transcription antitermination factor NusB [Caldalkalibacillus thermarum TA2.A1]
1062	2533	QZT34261.1	28.47	29	5	5	42100000	26900000	29400000	30200000	56300000	28700000	17500000	21100000	20200000	38000000	1.00:0.61:0.73:0.70:1.32	16460	50S ribosomal protein L9 [Caldalkalibacillus thermarum TA2.A1]
458	1416	QZT32631.1	28.47	17	6	6	9710000	11000000	9850000	9980000	19500000	6860000	7380000	6370000	7200000	14000000	1.00:1.08:0.93:1.05:2.04	49192	ribosome biogenesis GTPase Der [Caldalkalibacillus thermarum TA2.A1]
1580	55544	QZT32902.1	28.41	34	2	2	15000000	5920000	9550000	19700000	10400000	15000000	5920000	9550000	19700000	10400000	1.00:0.40:0.64:1.31:0.69	8077	hypothetical protein HUR95_11180 [Caldalkalibacillus thermarum TA2.A1]
621	472	QZT35265.1	28.36	73	9	9	1500000000	1210000000	628000000	987000000	776000000	1260000000	1050000000	530000000	771000000	641000000	1.00:0.84:0.42:0.61:0.51	11132	AbrB/MazE/SpoVT family DNA-binding domain-containing protein [Caldalkalibacillus thermarum TA2.A1]
1441	12758	QZT32815.1	28.27	46	3	3	141000000	97700000	48700000	71200000	86300000	126000000	87600000	45500000	64900000	77200000	1.00:0.69:0.36:0.51:0.61	8815	acyl carrier protein [Caldalkalibacillus thermarum TA2.A1]
147	1099	QZT34246.1	28.26	57	18	18	169000000	163000000	149000000	130000000	132000000	79400000	76500000	70100000	59100000	58000000	1.00:0.96:0.88:0.74:0.73	52119	NADP-dependent phosphogluconate dehydrogenase [Caldalkalibacillus thermarum TA2.A1]
27	96	QZT34290.1	28.03	62	32	32	237000000	302000000	398000000	436000000	534000000	60900000	77200000	109000000	123000000	133000000	1.00:1.27:1.80:2.02:2.19	70653	tRNA uridine-5-carboxymethylaminomethyl(34) synthesis enzyme MnmG [Caldalkalibacillus thermarum TA2.A1]
470	6857	QZT34370.1	27.97	45	7	7	104000000	124000000	88400000	68100000	86100000	75300000	83700000	59100000	46100000	59600000	1.00:1.11:0.78:0.61:0.79	33247	cysteine synthase A [Caldalkalibacillus thermarum TA2.A1]
1147	1080	QZT34172.1	27.97	25	5	5	11800000	12200000	17900000	12300000	19500000	9340000	9390000	13900000	9150000	15100000	1.00:1.01:1.49:0.98:1.62	26651	F0F1 ATP synthase subunit A [Caldalkalibacillus thermarum TA2.A1]
364	242	QZT34420.1	27.93	45	7	7	94800000	76300000	41700000	37600000	38800000	66000000	51200000	28900000	26200000	25800000	1.00:0.78:0.44:0.40:0.39	22785	50S ribosomal protein L3 [Caldalkalibacillus thermarum TA2.A1]
1314	1041	QZT32729.1	27.88	19	4	4	46700000	49600000	43600000	42100000	20200000	45700000	48800000	43000000	41600000	20000000	1.00:1.07:0.94:0.91:0.44	19641	ubiquinol-cytochrome c reductase iron-sulfur subunit [Caldalkalibacillus thermarum TA2.A1]
701	2974	QZT34183.1	27.88	56	6	6	85000000	81300000	66000000	92000000	65200000	60800000	59600000	49500000	68200000	52200000	1.00:0.98:0.81:1.12:0.86	16912	low molecular weight protein arginine phosphatase [Caldalkalibacillus thermarum TA2.A1]
253	132	QZT33809.1	27.88	22	10	10	14700000	16600000	25800000	22400000	25800000	8570000	9690000	13500000	11700000	13600000	1.00:1.13:1.58:1.36:1.59	65354	plasmid pRiA4b ORF-3 family protein [Caldalkalibacillus thermarum TA2.A1]
757	1626	QZT33307.1	27.83	22	4	4	4410000	4030000	3920000	4610000	9940000	3990000	3550000	3250000	4280000	9260000	1.00:0.89:0.81:1.07:2.32	32174	HAD family hydrolase [Caldalkalibacillus thermarum TA2.A1]
1322	169	QZT34813.1	27.76	18	3	3	4830000	3270000	6550000	6720000	20000000	4830000	3270000	6550000	6720000	20000000	1.00:0.68:1.36:1.39:4.13	37963	TAXI family TRAP transporter solute-binding subunit [Caldalkalibacillus thermarum TA2.A1]
803	481	QZT34388.1	27.7	53	5	5	23800000	16900000	45900000	51000000	29900000	20600000	15400000	41300000	41000000	24900000	1.00:0.75:2.00:1.99:1.21	19587	UvrB/UvrC motif-containing protein [Caldalkalibacillus thermarum TA2.A1]
303	120	QZT33032.1	27.68	68	18	18	1270000000	1080000000	1060000000	902000000	1220000000	574000000	498000000	587000000	476000000	674000000	1.00:0.87:1.02:0.83:1.17	31579	succinate--CoA ligase subunit alpha [Caldalkalibacillus thermarum TA2.A1]
907	2203	QZT34212.1	27.61	34	8	8	20300000	25400000	27800000	24700000	29100000	13800000	17100000	19400000	18200000	20900000	1.00:1.23:1.40:1.32:1.51	32347	agmatinase [Caldalkalibacillus thermarum TA2.A1]
197	3320	QZT34776.1	27.52	53	18	18	390000000	429000000	470000000	289000000	292000000	160000000	178000000	221000000	139000000	129000000	1.00:1.11:1.38:0.87:0.81	51407	dipeptidase [Caldalkalibacillus thermarum TA2.A1]
1261	6550	QZT34203.1	27.51	21	3	3	6480000	6550000	15900000	16300000	14500000	6480000	6550000	15900000	16300000	14500000	1.00:1.01:2.46:2.52:2.24	31488	mechanosensitive ion channel family protein [Caldalkalibacillus thermarum TA2.A1]
857	392	QZT34052.1	27.49	29	5	5	10700000	11300000	9440000	8530000	13400000	7450000	8590000	7040000	6640000	10700000	1.00:1.15:0.94:0.89:1.44	27373	ABC transporter ATP-binding protein [Caldalkalibacillus thermarum TA2.A1]
762	532	QZT33347.1	27.48	41	7	7	135000000	136000000	124000000	147000000	113000000	81200000	81700000	77500000	83000000	62000000	1.00:1.01:0.95:1.02:0.76	28273	esterase family protein [Caldalkalibacillus thermarum TA2.A1]
298	415	QZT34645.1	27.43	57	9	9	3300000000	2700000000	1380000000	1790000000	1130000000	2590000000	2110000000	1140000000	1520000000	919000000	1.00:0.82:0.44:0.59:0.35	16275	ferritin-like domain-containing protein [Caldalkalibacillus thermarum TA2.A1]
154	52	QZT32953.1	27.37	76	16	16	542000000	509000000	436000000	479000000	432000000	217000000	210000000	166000000	153000000	163000000	1.00:0.97:0.76:0.70:0.75	31503	2-oxoacid:ferredoxin oxidoreductase subunit beta [Caldalkalibacillus thermarum TA2.A1]
1087	3291	QZT33503.1	27.37	50	4	4	92700000	77900000	56000000	69800000	82400000	92100000	77800000	55700000	68900000	81900000	1.00:0.84:0.61:0.75:0.89	11516	50S ribosomal protein L21 [Caldalkalibacillus thermarum TA2.A1]
246	12817	QZT33817.1	27.32	22	9	9	34100000	26200000	31500000	19900000	48000000	20000000	15000000	17200000	11200000	26300000	1.00:0.75:0.86:0.56:1.31	64927	alpha-glucosidase [Caldalkalibacillus thermarum TA2.A1]
830	651	QZT33284.1	27.28	23	5	5	166000000	191000000	62400000	36800000	49200000	133000000	158000000	50300000	29600000	29400000	1.00:1.18:0.38:0.22:0.22	33064	protease HtpX [Caldalkalibacillus thermarum TA2.A1]
465	275	QZT33638.1	27.23	51	10	10	98000000	88900000	128000000	135000000	96700000	52700000	44800000	64500000	72100000	52200000	1.00:0.85:1.22:1.37:0.99	31772	diaminopimelate epimerase [Caldalkalibacillus thermarum TA2.A1]
1203	2730	QZT33179.1	27.22	55	3	3	6800000	1990000	1500000	4050000	3180000	6800000	1990000	1500000	4050000	3180000	1.00:0.29:0.22:0.60:0.47	7882	YlaI family protein [Caldalkalibacillus thermarum TA2.A1]
1371	232	QZT34440.1	27.19	7	3	3	23200000	29600000	31100000	27100000	23200000	23200000	29600000	31100000	27100000	23200000	1.00:1.28:1.34:1.17:1.00	46677	preprotein translocase subunit SecY [Caldalkalibacillus thermarum TA2.A1]
187	483	QZT34536.1	27.1	43	10	10	125000000	157000000	339000000	383000000	226000000	60800000	81800000	190000000	216000000	125000000	1.00:1.34:3.12:3.55:2.06	45288	glutamate-5-semialdehyde dehydrogenase [Caldalkalibacillus thermarum TA2.A1]
950	2706	QZT33447.1	27.08	11	3	3	4950000	4810000	7260000	5470000	7900000	4950000	4810000	7260000	5470000	7900000	1.00:0.97:1.47:1.11:1.60	43430	pyridoxal phosphate-dependent aminotransferase [Caldalkalibacillus thermarum TA2.A1]
312	423	QZT33081.1	27.03	84	12	12	1460000000	935000000	3510000000	4520000000	6490000000	662000000	479000000	1840000000	2260000000	3320000000	1.00:0.72:2.78:3.41:5.01	20833	peroxiredoxin [Caldalkalibacillus thermarum TA2.A1]
1083	716	QZT35384.1	27.02	28	3	3	11900000	13600000	12900000	14200000	9380000	11900000	13600000	12900000	14200000	9380000	1.00:1.15:1.09:1.19:0.79	17224	transcriptional regulator ArgR [Caldalkalibacillus thermarum TA2.A1]
687	1133	QZT33290.1	27.02	37	3	3	47500000	27700000	9770000	14700000	2610000	43500000	25800000	9060000	13700000	2520000	1.00:0.59:0.21:0.32:0.06	9968	DUF1128 domain-containing protein [Caldalkalibacillus thermarum TA2.A1]
1598	12775	QZT35216.1	26.97	25	3	3	51000000	56200000	40600000	83700000	50900000	42400000	48200000	29400000	67700000	42600000	1.00:1.14:0.69:1.60:1.00	6594	FixH family protein [Caldalkalibacillus thermarum TA2.A1]
49	312	QZT32971.1	26.91	86	22	22	383000000	450000000	616000000	616000000	1050000000	117000000	144000000	224000000	223000000	352000000	1.00:1.23:1.91:1.91:3.01	38244	aspartate-semialdehyde dehydrogenase [Caldalkalibacillus thermarum TA2.A1]
1202	1258	QZT34376.1	26.87	24	2	2	2740000	2300000	3960000	5180000	9410000	2740000	2300000	3960000	5180000	9410000	1.00:0.84:1.45:1.89:3.43	19994	2-amino-4-hydroxy-6-hydroxymethyldihydropteridine diphosphokinase [Caldalkalibacillus thermarum TA2.A1]
422	3110	QZT34617.1	26.86	34	9	9	45900000	44800000	61600000	34200000	32000000	28900000	29500000	40500000	21900000	20100000	1.00:1.02:1.40:0.76:0.70	37548	phosphoribosylformylglycinamidine cyclo-ligase [Caldalkalibacillus thermarum TA2.A1]
346	503	QZT35358.1	26.84	22	7	7	20800000	23600000	30900000	24600000	58000000	13600000	15900000	21000000	17900000	38500000	1.00:1.17:1.55:1.32:2.84	45510	tRNA 4-thiouridine(8) synthase ThiI [Caldalkalibacillus thermarum TA2.A1]
746	401	QZT35104.1	26.8	6	2	2	10300000	10600000	8870000	5870000	4060000	10300000	10600000	8870000	5870000	4060000	1.00:1.03:0.86:0.57:0.39	34747	EcsC family protein [Caldalkalibacillus thermarum TA2.A1]
116	370	QZT34176.1	26.78	62	17	17	376000000	428000000	325000000	323000000	173000000	131000000	138000000	121000000	119000000	71300000	1.00:1.05:0.93:0.91:0.54	40858	acetyl-CoA C-acetyltransferase [Caldalkalibacillus thermarum TA2.A1]
272	121	QZT33862.1	26.66	13	9	9	25200000	18000000	18000000	12400000	23400000	12500000	9310000	7740000	7000000	11900000	1.00:0.74:0.62:0.56:0.95	85712	ribonuclease R [Caldalkalibacillus thermarum TA2.A1]
670	897	QZT33622.1	26.61	48	6	6	11200000	6300000	18800000	29500000	21400000	8640000	4950000	14000000	22900000	16700000	1.00:0.57:1.62:2.65:1.94	27934	enoyl-CoA hydratase [Caldalkalibacillus thermarum TA2.A1]
12	168	QZT33094.1	26.58	58	38	38	287000000	338000000	312000000	314000000	349000000	69000000	80800000	89600000	85400000	109000000	1.00:1.17:1.30:1.24:1.59	107228	isoleucine--tRNA ligase [Caldalkalibacillus thermarum TA2.A1]
198	2335	QZT32964.1	26.38	46	16	16	50100000	52100000	53800000	24400000	73900000	16600000	16800000	17200000	10600000	30900000	1.00:1.01:1.04:0.64:1.86	49550	insulinase family protein [Caldalkalibacillus thermarum TA2.A1]
141	28	QZT33378.1	26.38	66	21	21	1050000000	887000000	684000000	866000000	1350000000	386000000	340000000	259000000	335000000	502000000	1.00:0.88:0.67:0.87:1.30	36056	flotillin-like protein FloA [Caldalkalibacillus thermarum TA2.A1]
145	51	QZT33026.1	26.32	72	16	16	1350000000	1400000000	1160000000	1040000000	1400000000	556000000	583000000	501000000	444000000	654000000	1.00:1.05:0.90:0.80:1.18	28722	GTP-sensing pleiotropic transcriptional regulator CodY [Caldalkalibacillus thermarum TA2.A1]
89	836	QZT32911.1	26.31	74	22	22	221000000	254000000	353000000	319000000	351000000	69000000	78900000	131000000	124000000	141000000	1.00:1.14:1.90:1.80:2.04	42235	MBL fold metallo-hydrolase [Caldalkalibacillus thermarum TA2.A1]
350	3849	QZT34647.1	26.29	36	12	12	59100000	60600000	62800000	76300000	60700000	26200000	26000000	31300000	40000000	32700000	1.00:0.99:1.19:1.53:1.25	56467	NAD(P)H-hydrate dehydratase [Caldalkalibacillus thermarum TA2.A1]
206	324	QZT33867.1	26.26	78	12	12	540000000	431000000	1050000000	904000000	1130000000	277000000	235000000	528000000	452000000	527000000	1.00:0.85:1.91:1.63:1.90	19908	FAD-dependent oxidoreductase [Caldalkalibacillus thermarum TA2.A1]
1048	225	QZT33191.1	26.25	64	5	5	793000000	848000000	392000000	424000000	54700000	596000000	654000000	282000000	333000000	45300000	1.00:1.10:0.47:0.56:0.08	10491	4Fe-4S dicluster domain-containing protein [Caldalkalibacillus thermarum TA2.A1]
295	1118	QZT32500.1	26.22	20	8	8	11300000	12600000	17900000	19400000	21900000	6880000	7520000	11100000	13300000	13600000	1.00:1.09:1.61:1.93:1.98	49251	DUF1446 domain-containing protein [Caldalkalibacillus thermarum TA2.A1]
650	1512	QZT34960.1	26.2	7	2	2	2500000	2310000	1780000	1370000	2440000	2500000	2310000	1780000	1370000	2440000	1.00:0.92:0.71:0.55:0.98	45643	DnaD domain protein [Caldalkalibacillus thermarum TA2.A1]
1003	12753	QZT34543.1	26.2	28	2	2	80700000	66500000	46800000	76000000	10800000	80700000	66500000	46800000	76000000	10800000	1.00:0.82:0.58:0.94:0.13	14111	kinase-associated lipoprotein B [Caldalkalibacillus thermarum TA2.A1]
3	112	QZT33263.1	26.19	54	41	41	413000000	323000000	246000000	339000000	680000000	74200000	56500000	46000000	65100000	132000000	1.00:0.76:0.62:0.88:1.78	130120	pyruvate carboxylase [Caldalkalibacillus thermarum TA2.A1]
910	606	QZT33651.1	26.17	18	3	3	2670000	2280000	3940000	9520000	5860000	2670000	2280000	3940000	9520000	5860000	1.00:0.85:1.47:3.56:2.19	22265	DUF951 domain-containing protein [Caldalkalibacillus thermarum TA2.A1]
690	1441	QZT32808.1	26.15	28	3	3	27700000	26500000	31100000	18700000	12700000	27700000	26500000	31100000	18700000	12700000	1.00:0.96:1.12:0.68:0.46	23765	L-serine ammonia-lyase iron-sulfur-dependent subunit beta [Caldalkalibacillus thermarum TA2.A1]
748	165	QZT33763.1	26.1	13	3	3	4760000	7550000	7450000	4840000	3080000	4760000	7550000	7450000	4840000	3080000	1.00:1.59:1.57:1.02:0.65	37613	methionine ABC transporter ATP-binding protein [Caldalkalibacillus thermarum TA2.A1]
959	3425	QZT34345.1	26.1	36	4	4	66600000	73000000	44400000	54200000	36300000	45600000	51700000	32000000	39000000	26600000	1.00:1.13:0.70:0.85:0.58	10492	septation regulator SpoVG [Caldalkalibacillus thermarum TA2.A1]
983	1113	QZT34303.1	26.08	17	4	4	6950000	6620000	8410000	3960000	13100000	5320000	5580000	5180000	2960000	6310000	1.00:1.05:0.98:0.56:1.19	32545	LysR family transcriptional regulator [Caldalkalibacillus thermarum TA2.A1]
899	6807	QZT32992.1	26.02	17	4	4	7720000	10600000	7060000	7260000	9930000	6960000	9650000	6360000	6850000	8810000	1.00:1.39:0.91:0.98:1.27	29584	isoprenyl transferase [Caldalkalibacillus thermarum TA2.A1]
1593	44687	QZT33339.1	25.93	51	3	3	41400000	15100000	17100000	14400000	22000000	30100000	10000000	10800000	8410000	14200000	1.00:0.33:0.36:0.28:0.47	5943	redoxin domain-containing protein [Caldalkalibacillus thermarum TA2.A1]
240	729	QZT34076.1	25.89	49	15	15	181000000	189000000	147000000	155000000	105000000	72600000	77400000	62000000	68000000	44000000	1.00:1.07:0.85:0.94:0.61	37896	LacI family DNA-binding transcriptional regulator [Caldalkalibacillus thermarum TA2.A1]
922	3305	QZT34995.1	25.89	15	4	4	13300000	5720000	9040000	9680000	12100000	10500000	4510000	7460000	8020000	9790000	1.00:0.43:0.71:0.76:0.93	36880	selenide water dikinase SelD [Caldalkalibacillus thermarum TA2.A1]
608	202	QZT33374.1	25.81	30	6	6	10700000	9980000	8800000	7640000	16300000	8220000	7710000	6730000	6360000	13300000	1.00:0.94:0.82:0.77:1.62	36336	PhoH family protein [Caldalkalibacillus thermarum TA2.A1]
1290	1668	QZT35277.1	25.76	22	2	2	5310000	6200000	10200000	15900000	11600000	5010000	5720000	9200000	14300000	10400000	1.00:1.14:1.84:2.87:2.09	14465	PaaI family thioesterase [Caldalkalibacillus thermarum TA2.A1]
19	283	QZT33841.1	25.72	35	18	18	187000000	180000000	121000000	152000000	81800000	68500000	63300000	48500000	59100000	27100000	1.00:0.92:0.71:0.86:0.40	89132	3-hydroxyacyl-CoA dehydrogenase [Caldalkalibacillus thermarum TA2.A1]
268	49	QZT33402.1	25.69	23	10	10	23100000	30800000	26600000	28500000	32900000	13100000	18800000	15700000	17800000	20200000	1.00:1.43:1.20:1.35:1.54	68968	translation elongation factor 4 [Caldalkalibacillus thermarum TA2.A1]
559	558	QZT32736.1	25.68	95	11	11	46700000	45700000	51300000	67900000	118000000	24300000	23600000	26400000	33000000	57200000	1.00:0.97:1.09:1.36:2.35	14937	methylglyoxal synthase [Caldalkalibacillus thermarum TA2.A1]
266	182	QZT33836.1	25.68	51	15	15	189000000	523000000	761000000	870000000	1610000000	78700000	269000000	404000000	472000000	873000000	1.00:3.42:5.14:6.00:11.10	33681	sirohydrochlorin chelatase [Caldalkalibacillus thermarum TA2.A1]
1307	187	QZT34160.1	25.64	15	3	3	31500000	25900000	18600000	17500000	15900000	31500000	25900000	18600000	17500000	15900000	1.00:0.82:0.59:0.55:0.50	37488	NADH-quinone oxidoreductase subunit NuoH [Caldalkalibacillus thermarum TA2.A1]
355	425	QZT35373.1	25.57	49	8	8	230000000	216000000	260000000	262000000	314000000	156000000	151000000	161000000	167000000	204000000	1.00:0.97:1.03:1.07:1.31	25557	2 3 4 5-tetrahydropyridine-2 6-dicarboxylate N-acetyltransferase [Caldalkalibacillus thermarum TA2.A1]
1304	2544	QZT32734.1	25.43	8	2	2	3170000	3760000	2530000	2320000	6170000	3170000	3760000	2530000	2320000	6170000	1.00:1.19:0.80:0.73:1.94	31540	YitT family protein [Caldalkalibacillus thermarum TA2.A1]
447	171	QZT33732.1	25.39	3	2	2	3680000	2870000	1050000	1750000	1040000	3680000	2870000	1050000	1750000	1040000	1.00:0.78:0.29:0.48:0.28	75630	penicillin-binding transpeptidase domain-containing protein [Caldalkalibacillus thermarum TA2.A1]
1397	1901	QZT32984.1	25.3	47	4	4	26000000	16500000	17300000	29000000	13400000	24800000	15900000	16400000	27300000	12600000	1.00:0.64:0.66:1.10:0.51	10889	YlxR family protein [Caldalkalibacillus thermarum TA2.A1]
1435	892	QZT34445.1	25.28	65	4	4	51300000	43900000	35200000	39300000	50400000	46300000	39500000	29900000	34500000	45400000	1.00:0.85:0.65:0.75:0.98	4306	50S ribosomal protein L36 [Caldalkalibacillus thermarum TA2.A1]
316	731	QZT34322.1	25.22	13	4	4	2460000	1810000	4060000	4740000	6090000	1870000	1460000	3630000	4210000	5270000	1.00:0.78:1.94:2.25:2.82	66315	DNA polymerase III subunit gamma/tau [Caldalkalibacillus thermarum TA2.A1]
241	911	QZT35402.1	25.21	54	18	18	157000000	142000000	107000000	137000000	112000000	73500000	67700000	52400000	69000000	52500000	1.00:0.92:0.71:0.94:0.71	43533	conserved virulence factor C family protein [Caldalkalibacillus thermarum TA2.A1]
457	336	QZT34435.1	25.21	58	10	10	723000000	432000000	455000000	521000000	668000000	430000000	276000000	272000000	297000000	398000000	1.00:0.64:0.63:0.69:0.93	19560	50S ribosomal protein L6 [Caldalkalibacillus thermarum TA2.A1]
722	1331	QZT34255.1	25.17	38	7	7	13800000	13900000	15300000	19300000	15500000	8160000	7840000	9220000	12600000	10500000	1.00:0.96:1.13:1.54:1.28	27162	response regulator transcription factor [Caldalkalibacillus thermarum TA2.A1]
1178	596	QZT35507.1	25.16	19	2	2	8500000	5460000	3010000	3570000	5480000	8500000	5460000	3010000	3570000	5480000	1.00:0.64:0.35:0.42:0.65	11302	YutD family protein [Caldalkalibacillus thermarum TA2.A1]
250	410	QZT34827.1	25.15	34	8	8	9620000	6670000	15300000	18500000	18400000	6670000	4980000	9800000	12200000	11700000	1.00:0.75:1.47:1.83:1.75	52250	NAD-dependent succinate-semialdehyde dehydrogenase [Caldalkalibacillus thermarum TA2.A1]
412	3284	QZT35403.1	25.08	17	7	7	8880000	10600000	11800000	3920000	13500000	6520000	7300000	6540000	2430000	6790000	1.00:1.12:1.00:0.37:1.04	67254	2-succinyl-5-enolpyruvyl-6-hydroxy-3-cyclohexene-1-carboxylic-acid synthase [Caldalkalibacillus thermarum TA2.A1]
882	479	QZT34446.1	25.01	33	5	5	141000000	120000000	58500000	43100000	48700000	131000000	112000000	54500000	40500000	46200000	1.00:0.85:0.41:0.31:0.35	14069	30S ribosomal protein S13 [Caldalkalibacillus thermarum TA2.A1]
9	113	QZT35158.1	25.01	38	35	35	145000000	147000000	156000000	215000000	121000000	41400000	41800000	45600000	70500000	37200000	1.00:1.01:1.10:1.70:0.90	147027	helicase-exonuclease AddAB subunit AddA [Caldalkalibacillus thermarum TA2.A1]
313	348	QZT33601.1	25	86	10	10	5320000000	2360000000	1950000000	3400000000	3760000000	2600000000	1280000000	938000000	1540000000	1750000000	1.00:0.49:0.36:0.59:0.67	11627	thioredoxin [Caldalkalibacillus thermarum TA2.A1]
10	40	QZT32890.1	24.95	57	39	26	529000000	167000000	665000000	805000000	939000000	240000000	82400000	335000000	382000000	488000000	1.00:0.34:1.39:1.59:2.03	82799	catalase/peroxidase HPI [Caldalkalibacillus thermarum TA2.A1]
443	798	QZT34024.1	24.92	43	9	9	164000000	181000000	175000000	142000000	83700000	104000000	117000000	112000000	95600000	53700000	1.00:1.12:1.08:0.92:0.52	31699	DegV family protein [Caldalkalibacillus thermarum TA2.A1]
801	973	QZT35514.1	24.89	29	5	5	16200000	11600000	16000000	14000000	28900000	14400000	10100000	14400000	13000000	25800000	1.00:0.70:1.00:0.91:1.80	27638	LamB/YcsF family protein [Caldalkalibacillus thermarum TA2.A1]
165	190	QZT35420.1	24.81	76	19	19	709000000	800000000	854000000	824000000	546000000	225000000	265000000	292000000	253000000	194000000	1.00:1.18:1.30:1.12:0.86	38094	recombinase RecA [Caldalkalibacillus thermarum TA2.A1]
183	2025	QZT33353.1	24.74	30	11	11	12100000	13800000	10600000	9260000	11600000	6360000	7190000	4780000	5080000	6660000	1.00:1.13:0.75:0.80:1.05	56560	glucose-6-phosphate dehydrogenase [Caldalkalibacillus thermarum TA2.A1]
766	708	QZT34618.1	24.72	36	6	6	54100000	54100000	67300000	49900000	43600000	43800000	45700000	54600000	38000000	31400000	1.00:1.04:1.25:0.87:0.72	23223	phosphoribosylglycinamide formyltransferase [Caldalkalibacillus thermarum TA2.A1]
945	418	QZT34222.1	24.62	11	3	3	18100000	27500000	21300000	10900000	11900000	18100000	27500000	21300000	10900000	11900000	1.00:1.52:1.18:0.60:0.66	49575	N-acetylglucosamine-specific PTS transporter subunit IIBC [Caldalkalibacillus thermarum TA2.A1]
958	212	QZT35194.1	24.48	16	4	4	38700000	44400000	90400000	144000000	82700000	35100000	40100000	83300000	133000000	76600000	1.00:1.14:2.37:3.77:2.18	31673	DUF4352 domain-containing protein [Caldalkalibacillus thermarum TA2.A1]
903	442	QZT34436.1	24.47	47	6	6	148000000	130000000	69400000	58200000	76300000	99400000	92100000	48500000	37700000	54100000	1.00:0.93:0.49:0.38:0.54	13804	50S ribosomal protein L18 [Caldalkalibacillus thermarum TA2.A1]
539	2694	QZT34355.1	24.4	18	5	5	6840000	8210000	15100000	11400000	15400000	6490000	7580000	13500000	10500000	13600000	1.00:1.17:2.07:1.61:2.10	41469	MazG family protein [Caldalkalibacillus thermarum TA2.A1]
134	147	QZT32849.1	24.4	51	16	16	71300000	62200000	110000000	115000000	193000000	32000000	26300000	50000000	51500000	83600000	1.00:0.82:1.56:1.61:2.61	60108	dihydroxy-acid dehydratase [Caldalkalibacillus thermarum TA2.A1]
233	22	QZT35524.1	24.38	64	16	16	144000000	353000000	404000000	445000000	622000000	65400000	138000000	158000000	174000000	232000000	1.00:2.10:2.42:2.65:3.55	28833	precorrin-6A reductase [Caldalkalibacillus thermarum TA2.A1]
182	1751	QZT32965.1	24.33	43	14	14	74500000	79900000	77900000	34500000	112000000	36600000	37200000	35600000	17800000	55300000	1.00:1.02:0.97:0.49:1.51	49717	insulinase family protein [Caldalkalibacillus thermarum TA2.A1]
201	37	QZT34161.1	24.28	58	20	20	596000000	473000000	329000000	363000000	211000000	320000000	257000000	176000000	185000000	114000000	1.00:0.80:0.55:0.58:0.36	41838	NADH-quinone oxidoreductase subunit D [Caldalkalibacillus thermarum TA2.A1]
289	197	QZT34050.1	24.27	79	14	14	129000000	164000000	218000000	208000000	386000000	61900000	78500000	97900000	87200000	162000000	1.00:1.27:1.58:1.41:2.61	27121	phosphocholine cytidylyltransferase family protein [Caldalkalibacillus thermarum TA2.A1]
515	6794	QZT34058.1	24.26	3	2	2	789000	564000	5550000	4880000	1530000	789000	564000	5550000	4880000	1530000	1.00:0.71:7.03:6.19:1.94	80148	S8 family serine peptidase [Caldalkalibacillus thermarum TA2.A1]
818	1983	QZT35444.1	24.24	22	4	4	5220000	2610000	3970000	2750000	8000000	4950000	2530000	3480000	2660000	7750000	1.00:0.51:0.70:0.54:1.57	44638	acetoin utilization protein AcuC [Caldalkalibacillus thermarum TA2.A1]
1308	3289	QZT32557.1	24.17	22	2	2	2310000	3200000	2790000	1810000	3300000	2310000	3200000	2790000	1810000	3300000	1.00:1.39:1.21:0.79:1.43	18629	phospholipid methyltransferase [Caldalkalibacillus thermarum TA2.A1]
429	167	QZT35457.1	24.08	69	13	13	752000000	841000000	889000000	859000000	1080000000	376000000	433000000	460000000	453000000	545000000	1.00:1.15:1.22:1.20:1.45	28607	bifunctional hydroxymethylpyrimidine kinase/phosphomethylpyrimidine kinase [Caldalkalibacillus thermarum TA2.A1]
336	269	QZT32996.1	24	64	12	12	357000000	386000000	337000000	248000000	193000000	152000000	169000000	142000000	105000000	83300000	1.00:1.11:0.94:0.69:0.55	26611	30S ribosomal protein S2 [Caldalkalibacillus thermarum TA2.A1]
1570	6864	QZT32804.1	23.96	13	2	2	6310000	9830000	5860000	4140000	9150000	6310000	9830000	5860000	4140000	9150000	1.00:1.56:0.93:0.66:1.45	23405	ribulose-phosphate 3-epimerase [Caldalkalibacillus thermarum TA2.A1]
193	304	QZT34947.1	23.96	59	25	25	336000000	318000000	391000000	365000000	416000000	109000000	101000000	124000000	117000000	128000000	1.00:0.93:1.14:1.08:1.18	47644	NADP-dependent isocitrate dehydrogenase [Caldalkalibacillus thermarum TA2.A1]
221	745	QZT34938.1	23.96	14	12	12	15000000	12300000	8370000	6330000	8000000	6490000	5350000	3290000	2090000	2640000	1.00:0.83:0.51:0.32:0.41	130856	DNA polymerase III subunit alpha [Caldalkalibacillus thermarum TA2.A1]
188	27	QZT33296.1	23.73	36	11	11	266000000	273000000	201000000	193000000	187000000	154000000	161000000	115000000	119000000	110000000	1.00:1.05:0.75:0.77:0.72	41357	sn-glycerol-3-phosphate ABC transporter ATP-binding protein UgpC [Caldalkalibacillus thermarum TA2.A1]
868	1266	QZT32536.1	23.65	40	6	6	11800000	11000000	12400000	10200000	7300000	9360000	8350000	9190000	7780000	5760000	1.00:0.89:0.98:0.83:0.62	20670	DUF84 family protein [Caldalkalibacillus thermarum TA2.A1]
783	914	QZT34983.1	23.63	19	5	5	5960000	5910000	5240000	6480000	9930000	4110000	4120000	4020000	4880000	6550000	1.00:1.00:0.98:1.19:1.59	38347	LacI family transcriptional regulator [Caldalkalibacillus thermarum TA2.A1]
1236	3348	QZT34578.1	23.6	9	3	3	6370000	4720000	5560000	6020000	4060000	6370000	4720000	5560000	6020000	4060000	1.00:0.74:0.87:0.95:0.64	38063	thiamine-phosphate kinase [Caldalkalibacillus thermarum TA2.A1]
270	545	QZT32595.1	23.59	23	10	10	13100000	17300000	18400000	17200000	21700000	6290000	8150000	9050000	9240000	12800000	1.00:1.30:1.44:1.47:2.03	63899	ABC-ATPase domain-containing protein [Caldalkalibacillus thermarum TA2.A1]
665	551	QZT34871.1	23.58	15	3	3	29000000	17300000	15900000	10100000	10100000	29000000	17300000	15900000	10100000	10100000	1.00:0.60:0.55:0.35:0.35	38990	TRAP transporter substrate-binding protein [Caldalkalibacillus thermarum TA2.A1]
900	316	QZT33688.1	23.5	16	4	4	8830000	6900000	13500000	11200000	14700000	7430000	5340000	11700000	10200000	13700000	1.00:0.72:1.57:1.38:1.84	27559	cytoplasmic protein [Caldalkalibacillus thermarum TA2.A1]
158	195	QZT32790.1	23.44	46	17	17	84600000	84000000	77600000	79000000	156000000	32300000	30600000	30900000	33400000	58700000	1.00:0.95:0.96:1.04:1.82	54279	nicotinate phosphoribosyltransferase [Caldalkalibacillus thermarum TA2.A1]
923	747	QZT33544.1	23.43	29	3	3	18200000	17600000	16100000	24700000	10500000	13400000	12800000	11300000	15700000	7680000	1.00:0.95:0.84:1.17:0.57	22199	XTP/dITP diphosphatase [Caldalkalibacillus thermarum TA2.A1]
861	487	QZT34979.1	23.4	23	3	3	21600000	21000000	14000000	12200000	13600000	19400000	19000000	12500000	9600000	12400000	1.00:0.98:0.64:0.49:0.64	13630	50S ribosomal protein L20 [Caldalkalibacillus thermarum TA2.A1]
604	563	QZT35346.1	23.39	32	5	5	135000000	75300000	55800000	76300000	99400000	122000000	68200000	50500000	68600000	88700000	1.00:0.56:0.41:0.56:0.72	21940	translation initiation factor IF-3 [Caldalkalibacillus thermarum TA2.A1]
1014	613	QZT35470.1	23.39	34	5	5	43900000	36100000	29900000	40500000	55700000	33600000	27100000	23900000	29600000	41400000	1.00:0.81:0.71:0.88:1.23	24146	helix-turn-helix transcriptional regulator [Caldalkalibacillus thermarum TA2.A1]
393	238	QZT34643.1	23.37	40	10	10	188000000	264000000	161000000	136000000	328000000	94300000	133000000	72200000	59900000	140000000	1.00:1.41:0.77:0.64:1.48	37034	aliphatic sulfonate ABC transporter substrate-binding protein [Caldalkalibacillus thermarum TA2.A1]
255	2081	QZT34078.1	23.32	36	14	14	106000000	104000000	110000000	66800000	161000000	53800000	52800000	54800000	33800000	79800000	1.00:0.98:1.02:0.63:1.48	56956	glycoside hydrolase family 32 protein [Caldalkalibacillus thermarum TA2.A1]
329	76	QZT35443.1	23.31	41	9	9	308000000	360000000	199000000	255000000	63100000	187000000	208000000	110000000	137000000	37700000	1.00:1.11:0.59:0.73:0.20	27685	Crp/Fnr family transcriptional regulator [Caldalkalibacillus thermarum TA2.A1]
79	148	QZT35389.1	23.27	57	18	18	270000000	326000000	178000000	129000000	179000000	122000000	152000000	90100000	67900000	85600000	1.00:1.24:0.74:0.56:0.70	49477	aminomethyl-transferring glycine dehydrogenase subunit GcvPA [Caldalkalibacillus thermarum TA2.A1]
341	862	QZT35467.1	23.27	58	11	11	125000000	111000000	156000000	231000000	146000000	55500000	58900000	79600000	113000000	70500000	1.00:1.06:1.43:2.04:1.27	35803	zinc-binding dehydrogenase [Caldalkalibacillus thermarum TA2.A1]
192	347	QZT35477.1	23.23	60	16	16	103000000	126000000	209000000	213000000	324000000	42200000	50200000	73100000	72600000	120000000	1.00:1.19:1.73:1.72:2.83	42046	tRNA 2-thiouridine(34) synthase MnmA [Caldalkalibacillus thermarum TA2.A1]
1089	34276	QZT35377.1	23.18	14	2	2	1310000	3100000	4210000	5210000	4360000	1310000	3100000	4210000	5210000	4360000	1.00:2.37:3.22:3.98:3.33	23674	CoA pyrophosphatase [Caldalkalibacillus thermarum TA2.A1]
196	276	QZT32751.1	23.1	54	18	18	116000000	122000000	130000000	97500000	208000000	49400000	54600000	45900000	36000000	69400000	1.00:1.11:0.93:0.73:1.41	49741	asparagine--tRNA ligase [Caldalkalibacillus thermarum TA2.A1]
630	82	QZT34535.1	23.04	12	4	4	2480000	3670000	5120000	7500000	3960000	1880000	2700000	4590000	6570000	3490000	1.00:1.44:2.44:3.49:1.86	39933	glutamate 5-kinase [Caldalkalibacillus thermarum TA2.A1]
118	368	QZT33335.1	23.03	79	13	13	2400000000	1300000000	3220000000	3080000000	2150000000	1210000000	686000000	1920000000	1920000000	1320000000	1.00:0.57:1.58:1.59:1.09	22976	superoxide dismutase [Caldalkalibacillus thermarum TA2.A1]
844	1872	QZT33697.1	23.01	31	3	3	20200000	16400000	8020000	8430000	4020000	20200000	16400000	8020000	8430000	4020000	1.00:0.81:0.40:0.42:0.20	17636	hypothetical protein HUR95_15970 [Caldalkalibacillus thermarum TA2.A1]
1146	924	QZT34865.1	22.97	6	2	2	3070000	2790000	2390000	1670000	5250000	3070000	2790000	2390000	1670000	5250000	1.00:0.91:0.78:0.54:1.71	50448	ABC transporter permease [Caldalkalibacillus thermarum TA2.A1]
1438	6795	QZT34883.1	22.81	45	2	2	9080000	6150000	2840000	4340000	2150000	9080000	6150000	2840000	4340000	2150000	1.00:0.68:0.31:0.48:0.24	9520	MoaD/ThiS family protein [Caldalkalibacillus thermarum TA2.A1]
435	1942	QZT32813.1	22.8	61	9	9	148000000	166000000	157000000	165000000	134000000	100000000	116000000	106000000	109000000	86700000	1.00:1.16:1.05:1.09:0.86	33852	ACP S-malonyltransferase [Caldalkalibacillus thermarum TA2.A1]
113	3285	QZT33532.1	22.79	71	21	21	571000000	610000000	475000000	333000000	467000000	255000000	266000000	209000000	164000000	199000000	1.00:1.04:0.82:0.64:0.78	36872	porphobilinogen synthase [Caldalkalibacillus thermarum TA2.A1]
731	2580	QZT34691.1	22.75	27	5	5	26500000	22900000	22500000	31100000	27900000	22200000	20200000	18200000	26900000	24400000	1.00:0.91:0.82:1.21:1.10	21013	DUF402 domain-containing protein [Caldalkalibacillus thermarum TA2.A1]
750	97	QZT34250.1	22.72	15	5	5	36100000	86500000	100000000	86100000	39100000	34600000	83600000	97500000	84600000	38200000	1.00:2.42:2.82:2.45:1.10	44375	trypsin-like peptidase domain-containing protein [Caldalkalibacillus thermarum TA2.A1]
558	3578	QZT33922.1	22.63	19	6	6	4590000	9480000	10800000	18300000	72400000	3780000	7620000	8700000	16600000	68200000	1.00:2.02:2.30:4.39:18.07	43230	sulfate adenylyltransferase [Caldalkalibacillus thermarum TA2.A1]
1413	787	QZT34444.1	22.59	56	3	3	154000000	102000000	70600000	113000000	95000000	113000000	74700000	54900000	88300000	74600000	1.00:0.66:0.48:0.78:0.66	8311	translation initiation factor IF-1 [Caldalkalibacillus thermarum TA2.A1]
579	9750	QZT32716.1	22.54	22	5	5	6790000	8730000	11400000	8280000	25200000	5660000	7520000	9740000	6800000	20800000	1.00:1.33:1.72:1.20:3.68	40727	3-dehydroquinate synthase [Caldalkalibacillus thermarum TA2.A1]
170	400	QZT33848.1	22.53	68	20	20	390000000	510000000	368000000	266000000	304000000	165000000	219000000	162000000	102000000	126000000	1.00:1.33:0.98:0.62:0.77	35622	ferrochelatase [Caldalkalibacillus thermarum TA2.A1]
46	224	QZT34612.1	22.44	81	35	35	2380000000	2650000000	2310000000	1570000000	1660000000	578000000	615000000	550000000	346000000	386000000	1.00:1.07:0.95:0.60:0.67	49795	adenylosuccinate lyase [Caldalkalibacillus thermarum TA2.A1]
877	176	QZT34408.1	22.41	38	4	4	207000000	149000000	174000000	178000000	229000000	204000000	147000000	171000000	175000000	225000000	1.00:0.72:0.84:0.86:1.10	15077	50S ribosomal protein L11 [Caldalkalibacillus thermarum TA2.A1]
90	44	QZT32659.1	22.37	39	20	20	137000000	151000000	136000000	154000000	134000000	38000000	44000000	45400000	51500000	45100000	1.00:1.16:1.20:1.36:1.19	69787	1-deoxy-D-xylulose-5-phosphate synthase [Caldalkalibacillus thermarum TA2.A1]
1017	1835	QZT33553.1	22.35	7	2	2	618000	210000	1020000	1040000	1130000	618000	210000	1020000	1040000	1130000	1.00:0.34:1.66:1.69:1.82	35343	quinone oxidoreductase [Caldalkalibacillus thermarum TA2.A1]
785	2189	QZT35254.1	22.34	11	3	3	7560000	9810000	12600000	14200000	6190000	7560000	9810000	12600000	14200000	6190000	1.00:1.30:1.67:1.88:0.82	44408	aminotransferase class I/II-fold pyridoxal phosphate-dependent enzyme [Caldalkalibacillus thermarum TA2.A1]
150	30	QZT32617.1	22.33	54	18	18	499000000	597000000	404000000	443000000	251000000	224000000	261000000	189000000	230000000	125000000	1.00:1.16:0.84:1.02:0.56	46962	Glu/Leu/Phe/Val dehydrogenase [Caldalkalibacillus thermarum TA2.A1]
1268	28271	QZT34195.1	22.32	27	3	3	3530000	3870000	6530000	6680000	3050000	3530000	3870000	6530000	6680000	3050000	1.00:1.10:1.85:1.89:0.87	14079	response regulator [Caldalkalibacillus thermarum TA2.A1]
414	145	QZT33620.1	22.31	52	10	3	23300000	16500000	24500000	33700000	24700000	23300000	16500000	24500000	33700000	24700000	1.00:0.71:1.05:1.45:1.06	34405	electron transfer flavoprotein subunit alpha/FixB family protein [Caldalkalibacillus thermarum TA2.A1]
423	1025	QZT32587.1	22.29	30	9	9	27800000	25700000	28900000	22700000	76000000	13100000	12600000	13500000	11000000	34300000	1.00:0.97:1.03:0.84:2.63	51636	L-seryl-tRNA(Sec) selenium transferase [Caldalkalibacillus thermarum TA2.A1]
921	1943	QZT32661.1	22.27	12	4	4	15000000	12900000	10900000	12400000	11500000	13300000	11700000	9360000	11300000	10400000	1.00:0.88:0.71:0.85:0.78	32218	NAD(+)/NADH kinase [Caldalkalibacillus thermarum TA2.A1]
1382	696	QZT32482.1	22.25	18	3	3	73700000	188000000	121000000	102000000	103000000	71100000	182000000	117000000	99500000	100000000	1.00:2.56:1.65:1.40:1.41	14732	DoxX family protein [Caldalkalibacillus thermarum TA2.A1]
506	2310	QZT33126.1	22.23	9	3	3	12800000	9320000	5050000	8940000	2720000	12800000	9320000	5050000	8940000	2720000	1.00:0.73:0.40:0.70:0.21	56485	acyl-CoA carboxylase subunit beta [Caldalkalibacillus thermarum TA2.A1]
805	19130	QZT32577.1	22.21	12	4	4	6640000	5020000	7260000	9820000	6990000	5520000	4100000	6190000	8570000	6160000	1.00:0.74:1.12:1.55:1.12	42692	N-acetyldiaminopimelate deacetylase [Caldalkalibacillus thermarum TA2.A1]
879	889	QZT33278.1	22.14	57	5	5	57300000	31200000	16600000	33200000	37000000	44200000	23200000	12600000	25200000	28000000	1.00:0.52:0.29:0.57:0.63	12495	hypothetical protein HUR95_13430 [Caldalkalibacillus thermarum TA2.A1]
688	2030	QZT34761.1	22.05	23	4	4	6440000	9650000	13200000	9550000	10500000	6170000	9430000	12500000	8710000	8780000	1.00:1.53:2.02:1.41:1.42	27604	3-oxoacyl-ACP reductase [Caldalkalibacillus thermarum TA2.A1]
943	1871	QZT35276.1	22.05	20	4	4	8220000	7400000	7170000	6870000	10200000	7420000	6810000	6450000	6540000	9670000	1.00:0.92:0.87:0.88:1.30	34588	phenylacetic acid degradation operon negative regulatory protein PaaX [Caldalkalibacillus thermarum TA2.A1]
349	556	QZT33185.1	22.05	68	12	12	182000000	211000000	198000000	310000000	168000000	100000000	117000000	112000000	167000000	87000000	1.00:1.17:1.12:1.67:0.87	23712	DUF1054 domain-containing protein [Caldalkalibacillus thermarum TA2.A1]
1025	660	QZT33189.1	22.01	36	5	5	64300000	60800000	50400000	72500000	78300000	47400000	44800000	37600000	53100000	53700000	1.00:0.95:0.79:1.12:1.13	18314	DUF1885 family protein [Caldalkalibacillus thermarum TA2.A1]
497	1172	QZT32934.1	21.98	60	11	11	255000000	239000000	158000000	290000000	349000000	150000000	151000000	71800000	127000000	148000000	1.00:1.00:0.48:0.84:0.98	16205	BrxA/BrxB family bacilliredoxin [Caldalkalibacillus thermarum TA2.A1]
494	6548	QZT32800.1	21.96	57	11	11	29400000	34800000	52500000	52200000	70200000	14700000	16600000	22900000	22800000	30200000	1.00:1.13:1.56:1.56:2.06	34703	methionyl-tRNA formyltransferase [Caldalkalibacillus thermarum TA2.A1]
804	808	QZT34431.1	21.95	58	5	5	147000000	98100000	81200000	90900000	109000000	116000000	78500000	63600000	70600000	86200000	1.00:0.67:0.55:0.61:0.74	11425	50S ribosomal protein L24 [Caldalkalibacillus thermarum TA2.A1]
1235	1656	QZT35300.1	21.81	49	2	2	25900000	20500000	35600000	38100000	23000000	25700000	20400000	35300000	37700000	22900000	1.00:0.79:1.38:1.47:0.89	7170	gamma-type small acid-soluble spore protein [Caldalkalibacillus thermarum TA2.A1]
876	12842	QZT34614.1	21.7	44	4	4	81800000	74200000	52100000	50500000	41700000	75100000	67900000	47500000	45700000	37500000	1.00:0.90:0.63:0.61:0.50	10017	phosphoribosylformylglycinamidine synthase subunit PurS [Caldalkalibacillus thermarum TA2.A1]
58	579	QZT34307.1	21.69	37	23	23	110000000	111000000	142000000	111000000	195000000	47700000	44700000	58200000	52100000	70500000	1.00:0.94:1.22:1.09:1.48	92798	DNA gyrase subunit A [Caldalkalibacillus thermarum TA2.A1]
582	231	QZT35441.1	21.68	49	10	10	51200000	61500000	64700000	58600000	102000000	36000000	44000000	42500000	40700000	70800000	1.00:1.22:1.18:1.13:1.97	29754	inositol monophosphatase family protein [Caldalkalibacillus thermarum TA2.A1]
238	383	QZT35380.1	21.66	63	9	9	233000000	201000000	230000000	362000000	366000000	180000000	166000000	180000000	290000000	288000000	1.00:0.92:1.00:1.61:1.59	21063	elongation factor P [Caldalkalibacillus thermarum TA2.A1]
547	446	QZT32741.1	21.64	32	7	7	77800000	71100000	63600000	53800000	49500000	55000000	53400000	42100000	37500000	34000000	1.00:0.97:0.77:0.68:0.62	32937	pantoate--beta-alanine ligase [Caldalkalibacillus thermarum TA2.A1]
1651	12820	QZT34357.1	21.59	27	2	2	9150000	8000000	15500000	20200000	26400000	9150000	8000000	15500000	20200000	26400000	1.00:0.87:1.69:2.20:2.89	10569	RNA-binding S4 domain-containing protein [Caldalkalibacillus thermarum TA2.A1]
947	3459	QZT34582.1	21.56	8	2	2	5680000	4330000	4200000	4900000	2520000	5680000	4330000	4200000	4900000	2520000	1.00:0.76:0.74:0.86:0.44	37794	tRNA (adenosine(37)-N6)-threonylcarbamoyltransferase complex transferase subunit TsaD [Caldalkalibacillus thermarum TA2.A1]
1209	28232	QZT33739.1	21.55	69	5	5	24500000	22100000	11600000	16900000	7910000	19000000	17600000	9150000	12300000	6450000	1.00:0.92:0.48:0.65:0.34	10262	DUF3055 domain-containing protein [Caldalkalibacillus thermarum TA2.A1]
225	831	QZT34192.1	21.5	50	15	15	249000000	236000000	234000000	184000000	185000000	85900000	91800000	89800000	69700000	71800000	1.00:1.07:1.05:0.81:0.84	35145	class II fructose-bisphosphatase [Caldalkalibacillus thermarum TA2.A1]
717	207	QZT33398.1	21.49	17	3	3	3270000	2650000	2790000	3250000	5810000	3270000	2650000	2790000	3250000	5810000	1.00:0.81:0.85:1.00:1.78	42077	molecular chaperone DnaJ [Caldalkalibacillus thermarum TA2.A1]
128	1657	QZT34600.1	21.47	58	24	24	128000000	147000000	143000000	137000000	197000000	39000000	44200000	39600000	47200000	60800000	1.00:1.13:1.02:1.21:1.56	57509	glutamine-hydrolyzing GMP synthase [Caldalkalibacillus thermarum TA2.A1]
468	1609	QZT35270.1	21.41	5	2	2	819000	1600000	5240000	3900000	4080000	819000	1600000	5240000	3900000	4080000	1.00:1.95:6.39:4.77:4.98	36959	tRNA dihydrouridine synthase DusB [Caldalkalibacillus thermarum TA2.A1]
36	249	QZT33080.1	21.4	42	16	16	193000000	106000000	363000000	618000000	547000000	84100000	46900000	154000000	278000000	229000000	1.00:0.56:1.83:3.31:2.72	55566	alkyl hydroperoxide reductase subunit F [Caldalkalibacillus thermarum TA2.A1]
561	2328	QZT33456.1	21.39	72	10	10	255000000	219000000	233000000	349000000	449000000	183000000	155000000	169000000	241000000	308000000	1.00:0.85:0.92:1.32:1.68	17490	transcription elongation factor GreA [Caldalkalibacillus thermarum TA2.A1]
779	522	QZT34334.1	21.35	17	3	3	7970000	8300000	10500000	8900000	6560000	7970000	8300000	10500000	8900000	6560000	1.00:1.04:1.32:1.12:0.82	28249	tRNA1(Val) (adenine(37)-N6)-methyltransferase [Caldalkalibacillus thermarum TA2.A1]
1181	2612	QZT32981.1	21.23	27	4	4	202000000	115000000	58500000	94800000	71500000	200000000	114000000	57900000	94100000	71000000	1.00:0.57:0.29:0.47:0.35	13687	30S ribosome-binding factor RbfA [Caldalkalibacillus thermarum TA2.A1]
673	817	QZT32980.1	21.19	24	3	3	5820000	4930000	4530000	3340000	3170000	5820000	4930000	4530000	3340000	3170000	1.00:0.85:0.78:0.57:0.54	35972	bifunctional oligoribonuclease/PAP phosphatase NrnA [Caldalkalibacillus thermarum TA2.A1]
798	9681	QZT33446.1	21.19	47	6	5	8800000	10100000	9440000	11700000	11000000	5370000	8400000	8100000	10200000	8870000	1.00:1.57:1.51:1.90:1.65	29561	carbon-nitrogen family hydrolase [Caldalkalibacillus thermarum TA2.A1]
331	133	QZT34784.1	21.19	31	11	11	26000000	29700000	38000000	27500000	40200000	15500000	18200000	24200000	18000000	25900000	1.00:1.17:1.56:1.16:1.67	59414	Na/Pi cotransporter family protein [Caldalkalibacillus thermarum TA2.A1]
362	277	QZT33317.1	21.16	40	10	10	222000000	239000000	199000000	102000000	88800000	137000000	149000000	129000000	68900000	62400000	1.00:1.09:0.94:0.50:0.46	44540	molybdopterin molybdotransferase MoeA [Caldalkalibacillus thermarum TA2.A1]
242	333	QZT35002.1	21.13	32	11	11	24200000	24900000	29800000	25600000	30200000	8110000	9430000	15100000	13900000	14700000	1.00:1.16:1.86:1.71:1.82	59092	phosphoenolpyruvate carboxykinase (ATP) [Caldalkalibacillus thermarum TA2.A1]
666	6865	QZT34523.1	21.12	20	4	4	3760000	5080000	6620000	12900000	8230000	3640000	4940000	6440000	12300000	7750000	1.00:1.36:1.77:3.37:2.13	27844	MOSC domain-containing protein [Caldalkalibacillus thermarum TA2.A1]
1230	829	QZT32822.1	21.06	40	3	3	154000000	107000000	60000000	56900000	44300000	124000000	88700000	48800000	44800000	36400000	1.00:0.72:0.39:0.36:0.29	10138	30S ribosomal protein S16 [Caldalkalibacillus thermarum TA2.A1]
174	301	QZT34302.1	21.03	41	21	21	64100000	77500000	103000000	68900000	157000000	26100000	32600000	40900000	36300000	60700000	1.00:1.25:1.57:1.39:2.33	71925	DNA topoisomerase (ATP-hydrolyzing) subunit B [Caldalkalibacillus thermarum TA2.A1]
1123	2458	QZT35342.1	21	9	2	2	2330000	1610000	1250000	1570000	3600000	2330000	1610000	1250000	1570000	3600000	1.00:0.69:0.54:0.67:1.54	23321	dephospho-CoA kinase [Caldalkalibacillus thermarum TA2.A1]
14	68	QZT33886.1	20.93	85	29	29	4900000000	6450000000	7440000000	4600000000	4560000000	1690000000	2210000000	2440000000	1450000000	1520000000	1.00:1.31:1.45:0.86:0.90	36287	ArsJ-associated glyceraldehyde-3-phosphate dehydrogenase [Caldalkalibacillus thermarum TA2.A1]
426	3787	QZT33164.1	20.87	56	6	6	79600000	74000000	70000000	64400000	119000000	56800000	48300000	37800000	41100000	89400000	1.00:0.85:0.67:0.72:1.57	29645	purine-nucleoside phosphorylase [Caldalkalibacillus thermarum TA2.A1]
308	653	QZT33012.1	20.87	11	3	3	7060000	8170000	5940000	2870000	7970000	5170000	7120000	4520000	2600000	6290000	1.00:1.38:0.87:0.50:1.22	42605	flagellar motor switch phosphatase FliY [Caldalkalibacillus thermarum TA2.A1]
620	222	QZT34165.1	20.87	72	9	9	158000000	146000000	172000000	140000000	138000000	127000000	115000000	115000000	95900000	90800000	1.00:0.90:0.90:0.75:0.71	14956	F0F1 ATP synthase subunit epsilon [Caldalkalibacillus thermarum TA2.A1]
1320	3885	QZT34438.1	20.87	56	5	5	103000000	70600000	60600000	76800000	72200000	84000000	54800000	49600000	65000000	62300000	1.00:0.65:0.59:0.77:0.74	7067	50S ribosomal protein L30 [Caldalkalibacillus thermarum TA2.A1]
1145	756	QZT34156.1	20.76	2	2	2	15300000	15000000	10400000	10400000	10600000	15300000	15000000	10400000	10400000	10600000	1.00:0.98:0.68:0.68:0.69	68245	NADH-quinone oxidoreductase subunit L [Caldalkalibacillus thermarum TA2.A1]
433	1188	QZT33468.1	20.72	27	9	9	72000000	85300000	94100000	99200000	97400000	42900000	49600000	55500000	58100000	58600000	1.00:1.16:1.29:1.36:1.37	41312	cysteine desulfurase [Caldalkalibacillus thermarum TA2.A1]
599	656	QZT34739.1	20.67	18	4	4	5870000	10100000	15700000	14500000	28400000	5390000	9330000	13200000	11600000	24400000	1.00:1.73:2.44:2.14:4.52	28854	CRISPR-associated endoribonuclease Cas6 [Caldalkalibacillus thermarum TA2.A1]
1313	698	QZT35155.1	20.51	12	2	2	3330000	3930000	2330000	2390000	4920000	3330000	3930000	2330000	2390000	4920000	1.00:1.18:0.70:0.72:1.48	25168	zinc metallopeptidase [Caldalkalibacillus thermarum TA2.A1]
667	825	QZT32760.1	20.5	25	4	4	10800000	8080000	5260000	6300000	4510000	9920000	7500000	4880000	5660000	4110000	1.00:0.76:0.49:0.57:0.41	22242	methyltransferase domain-containing protein [Caldalkalibacillus thermarum TA2.A1]
82	1978	QZT34310.1	20.47	50	19	19	152000000	228000000	286000000	258000000	311000000	68200000	92800000	109000000	94900000	115000000	1.00:1.36:1.61:1.39:1.69	52817	IMP dehydrogenase [Caldalkalibacillus thermarum TA2.A1]
772	670	QZT34392.1	20.45	17	5	5	14000000	13700000	15400000	9810000	17100000	12500000	12300000	14000000	8910000	15400000	1.00:0.98:1.12:0.71:1.23	40377	DNA integrity scanning diadenylate cyclase DisA [Caldalkalibacillus thermarum TA2.A1]
1084	782	QZT33891.1	20.44	30	4	3	15000000	11700000	4750000	4020000	6320000	15000000	11700000	4750000	4020000	6320000	1.00:0.78:0.32:0.27:0.42	21700	ATP-dependent Clp endopeptidase proteolytic subunit ClpP [Caldalkalibacillus thermarum TA2.A1]
995	1597	QZT33161.1	20.43	21	2	2	8220000	5760000	5080000	9870000	8280000	8220000	5760000	5080000	9870000	8280000	1.00:0.70:0.62:1.20:1.01	13175	anti-sigma F factor antagonist [Caldalkalibacillus thermarum TA2.A1]
1174	667	QZT33461.1	20.38	29	4	4	25300000	12900000	7560000	15500000	16500000	24100000	12300000	7210000	14400000	15400000	1.00:0.51:0.30:0.60:0.64	15595	Holliday junction resolvase RuvX [Caldalkalibacillus thermarum TA2.A1]
817	1791	QZT33310.1	20.36	42	5	5	59600000	52700000	50900000	35500000	60500000	56600000	50300000	49000000	34100000	58200000	1.00:0.89:0.87:0.60:1.03	18135	molybdenum cofactor biosynthesis protein MoaE [Caldalkalibacillus thermarum TA2.A1]
421	385	QZT34314.1	20.33	68	11	11	579000000	573000000	598000000	830000000	366000000	269000000	272000000	319000000	433000000	201000000	1.00:1.01:1.18:1.61:0.75	22036	pyridoxal 5'-phosphate synthase glutaminase subunit PdxT [Caldalkalibacillus thermarum TA2.A1]
893	2279	QZT34247.1	20.32	8	2	2	483000	447000	378000	588000	663000	483000	447000	378000	588000	663000	1.00:0.92:0.78:1.22:1.37	47783	PucR family transcriptional regulator [Caldalkalibacillus thermarum TA2.A1]
986	6696	QZT32740.1	20.28	24	4	4	14200000	11600000	7830000	8060000	5150000	12900000	10800000	7040000	7520000	4810000	1.00:0.84:0.55:0.58:0.37	30405	3-methyl-2-oxobutanoate hydroxymethyltransferase [Caldalkalibacillus thermarum TA2.A1]
802	832	QZT32986.1	20.2	63	6	6	16200000	19600000	17200000	21000000	19300000	12200000	14200000	14400000	17800000	15300000	1.00:1.17:1.18:1.46:1.26	17563	ribosome maturation factor RimP [Caldalkalibacillus thermarum TA2.A1]
835	306	QZT33150.1	20.19	83	10	10	191000000	213000000	113000000	146000000	139000000	117000000	134000000	60700000	77400000	81100000	1.00:1.14:0.52:0.66:0.69	16821	6 7-dimethyl-8-ribityllumazine synthase [Caldalkalibacillus thermarum TA2.A1]
216	926	QZT34695.1	20.16	76	13	13	261000000	257000000	323000000	221000000	172000000	109000000	109000000	132000000	101000000	78300000	1.00:1.00:1.22:0.93:0.72	26254	SDR family oxidoreductase [Caldalkalibacillus thermarum TA2.A1]
1324	55338	QZT33502.1	20.12	43	3	3	6750000	7200000	4830000	7820000	8810000	6750000	7200000	4830000	7820000	8810000	1.00:1.07:0.72:1.16:1.31	12571	ribosomal-processing cysteine protease Prp [Caldalkalibacillus thermarum TA2.A1]
550	3365	QZT33919.1	20.05	24	4	4	7410000	9980000	12100000	6890000	18100000	6260000	8760000	9850000	5520000	14600000	1.00:1.40:1.57:0.88:2.33	38793	anthranilate phosphoribosyltransferase [Caldalkalibacillus thermarum TA2.A1]
340	154	QZT34347.1	20.03	41	11	11	133000000	143000000	221000000	205000000	215000000	55300000	58700000	95300000	98100000	95300000	1.00:1.06:1.72:1.77:1.72	34454	ribose-phosphate diphosphokinase [Caldalkalibacillus thermarum TA2.A1]
500	188	QZT33267.1	20.01	58	9	9	143000000	139000000	117000000	135000000	162000000	97800000	93700000	78700000	90100000	116000000	1.00:0.96:0.80:0.92:1.19	15290	hypothetical protein HUR95_13355 [Caldalkalibacillus thermarum TA2.A1]
1168	752	QZT33137.1	20.01	23	2	2	1420000	1090000	932000	809000	1330000	1420000	1090000	932000	809000	1330000	1.00:0.76:0.65:0.57:0.93	18158	pantetheine-phosphate adenylyltransferase [Caldalkalibacillus thermarum TA2.A1]
1115	1687	QZT34301.1	19.92	7	2	2	238000	348000	532000	282000	377000	238000	348000	532000	282000	377000	1.00:1.47:2.24:1.19:1.58	43155	DNA replication/repair protein RecF [Caldalkalibacillus thermarum TA2.A1]
326	509	QZT34682.1	19.83	58	13	13	79300000	70600000	94500000	75400000	133000000	39100000	34100000	41400000	31900000	55300000	1.00:0.87:1.06:0.82:1.41	36871	D-glycerate dehydrogenase [Caldalkalibacillus thermarum TA2.A1]
1157	12750	QZT35479.1	19.81	24	2	2	33700000	50400000	31100000	24400000	13500000	27500000	42700000	25500000	20000000	11000000	1.00:1.55:0.93:0.73:0.40	10215	preprotein translocase subunit YajC [Caldalkalibacillus thermarum TA2.A1]
223	1605	QZT32745.1	19.76	63	16	16	126000000	131000000	112000000	108000000	182000000	46600000	47300000	37600000	34100000	55500000	1.00:1.02:0.81:0.73:1.19	48126	amidohydrolase [Caldalkalibacillus thermarum TA2.A1]
28	6	QZT33595.1	19.72	67	34	34	550000000	629000000	877000000	591000000	1050000000	141000000	155000000	219000000	148000000	262000000	1.00:1.10:1.56:1.05:1.86	66200	succinate dehydrogenase flavoprotein subunit [Caldalkalibacillus thermarum TA2.A1]
202	90	QZT32581.1	19.68	58	19	19	287000000	272000000	254000000	234000000	323000000	117000000	115000000	98700000	89200000	119000000	1.00:0.98:0.84:0.76:1.01	49689	UDP-N-acetylmuramoyl-tripeptide--D-alanyl-D-alanine ligase [Caldalkalibacillus thermarum TA2.A1]
347	282	QZT34335.1	19.67	32	7	7	25200000	25400000	26000000	26400000	14500000	17300000	17500000	19700000	20600000	11200000	1.00:1.01:1.14:1.19:0.65	34513	16S rRNA (cytidine(1402)-2'-O)-methyltransferase [Caldalkalibacillus thermarum TA2.A1]
1021	439	QZT33142.1	19.66	10	2	2	76200000	88600000	68500000	52500000	65200000	72200000	83200000	65900000	51000000	62300000	1.00:1.15:0.91:0.71:0.86	45910	cytochrome c biogenesis protein CcsA [Caldalkalibacillus thermarum TA2.A1]
1434	445	QZT32921.1	19.5	13	2	2	20300000	22800000	16100000	13300000	22500000	20300000	22800000	16100000	13300000	22500000	1.00:1.12:0.79:0.65:1.11	23862	GerMN domain-containing protein [Caldalkalibacillus thermarum TA2.A1]
654	157	QZT33515.1	19.48	10	4	4	6440000	15400000	11500000	5310000	24700000	5810000	14800000	10600000	5240000	23500000	1.00:2.55:1.83:0.90:4.05	57507	SPOR domain-containing protein [Caldalkalibacillus thermarum TA2.A1]
789	12751	QZT32782.1	19.48	22	4	4	3080000	22200000	17600000	10300000	21800000	2720000	19900000	16500000	9680000	19300000	1.00:7.32:6.08:3.56:7.11	25433	orotidine-5'-phosphate decarboxylase [Caldalkalibacillus thermarum TA2.A1]
57	1708	QZT34073.1	19.41	69	26	26	184000000	247000000	358000000	419000000	295000000	47500000	65900000	97600000	106000000	74100000	1.00:1.39:2.06:2.22:1.56	58899	gamma-glutamyltransferase family protein [Caldalkalibacillus thermarum TA2.A1]
715	502	QZT33796.1	19.35	51	11	11	38100000	34400000	62100000	45400000	54200000	23800000	20500000	39500000	31600000	39700000	1.00:0.86:1.65:1.33:1.67	22502	cob(I)yrinic acid a c-diamide adenosyltransferase [Caldalkalibacillus thermarum TA2.A1]
144	2500	QZT34874.1	19.27	34	10	10	33300000	29200000	29200000	19500000	20000000	20600000	17400000	17700000	12700000	12000000	1.00:0.85:0.86:0.62:0.58	52109	aldehyde dehydrogenase family protein [Caldalkalibacillus thermarum TA2.A1]
72	127	QZT33812.1	19.26	75	25	24	244000000	355000000	407000000	414000000	276000000	82500000	124000000	135000000	132000000	84300000	1.00:1.50:1.64:1.60:1.02	50980	tryptophanase [Caldalkalibacillus thermarum TA2.A1]
612	3427	QZT33322.1	19.26	16	4	4	6540000	6590000	3880000	4200000	5560000	5510000	5480000	2770000	3250000	3910000	1.00:0.99:0.50:0.59:0.71	36655	ThiF family adenylyltransferase [Caldalkalibacillus thermarum TA2.A1]
863	2259	QZT34714.1	19.23	43	5	5	47400000	29500000	18900000	38100000	17500000	42200000	26300000	17000000	32900000	15200000	1.00:0.62:0.40:0.78:0.36	16155	ribonuclease HI [Caldalkalibacillus thermarum TA2.A1]
69	88	QZT32816.1	19.22	68	18	18	123000000	133000000	157000000	155000000	168000000	53600000	61300000	73500000	72800000	79600000	1.00:1.14:1.37:1.36:1.48	44268	beta-ketoacyl-ACP synthase II [Caldalkalibacillus thermarum TA2.A1]
917	1690	QZT35198.1	19.22	45	5	5	11100000	6830000	2520000	4520000	3830000	8120000	5000000	1880000	3510000	3060000	1.00:0.62:0.23:0.43:0.38	19500	BREX-3 system P-loop-containing protein BrxF [Caldalkalibacillus thermarum TA2.A1]
615	2224	QZT35003.1	19.18	61	7	7	54600000	39500000	44800000	43300000	48200000	40300000	29200000	32700000	32400000	36300000	1.00:0.73:0.81:0.80:0.90	19539	gamma carbonic anhydrase family protein [Caldalkalibacillus thermarum TA2.A1]
878	191	QZT34396.1	19.13	50	7	7	24600000	21800000	44500000	31100000	18800000	18400000	16600000	32900000	20400000	13600000	1.00:0.90:1.79:1.11:0.74	25357	2-C-methyl-D-erythritol 4-phosphate cytidylyltransferase [Caldalkalibacillus thermarum TA2.A1]
740	6570	QZT34580.1	19.13	17	4	4	6970000	5510000	6210000	8570000	6110000	6020000	4660000	5790000	7940000	5820000	1.00:0.77:0.96:1.32:0.97	26044	tRNA (adenosine(37)-N6)-threonylcarbamoyltransferase complex dimerization subunit type 1 TsaB [Caldalkalibacillus thermarum TA2.A1]
702	3858	QZT35455.1	19.11	24	3	3	41200000	18900000	13100000	18900000	11400000	38000000	17600000	12000000	17400000	10700000	1.00:0.46:0.32:0.46:0.28	14788	hypothetical protein HUR95_13380 [Caldalkalibacillus thermarum TA2.A1]
632	1788	QZT32623.1	19.1	42	6	6	26300000	23000000	15500000	19100000	19600000	19400000	17100000	12600000	13600000	13900000	1.00:0.88:0.65:0.70:0.72	24420	(d)CMP kinase [Caldalkalibacillus thermarum TA2.A1]
191	1196	QZT33116.1	18.92	58	23	23	113000000	131000000	118000000	92900000	220000000	40200000	46600000	38000000	30700000	66200000	1.00:1.16:0.94:0.76:1.65	56094	UDP-N-acetylmuramoyl-L-alanyl-D-glutamate--2 6-diaminopimelate ligase [Caldalkalibacillus thermarum TA2.A1]
998	31225	QZT33154.1	18.89	37	4	4	26500000	27800000	17000000	58200000	25500000	23400000	25200000	14000000	52700000	21900000	1.00:1.08:0.60:2.25:0.94	16155	peptidylprolyl isomerase [Caldalkalibacillus thermarum TA2.A1]
675	1239	QZT33519.1	18.88	24	6	6	4980000	9150000	13600000	4600000	13400000	3780000	6690000	11000000	3360000	9560000	1.00:1.77:2.90:0.89:2.53	44749	type II secretion system F family protein [Caldalkalibacillus thermarum TA2.A1]
631	780	QZT34200.1	18.82	41	6	6	41900000	33200000	28700000	46200000	21100000	32500000	25800000	22800000	36700000	16200000	1.00:0.79:0.70:1.13:0.50	31780	3-hydroxybutyryl-CoA dehydrogenase [Caldalkalibacillus thermarum TA2.A1]
1373	3300	QZT32916.1	18.82	48	4	3	9260000	6830000	4950000	5730000	3100000	9260000	6830000	4950000	5730000	3100000	1.00:0.74:0.53:0.62:0.33	10024	metal-sensitive transcriptional regulator [Caldalkalibacillus thermarum TA2.A1]
210	135	QZT33207.1	18.79	65	17	17	834000000	865000000	753000000	391000000	299000000	236000000	264000000	240000000	121000000	98900000	1.00:1.12:1.02:0.51:0.42	37511	2-oxoacid:acceptor oxidoreductase family protein [Caldalkalibacillus thermarum TA2.A1]
262	3500	QZT33311.1	18.75	62	17	17	165000000	150000000	132000000	111000000	167000000	52800000	46200000	48400000	44900000	65300000	1.00:0.88:0.92:0.85:1.24	45690	molybdopterin molybdotransferase MoeA [Caldalkalibacillus thermarum TA2.A1]
108	309	QZT34948.1	18.55	70	14	14	542000000	484000000	647000000	663000000	758000000	321000000	295000000	339000000	321000000	382000000	1.00:0.92:1.06:1.00:1.19	33667	malate dehydrogenase [Caldalkalibacillus thermarum TA2.A1]
956	19129	QZT32737.1	18.54	7	2	2	1720000	1020000	1280000	1020000	3590000	1720000	1020000	1280000	1020000	3590000	1.00:0.59:0.74:0.59:2.08	42926	N-acetyl-alpha-D-glucosaminyl L-malate synthase BshA [Caldalkalibacillus thermarum TA2.A1]
692	887	QZT32713.1	18.54	58	7	7	483000000	653000000	446000000	407000000	458000000	350000000	463000000	321000000	295000000	316000000	1.00:1.32:0.92:0.84:0.90	16944	nucleoside-diphosphate kinase [Caldalkalibacillus thermarum TA2.A1]
74	380	QZT32995.1	18.5	57	19	19	1080000000	1240000000	1010000000	823000000	1010000000	518000000	611000000	462000000	386000000	436000000	1.00:1.18:0.89:0.74:0.84	33306	translation elongation factor Ts [Caldalkalibacillus thermarum TA2.A1]
638	12833	QZT33488.1	18.46	28	6	6	6370000	8750000	12200000	13000000	13000000	5050000	6410000	8620000	8840000	8140000	1.00:1.27:1.70:1.75:1.61	38363	tRNA preQ1(34) S-adenosylmethionine ribosyltransferase-isomerase QueA [Caldalkalibacillus thermarum TA2.A1]
568	921	QZT34366.1	18.45	73	10	10	56100000	52300000	66700000	46100000	87000000	31600000	33000000	40000000	28000000	47600000	1.00:1.04:1.26:0.89:1.50	20589	hypoxanthine phosphoribosyltransferase [Caldalkalibacillus thermarum TA2.A1]
424	1386	QZT34801.1	18.33	45	11	11	20300000	20800000	22300000	15900000	29300000	9330000	9120000	10300000	7180000	13200000	1.00:0.98:1.11:0.77:1.42	43071	aminotransferase A [Caldalkalibacillus thermarum TA2.A1]
514	128	QZT32974.1	18.31	11	2	2	1170000	3610000	6000000	3820000	4170000	1170000	3610000	6000000	3820000	4170000	1.00:3.08:5.12:3.26:3.56	47687	insulinase family protein [Caldalkalibacillus thermarum TA2.A1]
273	465	QZT33599.1	18.3	50	16	15	185000000	225000000	270000000	292000000	370000000	120000000	136000000	163000000	175000000	205000000	1.00:1.14:1.36:1.46:1.71	44571	aspartate kinase [Caldalkalibacillus thermarum TA2.A1]
395	664	QZT35127.1	18.26	80	12	12	566000000	500000000	652000000	745000000	744000000	236000000	211000000	316000000	378000000	352000000	1.00:0.90:1.34:1.61:1.50	20216	YjcG family protein [Caldalkalibacillus thermarum TA2.A1]
944	6580	QZT32704.1	18.25	17	2	2	4070000	4570000	2110000	1320000	1560000	4070000	4570000	2110000	1320000	1560000	1.00:1.12:0.52:0.33:0.38	28164	hypothetical protein HUR95_09930 [Caldalkalibacillus thermarum TA2.A1]
13	43	QZT34770.1	18.21	71	33	33	3070000000	3320000000	3660000000	3160000000	2370000000	772000000	825000000	958000000	796000000	572000000	1.00:1.07:1.24:1.03:0.74	53823	NADP-dependent isocitrate dehydrogenase [Caldalkalibacillus thermarum TA2.A1]
454	690	QZT33621.1	18.21	56	9	2	14500000	7630000	14800000	21400000	4490000	14500000	7630000	14800000	21400000	4490000	1.00:0.53:1.02:1.47:0.31	28101	electron transfer flavoprotein subunit beta/FixA family protein [Caldalkalibacillus thermarum TA2.A1]
279	2551	QZT32933.1	18.19	57	8	8	654000000	430000000	378000000	578000000	323000000	486000000	325000000	293000000	450000000	254000000	1.00:0.67:0.60:0.92:0.52	19773	YwhD family protein [Caldalkalibacillus thermarum TA2.A1]
167	1393	QZT32662.1	18.17	34	15	15	49900000	48600000	41100000	40400000	35200000	18900000	18600000	14100000	14000000	13400000	1.00:0.99:0.75:0.74:0.71	66004	DNA repair protein RecN [Caldalkalibacillus thermarum TA2.A1]
982	6677	QZT34930.1	18.13	6	2	2	904000	761000	869000	218000	1260000	904000	761000	869000	218000	1260000	1.00:0.84:0.96:0.24:1.39	53596	sensor domain-containing diguanylate cyclase [Caldalkalibacillus thermarum TA2.A1]
437	2421	QZT34540.1	18.01	10	4	4	6570000	3350000	3430000	7120000	3350000	5110000	2530000	3130000	6090000	3100000	1.00:0.50:0.61:1.19:0.61	59962	acyl--CoA ligase [Caldalkalibacillus thermarum TA2.A1]
363	15	QZT34863.1	18	9	3	3	14000000	22900000	22100000	19500000	2510000	14000000	22900000	22100000	19500000	2510000	1.00:1.64:1.58:1.39:0.18	38302	dipeptide ABC transporter ATP-binding protein [Caldalkalibacillus thermarum TA2.A1]
1007	3162	QZT33297.1	17.94	8	2	2	1800000	1180000	830000	1280000	1220000	1800000	1180000	830000	1280000	1220000	1.00:0.65:0.46:0.71:0.68	39449	helix-turn-helix domain-containing protein [Caldalkalibacillus thermarum TA2.A1]
136	252	QZT33033.1	17.91	64	20	20	1050000000	859000000	649000000	626000000	774000000	350000000	272000000	219000000	236000000	302000000	1.00:0.78:0.63:0.68:0.86	41632	ADP-forming succinate--CoA ligase subunit beta [Caldalkalibacillus thermarum TA2.A1]
866	22085	QZT35463.1	17.91	50	7	6	46300000	31000000	30700000	69700000	45300000	34700000	20000000	19200000	39100000	28900000	1.00:0.58:0.55:1.13:0.83	17248	arsenate reductase (thioredoxin) [Caldalkalibacillus thermarum TA2.A1]
1171	1111	QZT33167.1	17.89	7	2	2	626000	1180000	829000	611000	908000	626000	1180000	829000	611000	908000	1.00:1.88:1.32:0.97:1.45	33871	site-specific tyrosine recombinase XerD [Caldalkalibacillus thermarum TA2.A1]
1092	1329	QZT34606.1	17.8	32	3	3	1130000	1370000	3120000	3280000	2230000	1130000	1370000	3120000	3280000	2230000	1.00:1.22:2.76:2.91:1.97	25964	uracil-DNA glycosylase [Caldalkalibacillus thermarum TA2.A1]
1029	2170	QZT34541.1	17.77	26	2	2	1040000	1670000	3660000	3270000	1580000	1040000	1670000	3660000	3270000	1580000	1.00:1.60:3.52:3.14:1.52	17087	MarR family transcriptional regulator [Caldalkalibacillus thermarum TA2.A1]
1266	720	QZT32955.1	17.77	71	4	4	444000000	318000000	250000000	465000000	399000000	388000000	280000000	223000000	414000000	349000000	1.00:0.72:0.57:1.07:0.90	8824	stage V sporulation protein SpoVS [Caldalkalibacillus thermarum TA2.A1]
1154	2751	QZT32823.1	17.72	55	3	3	43800000	30200000	17100000	37600000	22200000	43800000	30200000	17100000	37600000	22200000	1.00:0.69:0.39:0.86:0.51	8308	KH domain-containing protein [Caldalkalibacillus thermarum TA2.A1]
909	1223	QZT35352.1	17.71	19	4	4	8350000	6810000	6240000	4350000	8680000	7550000	6040000	5820000	3910000	8050000	1.00:0.80:0.77:0.52:1.07	33540	MoxR family ATPase [Caldalkalibacillus thermarum TA2.A1]
199	866	QZT34611.1	17.67	64	17	17	181000000	240000000	233000000	141000000	94000000	73400000	101000000	108000000	63500000	38200000	1.00:1.38:1.47:0.87:0.52	43294	5-(carboxyamino)imidazole ribonucleotide synthase [Caldalkalibacillus thermarum TA2.A1]
1180	329	QZT33685.1	17.55	40	5	5	16500000	28700000	36000000	30900000	31400000	14600000	24900000	29300000	22900000	22800000	1.00:1.71:2.01:1.57:1.56	16289	IS200/IS605 family transposase [Caldalkalibacillus thermarum TA2.A1]
1180	330	QZT33654.1	17.55	40	5	5	16500000	28700000	36000000	30900000	31400000	14600000	24900000	29300000	22900000	22800000	1.00:1.71:2.01:1.57:1.56	16289	IS200/IS605 family transposase [Caldalkalibacillus thermarum TA2.A1]
66	47	QZT34197.1	17.52	9	8	8	13300000	6890000	5700000	11500000	5810000	7530000	4210000	3210000	6650000	3410000	1.00:0.56:0.43:0.88:0.45	128325	cobalamin-dependent protein [Caldalkalibacillus thermarum TA2.A1]
1244	6561	QZT33237.1	17.5	12	2	2	3300000	2140000	3760000	2930000	4370000	3300000	2140000	3760000	2930000	4370000	1.00:0.65:1.14:0.89:1.32	37885	hypothetical protein HUR95_13190 [Caldalkalibacillus thermarum TA2.A1]
1244	22162	QZT35133.1	17.5	14	2	2	3300000	2140000	3760000	2930000	4370000	3300000	2140000	3760000	2930000	4370000	1.00:0.65:1.14:0.89:1.32	34303	hypothetical protein HUR95_07920 [Caldalkalibacillus thermarum TA2.A1]
271	73	QZT33808.1	17.39	37	7	7	67000000	76000000	58400000	36200000	8560000	42100000	40700000	37000000	25300000	6520000	1.00:0.97:0.88:0.60:0.15	35301	proline dehydrogenase [Caldalkalibacillus thermarum TA2.A1]
575	349	QZT33533.1	17.38	51	11	11	33600000	40100000	63800000	43600000	74700000	19700000	23100000	37000000	25400000	40000000	1.00:1.17:1.88:1.29:2.03	29927	uroporphyrinogen-III synthase [Caldalkalibacillus thermarum TA2.A1]
904	883	QZT34333.1	17.38	31	3	3	26100000	26800000	25600000	33900000	8590000	26100000	26800000	25600000	33900000	8590000	1.00:1.03:0.98:1.30:0.33	14790	DNA replication initiation control protein YabA [Caldalkalibacillus thermarum TA2.A1]
668	297	QZT34825.1	17.38	11	2	2	792000	625000	1510000	772000	576000	792000	625000	1510000	772000	576000	1.00:0.79:1.91:0.97:0.73	36133	ATP-binding cassette domain-containing protein [Caldalkalibacillus thermarum TA2.A1]
711	1201	QZT33536.1	17.33	10	3	3	1940000	1920000	3060000	4030000	3350000	1740000	1600000	2230000	3920000	2950000	1.00:0.92:1.29:2.25:1.70	51781	glutamyl-tRNA reductase [Caldalkalibacillus thermarum TA2.A1]
76	62	QZT33542.1	17.24	58	24	24	1230000000	1420000000	1480000000	1140000000	1690000000	466000000	545000000	550000000	456000000	637000000	1.00:1.17:1.18:0.98:1.37	49503	trigger factor [Caldalkalibacillus thermarum TA2.A1]
431	9	QZT34684.1	17.24	33	10	10	37600000	33500000	51700000	44800000	55200000	21000000	17600000	29300000	26800000	28600000	1.00:0.84:1.39:1.28:1.36	53320	iron-sulfur cluster-binding protein [Caldalkalibacillus thermarum TA2.A1]
327	311	QZT35250.1	17.21	32	7	7	22100000	13900000	20900000	31700000	14300000	12300000	8100000	9550000	15500000	7340000	1.00:0.66:0.78:1.26:0.60	42040	acyl-CoA dehydrogenase [Caldalkalibacillus thermarum TA2.A1]
709	531	QZT35251.1	17.16	8	2	2	2340000	2090000	3490000	2640000	1900000	2340000	2090000	3490000	2640000	1900000	1.00:0.89:1.49:1.13:0.81	41460	acyl-CoA dehydrogenase [Caldalkalibacillus thermarum TA2.A1]
105	1151	QZT34638.1	17.13	31	19	19	31400000	34100000	31100000	31000000	42000000	9470000	11400000	9880000	10800000	13600000	1.00:1.20:1.04:1.14:1.44	84525	DNA helicase PcrA [Caldalkalibacillus thermarum TA2.A1]
59	48	QZT33344.1	17.12	51	20	20	1540000000	1640000000	1480000000	1680000000	1760000000	453000000	493000000	497000000	545000000	594000000	1.00:1.09:1.10:1.20:1.31	47755	2-oxo acid dehydrogenase subunit E2 [Caldalkalibacillus thermarum TA2.A1]
459	3329	QZT32775.1	17.08	57	11	11	123000000	335000000	283000000	389000000	350000000	102000000	274000000	232000000	320000000	294000000	1.00:2.69:2.28:3.14:2.89	20267	bifunctional pyr operon transcriptional regulator/uracil phosphoribosyltransferase PyrR [Caldalkalibacillus thermarum TA2.A1]
676	6584	QZT34510.1	17.03	53	5	4	48900000	18400000	20300000	41200000	15700000	44100000	17000000	18700000	36100000	14300000	1.00:0.39:0.42:0.82:0.32	15830	arsenate reductase (thioredoxin) [Caldalkalibacillus thermarum TA2.A1]
220	272	QZT33512.1	17.02	61	18	18	190000000	206000000	223000000	227000000	241000000	55600000	59100000	85200000	82300000	87200000	1.00:1.06:1.53:1.48:1.57	35703	rod shape-determining protein [Caldalkalibacillus thermarum TA2.A1]
1422	3314	QZT34330.1	16.99	17	2	2	9030000	12700000	11800000	11100000	8030000	9030000	12700000	11800000	11100000	8030000	1.00:1.41:1.31:1.23:0.89	11782	cyclic-di-AMP receptor [Caldalkalibacillus thermarum TA2.A1]
38	16	QZT34367.1	16.95	44	25	25	290000000	276000000	287000000	228000000	328000000	93800000	86200000	90800000	66700000	103000000	1.00:0.92:0.97:0.71:1.10	75574	ATP-dependent zinc metalloprotease FtsH [Caldalkalibacillus thermarum TA2.A1]
244	450	QZT33266.1	16.83	22	9	8	10200000	7430000	12500000	18700000	18800000	6140000	3970000	6450000	10200000	10700000	1.00:0.65:1.05:1.66:1.75	66175	acetate--CoA ligase [Caldalkalibacillus thermarum TA2.A1]
754	1270	QZT32486.1	16.83	18	4	4	5710000	7240000	11100000	9710000	11800000	5230000	6580000	9970000	9030000	10800000	1.00:1.26:1.91:1.73:2.07	41142	M20 peptidase aminoacylase family protein [Caldalkalibacillus thermarum TA2.A1]
207	1662	QZT34237.1	16.79	18	10	10	23900000	25900000	26000000	24400000	18400000	10800000	11600000	12000000	12100000	8830000	1.00:1.07:1.11:1.12:0.82	74313	N-6 DNA methylase [Caldalkalibacillus thermarum TA2.A1]
647	568	QZT32809.1	16.77	3	2	2	2500000	2290000	1950000	679000	1280000	2500000	2290000	1950000	679000	1280000	1.00:0.92:0.78:0.27:0.51	79002	ATP-dependent DNA helicase RecG [Caldalkalibacillus thermarum TA2.A1]
811	3798	QZT34891.1	16.75	19	4	4	2790000	2430000	4630000	5390000	2100000	2690000	2370000	3970000	4470000	1730000	1.00:0.88:1.47:1.66:0.64	42946	iron-containing alcohol dehydrogenase [Caldalkalibacillus thermarum TA2.A1]
248	1029	QZT32865.1	16.71	75	17	17	237000000	209000000	192000000	167000000	387000000	120000000	109000000	91900000	77100000	162000000	1.00:0.90:0.76:0.64:1.35	28231	(S)-benzoin forming benzil reductase [Caldalkalibacillus thermarum TA2.A1]
477	265	QZT34765.1	16.69	50	10	10	22000000	22600000	31300000	43900000	17900000	11400000	12000000	17900000	26100000	10700000	1.00:1.05:1.57:2.29:0.94	36488	MBL fold metallo-hydrolase [Caldalkalibacillus thermarum TA2.A1]
461	3304	QZT34912.1	16.65	56	13	13	81200000	70100000	48400000	69900000	59500000	34900000	30400000	22600000	35200000	30500000	1.00:0.87:0.65:1.01:0.88	27998	SDR family oxidoreductase [Caldalkalibacillus thermarum TA2.A1]
1090	37719	QZT33460.1	16.64	40	2	2	74700000	80000000	53200000	78300000	88200000	74700000	80000000	53200000	78300000	88200000	1.00:1.07:0.71:1.05:1.18	12801	DUF1292 domain-containing protein [Caldalkalibacillus thermarum TA2.A1]
1065	6766	QZT32654.1	16.61	10	2	2	1130000	1150000	1450000	1190000	2620000	1130000	1150000	1450000	1190000	2620000	1.00:1.01:1.28:1.05:2.31	36136	O-sialoglycoprotein endopeptidase [Caldalkalibacillus thermarum TA2.A1]
348	257	QZT33594.1	16.6	73	16	16	196000000	201000000	330000000	218000000	255000000	89700000	87100000	151000000	97400000	108000000	1.00:0.97:1.69:1.09:1.20	27863	succinate dehydrogenase iron-sulfur subunit [Caldalkalibacillus thermarum TA2.A1]
736	724	QZT35176.1	16.56	40	7	7	48600000	25100000	26400000	56500000	38800000	36400000	19300000	21200000	45400000	29100000	1.00:0.53:0.58:1.25:0.80	18301	glutathione peroxidase [Caldalkalibacillus thermarum TA2.A1]
243	422	QZT32735.1	16.54	77	13	13	231000000	258000000	235000000	165000000	245000000	128000000	144000000	131000000	88200000	133000000	1.00:1.12:1.02:0.69:1.04	29258	4-hydroxy-tetrahydrodipicolinate reductase [Caldalkalibacillus thermarum TA2.A1]
1045	638	QZT35048.1	16.52	11	3	2	4640000	2900000	1270000	2010000	2500000	4640000	2900000	1270000	2010000	2500000	1.00:0.63:0.27:0.43:0.54	57560	multicopper oxidase family protein [Caldalkalibacillus thermarum TA2.A1]
741	3816	QZT34668.1	16.5	25	3	3	3330000	3080000	9350000	6370000	4390000	3330000	3080000	9350000	6370000	4390000	1.00:0.92:2.81:1.91:1.32	23716	histidine phosphatase family protein [Caldalkalibacillus thermarum TA2.A1]
274	3387	QZT34828.1	16.49	61	14	14	146000000	158000000	191000000	131000000	127000000	73000000	80000000	92900000	61200000	60300000	1.00:1.10:1.27:0.84:0.83	31635	NAD(P)-dependent oxidoreductase [Caldalkalibacillus thermarum TA2.A1]
954	751	QZT32979.1	16.45	18	4	4	1960000	2160000	2850000	2510000	4120000	1900000	2050000	2770000	2470000	4020000	1.00:1.08:1.46:1.30:2.12	33831	tRNA pseudouridine(55) synthase TruB [Caldalkalibacillus thermarum TA2.A1]
1096	953	QZT34422.1	16.41	25	4	4	93900000	73000000	44800000	38200000	47400000	83900000	64100000	40700000	35100000	43700000	1.00:0.76:0.48:0.42:0.52	11259	50S ribosomal protein L23 [Caldalkalibacillus thermarum TA2.A1]
400	3318	QZT35337.1	16.41	66	9	9	1120000000	1060000000	1170000000	1230000000	840000000	618000000	621000000	648000000	656000000	472000000	1.00:1.01:1.05:1.06:0.76	24884	metal-dependent hydrolase [Caldalkalibacillus thermarum TA2.A1]
1074	34168	QZT34415.1	16.35	57	3	3	178000000	95000000	68400000	103000000	87400000	172000000	92800000	67700000	102000000	86600000	1.00:0.54:0.39:0.59:0.50	8940	50S ribosomal protein L7ae-like protein [Caldalkalibacillus thermarum TA2.A1]
816	1048	QZT33089.1	16.33	12	2	2	4810000	3300000	2080000	3560000	3770000	4810000	3300000	2080000	3560000	3770000	1.00:0.68:0.43:0.74:0.78	33229	MurR/RpiR family transcriptional regulator [Caldalkalibacillus thermarum TA2.A1]
482	1744	QZT34288.1	16.3	42	9	9	82200000	83900000	42700000	37300000	36400000	54300000	53600000	31400000	25700000	26500000	1.00:0.99:0.58:0.47:0.49	31923	nucleoid occlusion protein [Caldalkalibacillus thermarum TA2.A1]
285	109	QZT33258.1	16.29	71	16	16	530000000	490000000	359000000	423000000	526000000	283000000	278000000	198000000	231000000	291000000	1.00:0.98:0.70:0.82:1.03	28028	SDR family oxidoreductase [Caldalkalibacillus thermarum TA2.A1]
205	375	QZT35059.1	16.16	70	21	21	298000000	277000000	228000000	250000000	428000000	113000000	113000000	88800000	98600000	165000000	1.00:1.00:0.79:0.87:1.46	37842	catabolite control protein A [Caldalkalibacillus thermarum TA2.A1]
88	12	QZT32982.1	16.09	28	17	17	225000000	223000000	154000000	173000000	189000000	85900000	81900000	53600000	66300000	67500000	1.00:0.95:0.62:0.77:0.79	83140	translation initiation factor IF-2 [Caldalkalibacillus thermarum TA2.A1]
213	1538	QZT35262.1	16.06	60	13	13	52900000	54400000	68100000	46400000	45600000	21200000	22800000	26600000	19200000	14900000	1.00:1.08:1.26:0.90:0.70	42191	aminotransferase class V-fold PLP-dependent enzyme [Caldalkalibacillus thermarum TA2.A1]
684	1135	QZT33178.1	16	59	6	6	192000000	222000000	200000000	192000000	163000000	146000000	172000000	155000000	156000000	134000000	1.00:1.18:1.06:1.07:0.92	16530	pyridoxamine 5'-phosphate oxidase family protein [Caldalkalibacillus thermarum TA2.A1]
640	1117	QZT33197.1	15.98	36	6	6	57400000	72400000	82200000	84300000	93400000	47000000	59500000	66700000	68000000	76100000	1.00:1.27:1.42:1.45:1.62	24744	N-acetyltransferase [Caldalkalibacillus thermarum TA2.A1]
34	185	QZT34619.1	15.97	73	25	25	481000000	470000000	546000000	322000000	357000000	154000000	149000000	160000000	87500000	111000000	1.00:0.97:1.04:0.57:0.72	56258	bifunctional phosphoribosylaminoimidazolecarboxamide formyltransferase/IMP cyclohydrolase [Caldalkalibacillus thermarum TA2.A1]
1763	4005	QZT33687.1	15.96	19	2	2	47000000	28000000	27000000	38300000	51900000	47000000	28000000	27000000	38300000	51900000	1.00:0.60:0.57:0.81:1.10	11038	DUF4241 domain-containing protein [Caldalkalibacillus thermarum TA2.A1]
847	60414	QZT32799.1	15.95	38	3	3	16900000	7730000	9410000	17800000	21100000	16900000	7730000	9410000	17800000	21100000	1.00:0.46:0.56:1.06:1.25	17717	peptide deformylase [Caldalkalibacillus thermarum TA2.A1]
938	847	QZT32783.1	15.93	22	3	3	2270000	13900000	6570000	7550000	14600000	2270000	13900000	6570000	7550000	14600000	1.00:6.12:2.89:3.33:6.43	22749	orotate phosphoribosyltransferase [Caldalkalibacillus thermarum TA2.A1]
1299	853	QZT34264.1	15.93	40	4	4	43800000	33300000	18600000	15100000	19400000	37700000	28500000	16700000	13400000	17600000	1.00:0.76:0.44:0.36:0.47	8918	30S ribosomal protein S18 [Caldalkalibacillus thermarum TA2.A1]
1418	6654	QZT33482.1	15.92	27	2	2	1780000	2080000	613000	2430000	2160000	1780000	2080000	613000	2430000	2160000	1.00:1.17:0.34:1.37:1.22	9914	post-transcriptional regulator [Caldalkalibacillus thermarum TA2.A1]
409	1757	QZT33395.1	15.92	22	7	7	7190000	8010000	6400000	14200000	18300000	5420000	6450000	5370000	12100000	15700000	1.00:1.19:0.99:2.24:2.90	50839	tRNA (N(6)-L-threonylcarbamoyladenosine(37)-C(2))-methylthiotransferase MtaB [Caldalkalibacillus thermarum TA2.A1]
842	754	QZT32641.1	15.87	52	4	4	17500000	12300000	7160000	10400000	5620000	16900000	11900000	7070000	10200000	5540000	1.00:0.70:0.42:0.60:0.33	16545	type II 3-dehydroquinate dehydratase [Caldalkalibacillus thermarum TA2.A1]
883	718	QZT32958.1	15.85	12	3	3	4050000	4230000	3740000	3220000	2190000	4050000	4230000	3740000	3220000	2190000	1.00:1.04:0.92:0.79:0.54	45647	competence/damage-inducible protein A [Caldalkalibacillus thermarum TA2.A1]
837	2765	QZT33394.1	15.82	42	5	5	35700000	33000000	13500000	19500000	11600000	24500000	24400000	9290000	13500000	8010000	1.00:1.00:0.38:0.55:0.33	16878	NUDIX hydrolase [Caldalkalibacillus thermarum TA2.A1]
1006	2357	QZT32850.1	15.79	16	3	3	18400000	20600000	25100000	13000000	36300000	18400000	20600000	25100000	13000000	36300000	1.00:1.12:1.36:0.70:1.97	33926	LysR family transcriptional regulator [Caldalkalibacillus thermarum TA2.A1]
1264	9753	QZT32742.1	15.71	37	3	3	13800000	13200000	9880000	8630000	16600000	13800000	13200000	9880000	8630000	16600000	1.00:0.96:0.72:0.63:1.20	13933	aspartate 1-decarboxylase [Caldalkalibacillus thermarum TA2.A1]
532	318	QZT33112.1	15.68	19	4	4	5750000	8790000	8570000	5100000	14700000	5260000	7540000	7660000	4770000	13700000	1.00:1.43:1.46:0.91:2.61	40683	undecaprenyldiphospho-muramoylpentapeptide beta-N-acetylglucosaminyltransferase [Caldalkalibacillus thermarum TA2.A1]
1241	382	QZT33914.1	15.63	9	4	4	19400000	15400000	9370000	14300000	9760000	19000000	14900000	9130000	13900000	9510000	1.00:0.79:0.48:0.73:0.50	58821	hypothetical protein HUR95_00235 [Caldalkalibacillus thermarum TA2.A1]
912	700	QZT34554.1	15.59	65	5	5	20500000	17000000	19700000	52900000	50200000	16100000	12400000	17500000	47300000	43400000	1.00:0.77:1.09:2.94:2.70	12906	type II toxin-antitoxin system PemK/MazF family toxin [Caldalkalibacillus thermarum TA2.A1]
971	2449	QZT35440.1	15.54	18	3	3	4750000	6050000	6160000	6220000	7180000	4750000	6050000	6160000	6220000	7180000	1.00:1.28:1.30:1.31:1.51	20954	NUDIX hydrolase [Caldalkalibacillus thermarum TA2.A1]
371	498	QZT32950.1	15.52	58	13	13	68900000	83300000	74100000	73700000	79400000	26800000	30800000	34600000	30700000	32600000	1.00:1.15:1.29:1.15:1.21	42831	glycine C-acetyltransferase [Caldalkalibacillus thermarum TA2.A1]
153	688	QZT34179.1	15.52	66	24	24	535000000	620000000	868000000	731000000	641000000	218000000	262000000	390000000	292000000	245000000	1.00:1.20:1.79:1.34:1.12	45553	serine hydroxymethyltransferase [Caldalkalibacillus thermarum TA2.A1]
662	2014	QZT34641.1	15.51	25	4	4	13200000	17400000	9500000	6940000	21100000	11800000	15600000	8960000	6670000	19700000	1.00:1.32:0.76:0.56:1.66	31197	ABC transporter ATP-binding protein [Caldalkalibacillus thermarum TA2.A1]
813	1415	QZT33819.1	15.51	21	5	5	2040000	2990000	3620000	5730000	3920000	1480000	2010000	3190000	4850000	3440000	1.00:1.36:2.16:3.28:2.33	43048	8-amino-7-oxononanoate synthase [Caldalkalibacillus thermarum TA2.A1]
32	1583	QZT33882.1	15.5	85	26	26	1560000000	2310000000	2280000000	1200000000	1250000000	392000000	644000000	689000000	310000000	331000000	1.00:1.64:1.76:0.79:0.84	46184	phosphopyruvate hydratase [Caldalkalibacillus thermarum TA2.A1]
840	3911	QZT32932.1	15.49	48	5	5	111000000	75800000	42800000	79900000	60700000	105000000	70200000	40700000	75000000	58100000	1.00:0.67:0.39:0.72:0.56	12382	iron-sulfur cluster insertion protein ErpA [Caldalkalibacillus thermarum TA2.A1]
275	2210	QZT33166.1	15.47	48	13	13	130000000	140000000	130000000	113000000	172000000	57500000	63100000	64300000	54000000	72300000	1.00:1.10:1.12:0.94:1.26	44718	phosphopentomutase [Caldalkalibacillus thermarum TA2.A1]
531	6765	QZT32633.1	15.4	28	7	7	13900000	16100000	10800000	9500000	24300000	9720000	11100000	7810000	6530000	16400000	1.00:1.14:0.80:0.67:1.68	37930	NAD(P)H-dependent glycerol-3-phosphate dehydrogenase [Caldalkalibacillus thermarum TA2.A1]
605	468	QZT33600.1	15.38	9	3	3	1460000	2390000	2660000	3200000	2720000	1460000	2390000	2660000	3200000	2720000	1.00:1.63:1.82:2.19:1.86	69321	excinuclease ABC subunit UvrC [Caldalkalibacillus thermarum TA2.A1]
1156	1506	QZT33198.1	15.28	36	3	3	9700000	8400000	10000000	7660000	7840000	9700000	8400000	10000000	7660000	7840000	1.00:0.87:1.03:0.79:0.81	19503	Crp/Fnr family transcriptional regulator [Caldalkalibacillus thermarum TA2.A1]
1212	37727	QZT33728.1	15.26	55	4	4	5470000	5460000	7660000	5520000	13100000	4900000	4960000	7190000	5280000	12400000	1.00:1.01:1.47:1.08:2.52	13819	hypothetical protein HUR95_16140 [Caldalkalibacillus thermarum TA2.A1]
106	19	QZT33106.1	15.24	60	18	18	256000000	274000000	235000000	215000000	247000000	105000000	108000000	87500000	75700000	84900000	1.00:1.03:0.84:0.72:0.81	45726	cell division protein FtsA [Caldalkalibacillus thermarum TA2.A1]
674	741	QZT32867.1	15.18	53	4	4	46800000	56100000	37800000	43800000	16300000	46600000	56000000	37000000	42600000	15800000	1.00:1.20:0.80:0.91:0.34	18160	PTS glucose transporter subunit IIA [Caldalkalibacillus thermarum TA2.A1]
30	379	QZT34337.1	15.16	55	31	31	381000000	497000000	459000000	499000000	295000000	89400000	116000000	121000000	147000000	88300000	1.00:1.30:1.36:1.64:0.99	75953	methionine--tRNA ligase [Caldalkalibacillus thermarum TA2.A1]
742	253	QZT33091.1	15.13	16	3	3	379000000	327000000	67700000	81600000	313000000	348000000	279000000	61600000	75000000	294000000	1.00:0.80:0.18:0.22:0.85	36273	TAXI family TRAP transporter solute-binding subunit [Caldalkalibacillus thermarum TA2.A1]
664	360	QZT34293.1	15.05	16	2	2	10100000	10100000	10300000	11100000	5030000	10100000	10100000	10300000	11100000	5030000	1.00:1.00:1.02:1.10:0.50	24555	protein jag [Caldalkalibacillus thermarum TA2.A1]
593	256	QZT35343.1	15.05	29	7	7	43200000	75200000	96400000	63300000	48700000	26900000	51000000	71600000	44100000	34300000	1.00:1.90:2.66:1.64:1.27	42660	hypothetical protein HUR95_06915 [Caldalkalibacillus thermarum TA2.A1]
1069	491	QZT33900.1	15.01	26	5	5	6900000	6390000	6350000	6880000	7720000	6070000	5690000	4960000	5450000	6170000	1.00:0.94:0.82:0.90:1.02	34886	prolipoprotein diacylglyceryl transferase [Caldalkalibacillus thermarum TA2.A1]
603	1562	QZT32793.1	14.99	25	7	7	14700000	14300000	12100000	15900000	17200000	9290000	9740000	8190000	11400000	12100000	1.00:1.05:0.88:1.22:1.30	33469	YicC family protein [Caldalkalibacillus thermarum TA2.A1]
286	1136	QZT32776.1	14.93	66	16	16	46000000	147000000	88200000	105000000	94700000	22000000	70500000	44100000	56900000	50000000	1.00:3.20:2.00:2.58:2.27	35848	aspartate carbamoyltransferase catalytic subunit [Caldalkalibacillus thermarum TA2.A1]
822	3740	QZT34221.1	14.88	21	4	4	8090000	7600000	10000000	5830000	4310000	7540000	7030000	8330000	4930000	3970000	1.00:0.93:1.10:0.65:0.53	32325	haloacid dehalogenase-like hydrolase [Caldalkalibacillus thermarum TA2.A1]
914	341	QZT34424.1	14.88	58	7	7	295000000	197000000	236000000	265000000	212000000	194000000	127000000	144000000	164000000	127000000	1.00:0.65:0.74:0.84:0.65	10638	30S ribosomal protein S19 [Caldalkalibacillus thermarum TA2.A1]
94	2541	QZT32672.1	14.86	60	18	18	503000000	766000000	411000000	315000000	274000000	218000000	343000000	176000000	126000000	118000000	1.00:1.58:0.81:0.58:0.54	50838	dihydrolipoyl dehydrogenase [Caldalkalibacillus thermarum TA2.A1]
1128	3511	QZT33775.1	14.81	10	2	2	2710000	1440000	5200000	2620000	4500000	2710000	1440000	5200000	2620000	4500000	1.00:0.53:1.92:0.97:1.66	29955	5-deoxy-glucuronate isomerase [Caldalkalibacillus thermarum TA2.A1]
1437	2702	QZT34429.1	14.8	22	2	2	40300000	33500000	19200000	16000000	21200000	40300000	33500000	19200000	16000000	21200000	1.00:0.83:0.48:0.40:0.53	10338	30S ribosomal protein S17 [Caldalkalibacillus thermarum TA2.A1]
8	41	QZT34898.1	14.74	64	39	39	2640000000	1570000000	1310000000	1660000000	1630000000	586000000	385000000	321000000	430000000	372000000	1.00:0.66:0.55:0.73:0.63	98824	aconitate hydratase AcnA [Caldalkalibacillus thermarum TA2.A1]
11	394	QZT35363.1	14.74	40	35	35	126000000	123000000	136000000	194000000	96800000	37500000	36400000	39800000	54600000	28700000	1.00:0.97:1.06:1.46:0.77	134488	helicase-exonuclease AddAB subunit AddB [Caldalkalibacillus thermarum TA2.A1]
527	189	QZT35340.1	14.73	41	10	10	93700000	84700000	76800000	98100000	64600000	46100000	44600000	40100000	53600000	34200000	1.00:0.97:0.87:1.16:0.74	36149	acetyl-CoA carboxylase carboxyl transferase subunit alpha [Caldalkalibacillus thermarum TA2.A1]
508	84	QZT34167.1	14.71	43	10	10	93500000	120000000	173000000	121000000	134000000	47200000	58600000	87800000	64100000	71500000	1.00:1.24:1.86:1.36:1.52	31892	F0F1 ATP synthase subunit gamma [Caldalkalibacillus thermarum TA2.A1]
378	2621	QZT32812.1	14.71	33	6	6	28700000	34800000	27100000	21900000	35300000	25500000	31000000	21000000	18400000	28500000	1.00:1.22:0.82:0.72:1.12	35697	ketoacyl-ACP synthase III [Caldalkalibacillus thermarum TA2.A1]
996	1902	QZT34829.1	14.62	60	6	6	150000000	73700000	53100000	60100000	65300000	136000000	66600000	46700000	52400000	60000000	1.00:0.49:0.34:0.39:0.44	10544	YciI family protein [Caldalkalibacillus thermarum TA2.A1]
492	134	QZT34283.1	14.62	50	10	10	43400000	42700000	53900000	53700000	47500000	22100000	22100000	27100000	28200000	24500000	1.00:1.00:1.23:1.27:1.11	40256	redox-regulated ATPase YchF [Caldalkalibacillus thermarum TA2.A1]
149	237	QZT33538.1	14.61	28	19	19	76100000	74000000	83200000	67000000	100000000	29500000	20600000	26200000	20300000	24900000	1.00:0.70:0.89:0.69:0.84	87848	endopeptidase La [Caldalkalibacillus thermarum TA2.A1]
73	303	QZT33103.1	14.58	58	27	27	181000000	185000000	184000000	179000000	148000000	40000000	37400000	45000000	46900000	32500000	1.00:0.93:1.12:1.17:0.81	64868	arginine--tRNA ligase [Caldalkalibacillus thermarum TA2.A1]
509	1404	QZT34332.1	14.57	30	8	8	16800000	18200000	19500000	19400000	18700000	12800000	13600000	15500000	14200000	14400000	1.00:1.06:1.21:1.11:1.13	31549	stage 0 sporulation family protein [Caldalkalibacillus thermarum TA2.A1]
1262	6812	QZT33093.1	14.5	48	5	5	68100000	64200000	49500000	46700000	52500000	31100000	30900000	21000000	22400000	19400000	1.00:0.99:0.67:0.72:0.62	5234	FbpB family small basic protein [Caldalkalibacillus thermarum TA2.A1]
1449	535	QZT35430.1	14.46	3	2	2	2840000	3140000	2510000	3460000	2140000	2840000	3140000	2510000	3460000	2140000	1.00:1.11:0.88:1.22:0.76	57044	IS5 family transposase [Caldalkalibacillus thermarum TA2.A1]
1449	536	QZT35292.1	14.46	3	2	2	2840000	3140000	2510000	3460000	2140000	2840000	3140000	2510000	3460000	2140000	1.00:1.11:0.88:1.22:0.76	57597	IS5 family transposase [Caldalkalibacillus thermarum TA2.A1]
1117	732	QZT34768.1	14.4	16	2	2	4280000	3590000	3230000	3140000	3220000	4280000	3590000	3230000	3140000	3220000	1.00:0.84:0.76:0.73:0.75	28109	HAD family hydrolase [Caldalkalibacillus thermarum TA2.A1]
639	319	QZT34048.1	14.36	13	4	4	3990000	4240000	4460000	3020000	5050000	3870000	4090000	4280000	2640000	4650000	1.00:1.06:1.11:0.68:1.20	39073	glycosyltransferase family 2 protein [Caldalkalibacillus thermarum TA2.A1]
1035	6705	QZT33274.1	14.36	30	2	2	481000000	253000000	112000000	172000000	75700000	481000000	253000000	112000000	172000000	75700000	1.00:0.53:0.23:0.36:0.16	7361	cold-shock protein [Caldalkalibacillus thermarum TA2.A1]
333	533	QZT34407.1	14.26	64	9	9	154000000	154000000	170000000	244000000	184000000	95500000	94100000	123000000	178000000	133000000	1.00:0.99:1.29:1.87:1.39	20279	transcription termination/antitermination protein NusG [Caldalkalibacillus thermarum TA2.A1]
1099	784	QZT34188.1	14.25	57	4	4	115000000	74700000	74100000	70600000	56800000	113000000	73400000	72400000	68200000	54500000	1.00:0.65:0.64:0.60:0.48	7730	50S ribosomal protein L31 [Caldalkalibacillus thermarum TA2.A1]
1265	28239	QZT33649.1	14.25	56	5	5	23400000	21900000	21600000	30800000	35000000	16300000	17400000	15100000	22000000	25500000	1.00:1.07:0.93:1.35:1.57	9600	hypothetical protein HUR95_15690 [Caldalkalibacillus thermarum TA2.A1]
164	615	QZT35177.1	14.17	73	23	23	891000000	684000000	804000000	690000000	1190000000	256000000	208000000	211000000	191000000	282000000	1.00:0.81:0.82:0.75:1.10	40243	bis-aminopropyl spermidine synthase family protein [Caldalkalibacillus thermarum TA2.A1]
767	1124	QZT32914.1	14.03	87	8	8	271000000	144000000	129000000	225000000	150000000	236000000	129000000	110000000	191000000	128000000	1.00:0.55:0.47:0.81:0.54	8229	sulfurtransferase TusA family protein [Caldalkalibacillus thermarum TA2.A1]
1005	2297	QZT32697.1	14	8	2	2	1890000	2840000	2040000	1830000	1380000	1890000	2840000	2040000	1830000	1380000	1.00:1.50:1.08:0.97:0.73	31750	lipoate--protein ligase family protein [Caldalkalibacillus thermarum TA2.A1]
392	569	QZT33397.1	13.91	21	4	4	23500000	24000000	15800000	20600000	22800000	19800000	20400000	13900000	17700000	19200000	1.00:1.03:0.70:0.89:0.97	35318	50S ribosomal protein L11 methyltransferase [Caldalkalibacillus thermarum TA2.A1]
469	9678	QZT33366.1	13.9	48	11	11	45500000	48800000	45000000	37900000	32300000	24800000	27900000	23300000	19900000	15300000	1.00:1.12:0.94:0.80:0.62	34402	glycine--tRNA ligase subunit alpha [Caldalkalibacillus thermarum TA2.A1]
117	220	QZT33885.1	13.9	72	23	23	1420000000	2290000000	3000000000	1760000000	1400000000	720000000	1170000000	1650000000	965000000	768000000	1.00:1.62:2.29:1.34:1.07	42506	phosphoglycerate kinase [Caldalkalibacillus thermarum TA2.A1]
616	6770	QZT35484.1	13.85	36	8	8	66100000	64500000	52500000	69200000	40900000	35800000	36800000	29400000	37500000	21400000	1.00:1.03:0.82:1.05:0.60	30612	ribonuclease PH [Caldalkalibacillus thermarum TA2.A1]
384	146	QZT34191.1	13.78	33	13	13	51000000	61300000	65600000	49300000	48000000	27400000	31500000	35900000	25200000	27300000	1.00:1.15:1.31:0.92:1.00	47942	transcription termination factor Rho [Caldalkalibacillus thermarum TA2.A1]
806	2196	QZT32797.1	13.74	19	6	6	16100000	18400000	11800000	15700000	15000000	10400000	12300000	8450000	10500000	10100000	1.00:1.19:0.81:1.01:0.98	45210	bifunctional phosphopantothenoylcysteine decarboxylase/phosphopantothenate--cysteine ligase CoaBC [Caldalkalibacillus thermarum TA2.A1]
587	18992	QZT33341.1	13.7	12	3	3	2800000	5940000	7030000	3460000	8550000	2800000	5940000	7030000	3460000	8550000	1.00:2.12:2.51:1.24:3.06	36235	LysM peptidoglycan-binding domain-containing protein [Caldalkalibacillus thermarum TA2.A1]
142	216	QZT33818.1	13.67	53	16	16	155000000	221000000	309000000	335000000	233000000	69700000	102000000	135000000	139000000	96300000	1.00:1.47:1.94:1.99:1.38	51049	adenosylmethionine--8-amino-7-oxononanoate transaminase [Caldalkalibacillus thermarum TA2.A1]
853	129	QZT35004.1	13.65	6	2	2	2450000	2560000	1610000	2860000	3290000	2450000	2560000	1610000	2860000	3290000	1.00:1.04:0.66:1.16:1.34	42558	tetraprenyl-beta-curcumene synthase family protein [Caldalkalibacillus thermarum TA2.A1]
291	2764	QZT32913.1	13.63	69	12	12	425000000	351000000	346000000	549000000	365000000	207000000	178000000	175000000	274000000	192000000	1.00:0.86:0.85:1.33:0.93	21012	sulfurtransferase TusA family protein [Caldalkalibacillus thermarum TA2.A1]
448	259	QZT32811.1	13.61	39	9	9	29800000	30000000	24000000	20000000	26800000	18900000	18000000	12900000	11200000	15600000	1.00:0.95:0.68:0.59:0.83	35311	phosphate acyltransferase PlsX [Caldalkalibacillus thermarum TA2.A1]
63	619	QZT34908.1	13.58	67	21	21	346000000	330000000	346000000	311000000	333000000	120000000	121000000	152000000	144000000	130000000	1.00:1.01:1.27:1.20:1.09	50382	glucose-6-phosphate isomerase [Caldalkalibacillus thermarum TA2.A1]
1494	643	QZT32805.1	13.34	24	2	2	28200000	32300000	23300000	15100000	21700000	28200000	32300000	23300000	15100000	21700000	1.00:1.14:0.83:0.53:0.77	7098	50S ribosomal protein L28 [Caldalkalibacillus thermarum TA2.A1]
625	354	QZT34925.1	13.24	23	7	7	9250000	10400000	8170000	7840000	14500000	6010000	7070000	6220000	6060000	10400000	1.00:1.18:1.03:1.01:1.74	47977	sensor domain-containing diguanylate cyclase [Caldalkalibacillus thermarum TA2.A1]
796	1507	QZT32989.1	13.23	6	3	3	7920000	17300000	20400000	10300000	10900000	7920000	17300000	20400000	10300000	10900000	1.00:2.19:2.57:1.30:1.37	46586	RIP metalloprotease RseP [Caldalkalibacillus thermarum TA2.A1]
678	488	QZT34411.1	13.23	90	9	9	533000000	603000000	223000000	262000000	323000000	377000000	465000000	188000000	210000000	265000000	1.00:1.23:0.50:0.56:0.70	12714	50S ribosomal protein L7/L12 [Caldalkalibacillus thermarum TA2.A1]
826	3873	QZT33567.1	13.18	6	2	2	1170000	1540000	929000	400000	371000	1170000	1540000	929000	400000	371000	1.00:1.31:0.80:0.34:0.32	60119	long-chain fatty acid--CoA ligase [Caldalkalibacillus thermarum TA2.A1]
504	179	QZT32819.1	13.11	29	7	7	48100000	49200000	53600000	46300000	43200000	36400000	36700000	34500000	31700000	27600000	1.00:1.01:0.95:0.87:0.76	37064	signal recognition particle-docking protein FtsY [Caldalkalibacillus thermarum TA2.A1]
652	1784	QZT32656.1	13.08	7	3	3	1740000	1980000	1740000	1190000	1930000	1740000	1980000	1740000	1190000	1930000	1.00:1.14:1.00:0.68:1.11	52172	exodeoxyribonuclease VII large subunit [Caldalkalibacillus thermarum TA2.A1]
792	3225	QZT35485.1	13.07	14	2	2	2210000	3020000	4460000	3270000	7430000	2210000	3020000	4460000	3270000	7430000	1.00:1.37:2.02:1.48:3.37	30001	glutamate racemase [Caldalkalibacillus thermarum TA2.A1]
1407	1423	QZT34154.1	13.03	4	2	2	1850000	1830000	1230000	1390000	1170000	1850000	1830000	1230000	1390000	1170000	1.00:0.99:0.67:0.75:0.63	56156	NADH-quinone oxidoreductase subunit NuoN [Caldalkalibacillus thermarum TA2.A1]
799	153	QZT33257.1	12.97	57	5	5	96900000	85300000	128000000	207000000	93900000	91800000	81700000	122000000	199000000	90000000	1.00:0.89:1.32:2.17:0.98	14674	YugN-like family protein [Caldalkalibacillus thermarum TA2.A1]
737	6556	QZT34542.1	12.96	44	8	8	203000000	181000000	272000000	308000000	344000000	149000000	137000000	189000000	220000000	226000000	1.00:0.92:1.27:1.47:1.52	22040	NAD(P)H:quinone oxidoreductase [Caldalkalibacillus thermarum TA2.A1]
314	281	QZT34092.1	12.95	31	8	8	19500000	25200000	32300000	21100000	109000000	12100000	16100000	18300000	12000000	61100000	1.00:1.33:1.51:0.99:5.04	42413	ABC transporter ATP-binding protein [Caldalkalibacillus thermarum TA2.A1]
25	13	QZT33842.1	12.91	48	28	15	130000000	54200000	135000000	300000000	198000000	56200000	26500000	68500000	150000000	106000000	1.00:0.47:1.22:2.68:1.88	82336	catalase/peroxidase HPI [Caldalkalibacillus thermarum TA2.A1]
602	34176	QZT34933.1	12.9	84	4	4	26700000	13100000	13100000	28200000	17400000	24000000	11700000	11700000	25700000	16000000	1.00:0.49:0.49:1.07:0.67	11740	SCP2 sterol-binding domain-containing protein [Caldalkalibacillus thermarum TA2.A1]
20	571	QZT33414.1	12.88	38	21	21	89000000	124000000	121000000	97500000	96500000	40200000	56600000	54800000	41800000	38300000	1.00:1.41:1.36:1.04:0.95	93127	leucine--tRNA ligase [Caldalkalibacillus thermarum TA2.A1]
300	390	QZT34910.1	12.87	36	12	12	87100000	88500000	53900000	70100000	53100000	37700000	37600000	23700000	28100000	20200000	1.00:1.00:0.63:0.74:0.54	48950	CBS domain-containing protein [Caldalkalibacillus thermarum TA2.A1]
16	74	QZT33208.1	12.86	68	32	32	1130000000	1130000000	1070000000	529000000	599000000	273000000	287000000	267000000	114000000	130000000	1.00:1.05:0.98:0.42:0.48	84818	pyruvate synthase [Caldalkalibacillus thermarum TA2.A1]
1012	470	QZT32978.1	12.86	11	2	2	2850000	2900000	3270000	3220000	3870000	2850000	2900000	3270000	3220000	3870000	1.00:1.02:1.15:1.13:1.36	35096	bifunctional riboflavin kinase/FAD synthetase [Caldalkalibacillus thermarum TA2.A1]
1208	803	QZT33092.1	12.79	4	2	2	11200000	4580000	6090000	7450000	10900000	11200000	4580000	6090000	7450000	10900000	1.00:0.41:0.54:0.67:0.98	71251	TRAP transporter permease [Caldalkalibacillus thermarum TA2.A1]
317	1812	QZT34877.1	12.78	58	12	12	86800000	95300000	115000000	116000000	73100000	41200000	43800000	62700000	66900000	43900000	1.00:1.06:1.52:1.62:1.07	37800	NADPH dehydrogenase NamA [Caldalkalibacillus thermarum TA2.A1]
788	3194	QZT33333.1	12.76	23	4	4	9720000	8390000	5390000	6820000	10700000	9060000	7230000	5240000	6530000	10200000	1.00:0.80:0.58:0.72:1.12	24197	TrkA family potassium uptake protein [Caldalkalibacillus thermarum TA2.A1]
686	621	QZT35008.1	12.76	5	2	2	1900000	1930000	6430000	5540000	6610000	1900000	1930000	6430000	5540000	6610000	1.00:1.02:3.38:2.91:3.47	43880	LL-diaminopimelate aminotransferase [Caldalkalibacillus thermarum TA2.A1]
1033	3288	QZT34368.1	12.76	26	5	5	13400000	14700000	17800000	18500000	14900000	10600000	11300000	13200000	13100000	10400000	1.00:1.07:1.25:1.23:0.98	28227	type III pantothenate kinase [Caldalkalibacillus thermarum TA2.A1]
1134	2631	QZT33265.1	12.74	13	2	2	6420000	8030000	6570000	12700000	6720000	6420000	8030000	6570000	12700000	6720000	1.00:1.25:1.02:1.98:1.05	20372	DUF309 domain-containing protein [Caldalkalibacillus thermarum TA2.A1]
1183	6724	QZT33462.1	12.74	53	4	4	190000000	129000000	82700000	127000000	67300000	177000000	121000000	73900000	111000000	57500000	1.00:0.69:0.42:0.63:0.33	10718	IreB family regulatory phosphoprotein [Caldalkalibacillus thermarum TA2.A1]
83	163	QZT32695.1	12.66	61	20	20	195000000	243000000	172000000	132000000	112000000	82000000	95100000	74900000	56200000	42300000	1.00:1.16:0.91:0.69:0.52	40574	glycine cleavage system aminomethyltransferase GcvT [Caldalkalibacillus thermarum TA2.A1]
143	1195	QZT33163.1	12.57	64	19	19	224000000	249000000	219000000	146000000	300000000	90100000	96200000	86100000	54900000	106000000	1.00:1.07:0.96:0.61:1.17	46483	pyrimidine-nucleoside phosphorylase [Caldalkalibacillus thermarum TA2.A1]
405	25236	QZT33473.1	12.56	27	9	9	36400000	48000000	46900000	48500000	44700000	20300000	27800000	26700000	29000000	26600000	1.00:1.37:1.32:1.43:1.31	48139	histidine--tRNA ligase [Caldalkalibacillus thermarum TA2.A1]
417	775	QZT35171.1	12.56	37	8	8	36700000	32700000	23100000	21300000	37600000	26100000	22900000	16200000	13700000	23400000	1.00:0.88:0.62:0.53:0.90	37943	WYL domain-containing protein [Caldalkalibacillus thermarum TA2.A1]
887	22080	QZT34397.1	12.45	74	7	7	74100000	62100000	118000000	114000000	67100000	46300000	41900000	84800000	76400000	46900000	1.00:0.91:1.83:1.65:1.01	17321	2-C-methyl-D-erythritol 2 4-cyclodiphosphate synthase [Caldalkalibacillus thermarum TA2.A1]
952	2248	QZT34329.1	12.44	19	3	3	10800000	13900000	15200000	13400000	9740000	10800000	13900000	15200000	13400000	9740000	1.00:1.29:1.41:1.24:0.90	24043	dTMP kinase [Caldalkalibacillus thermarum TA2.A1]
635	95	QZT34169.1	12.35	52	9	9	73900000	95600000	98300000	64800000	94400000	41100000	53600000	52200000	34600000	53800000	1.00:1.30:1.27:0.84:1.31	20285	F0F1 ATP synthase subunit delta [Caldalkalibacillus thermarum TA2.A1]
1316	34246	QZT34443.1	12.35	50	5	5	29000000	17300000	16400000	16000000	10200000	23300000	12500000	11600000	12200000	7400000	1.00:0.54:0.50:0.53:0.32	11519	KOW domain-containing RNA-binding protein [Caldalkalibacillus thermarum TA2.A1]
585	2543	QZT32531.1	12.28	33	5	5	27500000	25000000	40000000	39500000	28200000	20900000	18800000	32300000	31600000	23600000	1.00:0.90:1.55:1.51:1.13	32172	MBL fold metallo-hydrolase [Caldalkalibacillus thermarum TA2.A1]
173	192	QZT32750.1	12.21	77	20	20	447000000	435000000	469000000	357000000	385000000	157000000	160000000	186000000	142000000	147000000	1.00:1.01:1.18:0.90:0.93	43308	pyridoxal phosphate-dependent aminotransferase [Caldalkalibacillus thermarum TA2.A1]
450	3643	QZT32682.1	12.21	38	8	8	37200000	38100000	30800000	31800000	46700000	27100000	28100000	19200000	22300000	28900000	1.00:1.04:0.71:0.82:1.07	32119	sulfurtransferase [Caldalkalibacillus thermarum TA2.A1]
629	31232	QZT32540.1	12.18	52	9	9	81900000	71600000	79300000	64100000	60200000	60700000	53500000	60100000	50900000	47100000	1.00:0.88:0.99:0.84:0.78	32420	alpha/beta hydrolase [Caldalkalibacillus thermarum TA2.A1]
237	561	QZT34068.1	12.16	5	2	2	2210000	10900000	7300000	16200000	2480000	2210000	10900000	7300000	16200000	2480000	1.00:4.92:3.30:7.33:1.12	58481	glutathione ABC transporter substrate-binding protein [Caldalkalibacillus thermarum TA2.A1]
480	838	QZT32677.1	12.12	8	3	3	5260000	4260000	2950000	9170000	4160000	5260000	4260000	2950000	9170000	4160000	1.00:0.81:0.56:1.74:0.79	62221	methylmalonyl-CoA mutase family protein [Caldalkalibacillus thermarum TA2.A1]
358	70	QZT34423.1	12.11	59	14	14	395000000	359000000	226000000	215000000	255000000	220000000	206000000	130000000	114000000	124000000	1.00:0.94:0.59:0.52:0.56	30615	50S ribosomal protein L2 [Caldalkalibacillus thermarum TA2.A1]
139	359	QZT34976.1	12.06	48	23	23	84200000	102000000	114000000	121000000	129000000	30000000	37300000	39400000	44000000	45100000	1.00:1.24:1.31:1.46:1.50	74468	threonine--tRNA ligase [Caldalkalibacillus thermarum TA2.A1]
195	436	QZT34769.1	11.99	55	16	16	278000000	238000000	273000000	298000000	249000000	124000000	117000000	154000000	159000000	135000000	1.00:0.95:1.24:1.28:1.09	44846	amidohydrolase [Caldalkalibacillus thermarum TA2.A1]
618	2623	QZT34032.1	11.96	36	6	6	42600000	41800000	31000000	41700000	25100000	36800000	35900000	25300000	33600000	20700000	1.00:0.98:0.69:0.91:0.56	24128	YigZ family protein [Caldalkalibacillus thermarum TA2.A1]
315	66	QZT35063.1	11.95	50	12	12	220000000	208000000	176000000	244000000	180000000	96400000	84600000	81800000	125000000	97800000	1.00:0.88:0.85:1.30:1.01	23207	30S ribosomal protein S4 [Caldalkalibacillus thermarum TA2.A1]
870	781	QZT33382.1	11.9	84	8	8	1560000000	1610000000	1250000000	1730000000	1140000000	1180000000	1240000000	933000000	1310000000	852000000	1.00:1.05:0.79:1.10:0.72	12195	histidine triad nucleotide-binding protein [Caldalkalibacillus thermarum TA2.A1]
988	3298	QZT34181.1	11.9	71	7	7	90200000	98000000	88500000	73100000	74700000	71100000	75200000	60200000	50200000	51900000	1.00:1.06:0.85:0.71:0.73	16272	ribose 5-phosphate isomerase B [Caldalkalibacillus thermarum TA2.A1]
486	4003	QZT34875.1	11.75	22	5	5	20800000	19800000	20200000	15900000	16700000	16900000	15700000	16500000	14000000	15100000	1.00:0.93:0.98:0.83:0.89	41496	iron-containing alcohol dehydrogenase [Caldalkalibacillus thermarum TA2.A1]
1068	3648	QZT33781.1	11.73	6	2	2	1660000	765000	2550000	1710000	2890000	1660000	765000	2550000	1710000	2890000	1.00:0.46:1.53:1.03:1.74	43571	glycoside hydrolase family 105 protein [Caldalkalibacillus thermarum TA2.A1]
257	123	QZT32539.1	11.73	30	13	13	27300000	26700000	38500000	27300000	48900000	13700000	14000000	21200000	14600000	24700000	1.00:1.02:1.54:1.06:1.80	73331	selenocysteine-specific translation elongation factor [Caldalkalibacillus thermarum TA2.A1]
370	402	QZT32669.1	11.69	9	4	4	2120000	2680000	3270000	2310000	2820000	2060000	2540000	2820000	2170000	2660000	1.00:1.24:1.37:1.05:1.29	77669	sigma 54-interacting transcriptional regulator [Caldalkalibacillus thermarum TA2.A1]
1315	1300	QZT32905.1	11.64	23	2	2	3790000	4370000	9420000	8570000	10800000	2870000	3470000	7880000	6940000	8660000	1.00:1.21:2.75:2.42:3.02	14223	DsrE/DsrF/DrsH-like family protein [Caldalkalibacillus thermarum TA2.A1]
596	1537	QZT32707.1	11.59	72	13	13	97100000	118000000	128000000	128000000	111000000	53200000	65300000	73900000	69200000	55800000	1.00:1.23:1.39:1.30:1.05	23103	GTP cyclohydrolase I FolE [Caldalkalibacillus thermarum TA2.A1]
1431	2044	QZT35401.1	11.59	11	2	2	14500000	17300000	9870000	9000000	11100000	14500000	17300000	9870000	9000000	11100000	1.00:1.19:0.68:0.62:0.76	34888	heme o synthase [Caldalkalibacillus thermarum TA2.A1]
777	793	QZT32589.1	11.56	33	8	8	25400000	23900000	17700000	29500000	22200000	17200000	15100000	11900000	20100000	14700000	1.00:0.88:0.70:1.17:0.86	31949	DUF1444 domain-containing protein [Caldalkalibacillus thermarum TA2.A1]
655	1712	QZT34811.1	11.55	50	7	7	42100000	35800000	30100000	26600000	56300000	34100000	30400000	24800000	22300000	45900000	1.00:0.89:0.73:0.65:1.34	19058	dUTP diphosphatase [Caldalkalibacillus thermarum TA2.A1]
601	395	QZT34410.1	11.51	58	8	8	124000000	124000000	73400000	57400000	60600000	90200000	82700000	52400000	43400000	45500000	1.00:0.92:0.58:0.48:0.50	18645	50S ribosomal protein L10 [Caldalkalibacillus thermarum TA2.A1]
151	633	QZT32907.1	11.45	72	20	20	126000000	161000000	151000000	139000000	185000000	45000000	51600000	49200000	44200000	60200000	1.00:1.15:1.09:0.98:1.34	42430	MBL fold metallo-hydrolase [Caldalkalibacillus thermarum TA2.A1]
683	675	QZT32530.1	11.42	52	6	6	9150000	8070000	9580000	12200000	11400000	5740000	5020000	6850000	9270000	8970000	1.00:0.87:1.19:1.61:1.56	25866	tRNA (guanosine(46)-N7)-methyltransferase TrmB [Caldalkalibacillus thermarum TA2.A1]
752	397	QZT35116.1	11.36	44	6	6	21100000	16900000	13800000	18600000	9910000	15500000	13700000	9680000	13600000	7990000	1.00:0.89:0.63:0.88:0.52	24458	GTP pyrophosphokinase family protein [Caldalkalibacillus thermarum TA2.A1]
543	3778	QZT33165.1	11.24	55	11	11	118000000	143000000	173000000	112000000	176000000	64700000	76800000	82100000	57300000	88800000	1.00:1.19:1.27:0.89:1.37	29298	purine-nucleoside phosphorylase [Caldalkalibacillus thermarum TA2.A1]
534	477	QZT34426.1	11.2	50	11	11	371000000	352000000	288000000	313000000	222000000	236000000	228000000	186000000	212000000	143000000	1.00:0.97:0.79:0.90:0.61	24559	30S ribosomal protein S3 [Caldalkalibacillus thermarum TA2.A1]
972	6817	QZT33734.1	11.18	17	3	3	13900000	11300000	7800000	7700000	8620000	11900000	9670000	6840000	6580000	7450000	1.00:0.81:0.58:0.55:0.63	33444	cysteine synthase A [Caldalkalibacillus thermarum TA2.A1]
276	652	QZT35293.1	11.15	21	6	6	17800000	16300000	25700000	17100000	18800000	12900000	11500000	17900000	13400000	13800000	1.00:0.90:1.39:1.04:1.08	51097	amidophosphoribosyltransferase [Caldalkalibacillus thermarum TA2.A1]
339	374	QZT33534.1	11.11	37	12	12	145000000	182000000	209000000	146000000	191000000	77700000	108000000	113000000	76400000	108000000	1.00:1.39:1.46:0.98:1.39	34215	hydroxymethylbilane synthase [Caldalkalibacillus thermarum TA2.A1]
352	313	QZT34845.1	11.09	60	16	16	113000000	109000000	118000000	123000000	75300000	45600000	44500000	52100000	57900000	31200000	1.00:0.98:1.14:1.27:0.68	36431	D-2-hydroxyacid dehydrogenase [Caldalkalibacillus thermarum TA2.A1]
973	3212	QZT34113.1	11.07	7	2	2	757000	322000	454000	822000	949000	757000	322000	454000	822000	949000	1.00:0.43:0.60:1.09:1.25	50098	aspartate aminotransferase family protein [Caldalkalibacillus thermarum TA2.A1]
214	331	QZT32943.1	11	29	12	12	69400000	76200000	88700000	78200000	120000000	33500000	39300000	58200000	49100000	72200000	1.00:1.17:1.74:1.47:2.16	58566	tRNA (N6-isopentenyl adenosine(37)-C2)-methylthiotransferase MiaB [Caldalkalibacillus thermarum TA2.A1]
61	208	QZT34351.1	10.98	18	16	16	23700000	24800000	29600000	30400000	39000000	7500000	7530000	8030000	8740000	11500000	1.00:1.00:1.07:1.17:1.53	136739	transcription-repair coupling factor [Caldalkalibacillus thermarum TA2.A1]
334	523	QZT32642.1	10.98	49	13	13	112000000	99300000	112000000	101000000	153000000	46000000	43100000	49600000	41800000	58900000	1.00:0.94:1.08:0.91:1.28	39425	Xaa-Pro peptidase family protein [Caldalkalibacillus thermarum TA2.A1]
908	307	QZT34864.1	10.87	14	3	3	6020000	6560000	5760000	4560000	8020000	6020000	6560000	5760000	4560000	8020000	1.00:1.09:0.96:0.76:1.33	27997	ABC transporter ATP-binding protein [Caldalkalibacillus thermarum TA2.A1]
964	433	QZT34400.1	10.78	20	4	4	5520000	4530000	3910000	4540000	4550000	5150000	4270000	3730000	4370000	4370000	1.00:0.83:0.72:0.85:0.85	27074	23S rRNA (guanosine(2251)-2'-O)-methyltransferase RlmB [Caldalkalibacillus thermarum TA2.A1]
259	504	QZT32985.1	10.73	41	15	15	91700000	87100000	85200000	84100000	92700000	42700000	40100000	41400000	41400000	45900000	1.00:0.94:0.97:0.97:1.08	45837	transcription termination factor NusA [Caldalkalibacillus thermarum TA2.A1]
1080	3328	QZT34320.1	10.69	17	2	2	1150000	1010000	760000	925000	368000	1150000	1010000	760000	925000	368000	1.00:0.88:0.66:0.80:0.32	18269	tRNA adenosine(34) deaminase TadA [Caldalkalibacillus thermarum TA2.A1]
617	2321	QZT32846.1	10.67	89	12	12	87600000	85800000	102000000	133000000	108000000	67400000	70800000	75000000	90500000	70400000	1.00:1.05:1.11:1.34:1.04	19406	type 1 glutamine amidotransferase [Caldalkalibacillus thermarum TA2.A1]
536	555	QZT33803.1	10.58	6	2	2	1710000	2180000	5410000	3790000	3740000	1710000	2180000	5410000	3790000	3740000	1.00:1.28:3.16:2.22:2.19	55119	adenosylcobinamide amidohydrolase [Caldalkalibacillus thermarum TA2.A1]
491	3047	QZT33287.1	10.54	38	8	8	27400000	28200000	25700000	22700000	25900000	16500000	17300000	16600000	15100000	17900000	1.00:1.04:1.01:0.91:1.08	40627	glycerate kinase [Caldalkalibacillus thermarum TA2.A1]
694	981	QZT35322.1	10.52	48	8	8	41400000	19700000	40100000	50400000	42500000	26700000	14400000	27000000	33600000	28800000	1.00:0.54:1.01:1.26:1.08	15828	CoA-binding protein [Caldalkalibacillus thermarum TA2.A1]
120	23	QZT34889.1	10.45	59	20	20	240000000	180000000	173000000	155000000	145000000	94800000	65500000	55400000	54300000	46500000	1.00:0.69:0.58:0.57:0.49	47247	2-oxoglutarate dehydrogenase complex dihydrolipoyllysine-residue succinyltransferase [Caldalkalibacillus thermarum TA2.A1]
1038	2788	QZT34341.1	10.44	64	5	5	86100000	61200000	44000000	42100000	55900000	81800000	60000000	42300000	38300000	50000000	1.00:0.73:0.52:0.47:0.61	10641	Veg family protein [Caldalkalibacillus thermarum TA2.A1]
935	1945	QZT34372.1	10.43	7	2	2	3580000	2660000	4190000	4910000	4210000	2230000	1570000	2450000	2660000	2450000	1.00:0.70:1.10:1.19:1.10	21860	aminodeoxychorismate/anthranilate synthase component II [Caldalkalibacillus thermarum TA2.A1]
18	346	QZT33463.1	10.33	38	23	23	119000000	153000000	126000000	129000000	128000000	33300000	41500000	31500000	26900000	30200000	1.00:1.25:0.95:0.81:0.91	97791	alanine--tRNA ligase [Caldalkalibacillus thermarum TA2.A1]
123	609	QZT33540.1	10.27	44	13	13	126000000	180000000	167000000	105000000	112000000	55600000	84200000	72400000	46900000	44300000	1.00:1.52:1.30:0.84:0.80	46887	ATP-dependent protease ATP-binding subunit ClpX [Caldalkalibacillus thermarum TA2.A1]
302	1074	QZT33123.1	10.24	36	13	13	39400000	33200000	50300000	25800000	37400000	17800000	14900000	35300000	10500000	15700000	1.00:0.84:1.99:0.59:0.89	64093	bacillithiol biosynthesis cysteine-adding enzyme BshC [Caldalkalibacillus thermarum TA2.A1]
338	873	QZT33853.1	10.1	48	9	9	480000000	420000000	400000000	441000000	344000000	248000000	228000000	201000000	226000000	180000000	1.00:0.92:0.81:0.91:0.73	28706	heme-dependent peroxidase [Caldalkalibacillus thermarum TA2.A1]
1067	438	QZT32826.1	10.06	31	4	4	78000000	86700000	51300000	33300000	61200000	73300000	80100000	47300000	31200000	53300000	1.00:1.09:0.65:0.43:0.73	13379	50S ribosomal protein L19 [Caldalkalibacillus thermarum TA2.A1]
132	857	QZT35272.1	10.04	35	15	15	178000000	196000000	263000000	226000000	186000000	74200000	81300000	111000000	98200000	76000000	1.00:1.10:1.50:1.32:1.02	56947	glutamate--tRNA ligase [Caldalkalibacillus thermarum TA2.A1]
548	576	QZT33021.1	9.97	29	6	6	9690000	13000000	8940000	9110000	13100000	7760000	10300000	6890000	6960000	10300000	1.00:1.32:0.89:0.90:1.32	37637	flagellar motor switch protein FliG [Caldalkalibacillus thermarum TA2.A1]
704	719	QZT34589.1	9.97	85	9	9	3170000000	3270000000	3740000000	4350000000	2860000000	2680000000	2750000000	3210000000	3630000000	2370000000	1.00:1.03:1.20:1.35:0.89	10203	co-chaperone GroES [Caldalkalibacillus thermarum TA2.A1]
91	36	QZT33105.1	9.87	61	19	19	592000000	527000000	449000000	438000000	378000000	193000000	183000000	167000000	159000000	132000000	1.00:0.95:0.87:0.82:0.68	39757	cell division protein FtsZ [Caldalkalibacillus thermarum TA2.A1]
218	273	QZT34448.1	9.84	43	13	13	288000000	290000000	235000000	247000000	197000000	132000000	141000000	113000000	134000000	103000000	1.00:1.06:0.85:1.01:0.78	34752	DNA-directed RNA polymerase subunit alpha [Caldalkalibacillus thermarum TA2.A1]
610	1655	QZT33200.1	9.8	60	9	9	83600000	35400000	169000000	85700000	33100000	48800000	20300000	103000000	49800000	17900000	1.00:0.42:2.12:1.02:0.37	28039	iron-sulfur cluster repair di-iron protein [Caldalkalibacillus thermarum TA2.A1]
860	342	QZT34416.1	9.76	42	5	5	102000000	91600000	68500000	49900000	74100000	90900000	82100000	60300000	41900000	64200000	1.00:0.90:0.66:0.46:0.71	15317	30S ribosomal protein S12 [Caldalkalibacillus thermarum TA2.A1]
1073	4032	QZT33490.1	9.76	35	4	4	9210000	10100000	9110000	11300000	9530000	7840000	8900000	8430000	10700000	8920000	1.00:1.14:1.07:1.36:1.14	23666	Holliday junction branch migration protein RuvA [Caldalkalibacillus thermarum TA2.A1]
546	118	QZT34039.1	9.72	17	3	3	4780000	5750000	4320000	4980000	5160000	4780000	5750000	4320000	4980000	5160000	1.00:1.20:0.90:1.04:1.08	29688	WecB/TagA/CpsF family glycosyltransferase [Caldalkalibacillus thermarum TA2.A1]
332	295	QZT34941.1	9.69	59	14	14	71300000	72100000	67500000	70000000	77700000	31800000	30500000	26800000	30500000	34600000	1.00:0.96:0.84:0.96:1.09	32272	acetyl-CoA carboxylase carboxyltransferase subunit beta [Caldalkalibacillus thermarum TA2.A1]
1076	676	QZT34767.1	9.6	20	2	2	6680000	5260000	4830000	7000000	6020000	6680000	5260000	4830000	7000000	6020000	1.00:0.79:0.72:1.05:0.90	18202	tRNA (uridine(34)/cytosine(34)/5-carboxymethylaminomethyluridine(34)-2'-O)-methyltransferase TrmL [Caldalkalibacillus thermarum TA2.A1]
203	828	QZT34984.1	9.56	57	12	12	67800000	114000000	85800000	71000000	52100000	35800000	56600000	40300000	37900000	28600000	1.00:1.58:1.13:1.06:0.80	39361	M42 family metallopeptidase [Caldalkalibacillus thermarum TA2.A1]
177	198	QZT33470.1	9.43	57	17	17	107000000	105000000	109000000	109000000	90700000	44300000	40600000	37500000	37500000	32400000	1.00:0.92:0.85:0.85:0.73	50166	AAA family ATPase [Caldalkalibacillus thermarum TA2.A1]
278	567	QZT35159.1	9.39	52	12	12	44600000	46700000	51900000	66200000	36500000	28500000	30800000	31200000	39500000	24300000	1.00:1.08:1.09:1.39:0.85	43730	exonuclease SbcCD subunit D [Caldalkalibacillus thermarum TA2.A1]
537	612	QZT34626.1	9.33	27	6	6	10700000	9960000	15200000	17000000	12700000	9690000	8950000	13200000	15400000	11100000	1.00:0.92:1.37:1.59:1.15	34318	2-dehydropantoate 2-reductase [Caldalkalibacillus thermarum TA2.A1]
288	24	QZT32481.1	9.31	76	17	17	4610000000	9300000000	8300000000	9520000000	9160000000	2130000000	3970000000	3710000000	4240000000	4120000000	1.00:1.87:1.74:1.99:1.93	28907	dioxygenase [Caldalkalibacillus thermarum TA2.A1]
1032	455	QZT34683.1	9.26	39	5	5	19200000	17700000	26100000	22700000	28600000	13700000	12900000	18800000	17700000	19800000	1.00:0.94:1.38:1.29:1.45	25533	lactate utilization protein C [Caldalkalibacillus thermarum TA2.A1]
915	534	QZT34958.1	9.23	20	2	2	4810000	2800000	3080000	4570000	2510000	4810000	2800000	3080000	4570000	2510000	1.00:0.58:0.64:0.95:0.52	18222	transcriptional regulator NrdR [Caldalkalibacillus thermarum TA2.A1]
819	528	QZT35383.1	9.15	34	5	5	37900000	36000000	42000000	29900000	36100000	28700000	26300000	32700000	22600000	28200000	1.00:0.91:1.14:0.79:0.98	27906	polyprenyl synthetase family protein [Caldalkalibacillus thermarum TA2.A1]
1365	1495	QZT34581.1	9.09	16	2	2	316000	337000	773000	640000	304000	316000	337000	773000	640000	304000	1.00:1.07:2.45:2.03:0.96	20157	ribosomal protein S18-alanine N-acetyltransferase [Caldalkalibacillus thermarum TA2.A1]
135	833	QZT33472.1	9.04	45	23	23	68300000	79800000	82300000	88200000	88400000	17300000	21100000	23200000	22800000	23500000	1.00:1.22:1.34:1.32:1.36	66901	aspartate--tRNA ligase [Caldalkalibacillus thermarum TA2.A1]
71	408	QZT34669.1	8.84	63	22	22	376000000	254000000	345000000	334000000	379000000	122000000	76700000	139000000	119000000	136000000	1.00:0.63:1.14:0.98:1.11	56022	fumarate hydratase [Caldalkalibacillus thermarum TA2.A1]
1237	337	QZT32827.1	8.8	21	3	3	3330000	4730000	3830000	3860000	2820000	3330000	4730000	3830000	3860000	2820000	1.00:1.42:1.15:1.16:0.85	21580	signal peptidase I [Caldalkalibacillus thermarum TA2.A1]
323	1714	QZT32681.1	8.75	51	11	11	125000000	139000000	119000000	126000000	109000000	64500000	80700000	80300000	70900000	64200000	1.00:1.25:1.24:1.10:0.99	37451	tryptophan--tRNA ligase [Caldalkalibacillus thermarum TA2.A1]
660	2437	QZT33295.1	8.72	33	6	6	12900000	14900000	12300000	8190000	12000000	9700000	10700000	9590000	6690000	9430000	1.00:1.10:0.99:0.69:0.97	34238	ROK family glucokinase [Caldalkalibacillus thermarum TA2.A1]
820	726	QZT34323.1	8.69	48	4	4	107000000	117000000	185000000	290000000	167000000	90200000	94700000	154000000	251000000	134000000	1.00:1.05:1.71:2.78:1.49	11435	YbaB/EbfC family nucleoid-associated protein [Caldalkalibacillus thermarum TA2.A1]
359	124	QZT32814.1	8.68	60	11	11	131000000	140000000	137000000	115000000	165000000	64400000	69400000	69900000	54700000	75700000	1.00:1.08:1.09:0.85:1.18	26067	3-oxoacyl-[acyl-carrier-protein] reductase [Caldalkalibacillus thermarum TA2.A1]
594	429	QZT35328.1	8.62	36	9	9	21500000	23200000	43700000	27000000	21500000	13000000	13900000	25900000	16200000	12200000	1.00:1.07:2.00:1.24:0.94	36246	C40 family peptidase [Caldalkalibacillus thermarum TA2.A1]
794	584	QZT34920.1	8.61	6	2	2	1690000	2870000	3530000	1160000	2540000	1690000	2870000	3530000	1160000	2540000	1.00:1.70:2.09:0.68:1.50	40680	EAL domain-containing protein [Caldalkalibacillus thermarum TA2.A1]
1093	1367	QZT32678.1	8.54	17	2	2	1410000	554000	679000	1920000	1190000	1410000	554000	679000	1920000	1190000	1.00:0.39:0.48:1.36:0.84	30108	methylmalonyl-CoA epimerase [Caldalkalibacillus thermarum TA2.A1]
541	458	QZT32956.1	8.51	48	9	9	76200000	59400000	44900000	48100000	47300000	36000000	29100000	23500000	25100000	26300000	1.00:0.81:0.65:0.70:0.73	29434	TIGR00282 family metallophosphoesterase [Caldalkalibacillus thermarum TA2.A1]
6	122	QZT34414.1	8.49	50	52	52	577000000	585000000	609000000	569000000	552000000	79000000	80000000	88900000	87400000	77900000	1.00:1.01:1.13:1.11:0.99	135919	DNA-directed RNA polymerase subunit beta' [Caldalkalibacillus thermarum TA2.A1]
5	10	QZT34590.1	8.46	84	41	41	7030000000	8240000000	10100000000	10000000000	7240000000	1540000000	1740000000	2230000000	2030000000	1710000000	1.00:1.13:1.45:1.32:1.11	57489	chaperonin GroEL [Caldalkalibacillus thermarum TA2.A1]
733	290	QZT32961.1	8.46	21	4	4	23600000	17900000	12700000	15700000	23600000	21600000	15900000	11700000	14600000	22000000	1.00:0.73:0.54:0.68:1.02	31448	DUF3388 domain-containing protein [Caldalkalibacillus thermarum TA2.A1]
175	440	QZT33269.1	8.45	60	23	23	395000000	340000000	292000000	347000000	327000000	147000000	129000000	114000000	128000000	117000000	1.00:0.88:0.78:0.87:0.80	44223	ornithine--oxo-acid transaminase [Caldalkalibacillus thermarum TA2.A1]
1384	34268	QZT33794.1	8.42	23	3	3	164000000	137000000	166000000	148000000	133000000	164000000	137000000	166000000	148000000	133000000	1.00:0.84:1.01:0.90:0.81	14425	glycine cleavage system protein GcvH [Caldalkalibacillus thermarum TA2.A1]
763	821	QZT34244.1	8.41	37	6	6	42500000	43000000	49700000	43000000	36700000	31300000	32100000	37500000	31700000	27800000	1.00:1.03:1.20:1.01:0.89	25595	GNAT family N-acetyltransferase [Caldalkalibacillus thermarum TA2.A1]
1360	768	QZT35085.1	8.33	35	3	3	9730000	12600000	11500000	10500000	12700000	9730000	12600000	11500000	10500000	12700000	1.00:1.30:1.18:1.08:1.30	16336	transcriptional repressor [Caldalkalibacillus thermarum TA2.A1]
342	492	QZT34201.1	8.29	38	10	10	52100000	40500000	50700000	70000000	39300000	27600000	22500000	31900000	43700000	25900000	1.00:0.82:1.16:1.59:0.94	42170	acetyl-CoA C-acetyltransferase [Caldalkalibacillus thermarum TA2.A1]
1368	517	QZT34155.1	8.23	7	2	2	8450000	11300000	10100000	8570000	9620000	8450000	11300000	10100000	8570000	9620000	1.00:1.34:1.19:1.01:1.14	54595	NADH-quinone oxidoreductase subunit M [Caldalkalibacillus thermarum TA2.A1]
245	473	QZT33526.1	8.23	47	13	13	66600000	71800000	67400000	66400000	65100000	33300000	35100000	33500000	30400000	30000000	1.00:1.05:1.01:0.91:0.90	49107	bifunctional folylpolyglutamate synthase/dihydrofolate synthase [Caldalkalibacillus thermarum TA2.A1]
179	46	QZT33625.1	8.19	11	6	6	10500000	10800000	7560000	8050000	7790000	7770000	7470000	4790000	6030000	5730000	1.00:0.96:0.62:0.78:0.74	87886	endonuclease MutS2 [Caldalkalibacillus thermarum TA2.A1]
488	1532	QZT32990.1	8.18	26	6	6	21800000	28200000	25600000	13000000	16700000	19500000	23700000	21900000	12100000	14800000	1.00:1.21:1.12:0.62:0.76	42414	1-deoxy-D-xylulose-5-phosphate reductoisomerase [Caldalkalibacillus thermarum TA2.A1]
496	608	QZT33134.1	8.16	8	3	3	7070000	6770000	4440000	3380000	7420000	7070000	6770000	4440000	3380000	7420000	1.00:0.96:0.63:0.48:1.05	48052	nucleotidyltransferase [Caldalkalibacillus thermarum TA2.A1]
552	339	QZT32960.1	8.16	27	9	9	142000000	180000000	148000000	102000000	130000000	89600000	116000000	93100000	58600000	77400000	1.00:1.30:1.04:0.65:0.86	33256	DUF4115 domain-containing protein [Caldalkalibacillus thermarum TA2.A1]
1428	3299	QZT35468.1	8.09	16	2	2	2880000	2890000	1920000	2140000	1730000	2880000	2890000	1920000	2140000	1730000	1.00:1.00:0.67:0.74:0.60	19782	nodulation protein NfeD [Caldalkalibacillus thermarum TA2.A1]
572	105	QZT32715.1	8.01	20	5	5	15300000	15000000	15800000	17300000	26300000	11900000	11300000	12500000	13600000	19300000	1.00:0.95:1.05:1.14:1.62	43628	chorismate synthase [Caldalkalibacillus thermarum TA2.A1]
633	292	QZT34398.1	7.87	35	6	6	80100000	70200000	57300000	52100000	60300000	57600000	52600000	44100000	40300000	46700000	1.00:0.91:0.77:0.70:0.81	24324	serine O-acetyltransferase [Caldalkalibacillus thermarum TA2.A1]
628	886	QZT33602.1	7.82	18	4	4	3450000	3170000	2080000	2080000	3350000	2920000	2620000	1790000	1700000	2770000	1.00:0.90:0.61:0.58:0.95	33457	RimK family alpha-L-glutamate ligase [Caldalkalibacillus thermarum TA2.A1]
573	404	QZT34949.1	7.81	38	6	6	36200000	41100000	28200000	31700000	39400000	26000000	33100000	19900000	22700000	28500000	1.00:1.28:0.77:0.87:1.10	26521	response regulator transcription factor [Caldalkalibacillus thermarum TA2.A1]
1210	367	QZT34924.1	7.63	21	4	4	47000000	21500000	28000000	32400000	40400000	46400000	21200000	27600000	32200000	40200000	1.00:0.46:0.60:0.69:0.87	33845	glycine/betaine ABC transporter [Caldalkalibacillus thermarum TA2.A1]
307	320	QZT34178.1	7.62	78	13	13	172000000	193000000	143000000	133000000	102000000	68600000	82000000	58900000	58700000	52000000	1.00:1.19:0.86:0.86:0.76	23074	uracil phosphoribosyltransferase [Caldalkalibacillus thermarum TA2.A1]
439	387	QZT32994.1	7.58	44	11	11	125000000	145000000	100000000	95200000	103000000	69800000	76900000	57700000	56800000	57900000	1.00:1.10:0.83:0.81:0.83	25853	UMP kinase [Caldalkalibacillus thermarum TA2.A1]
782	264	QZT34450.1	7.57	11	3	3	1050000	1560000	2150000	1380000	1620000	1050000	1560000	2150000	1380000	1620000	1.00:1.49:2.04:1.32:1.54	30717	energy-coupling factor transporter ATPase [Caldalkalibacillus thermarum TA2.A1]
884	1786	QZT35452.1	7.45	47	4	4	157000000	140000000	134000000	119000000	153000000	131000000	110000000	116000000	99100000	126000000	1.00:0.84:0.89:0.76:0.96	13602	Asp23/Gls24 family envelope stress response protein [Caldalkalibacillus thermarum TA2.A1]
1082	3860	QZT33096.1	7.36	9	2	2	1960000	1580000	1810000	2350000	2550000	1960000	1580000	1810000	2350000	2550000	1.00:0.81:0.93:1.20:1.31	30095	RNA-binding protein [Caldalkalibacillus thermarum TA2.A1]
643	6882	QZT35472.1	7.34	30	6	6	82600000	135000000	137000000	93700000	122000000	64100000	107000000	106000000	68400000	88000000	1.00:1.67:1.65:1.07:1.37	25300	nucleotide exchange factor GrpE [Caldalkalibacillus thermarum TA2.A1]
1283	1267	QZT34044.1	7.22	9	2	2	1710000	1790000	902000	893000	1200000	1710000	1790000	902000	893000	1200000	1.00:1.05:0.53:0.52:0.70	32910	polysaccharide deacetylase family protein [Caldalkalibacillus thermarum TA2.A1]
696	788	QZT33352.1	7.2	45	9	9	103000000	111000000	114000000	129000000	88500000	51300000	58300000	55700000	60100000	43900000	1.00:1.14:1.08:1.17:0.86	23772	cyclase family protein [Caldalkalibacillus thermarum TA2.A1]
256	125	QZT33141.1	7.19	66	16	16	361000000	371000000	397000000	404000000	376000000	192000000	198000000	194000000	193000000	167000000	1.00:1.03:1.01:1.01:0.87	27310	response regulator transcription factor [Caldalkalibacillus thermarum TA2.A1]
446	1000	QZT34291.1	7.18	36	11	11	33700000	37600000	43200000	43400000	50300000	23400000	25800000	29400000	28400000	31200000	1.00:1.10:1.26:1.21:1.33	51360	tRNA uridine-5-carboxymethylaminomethyl(34) synthesis GTPase MnmE [Caldalkalibacillus thermarum TA2.A1]
425	155	QZT34145.1	7.15	45	13	13	156000000	208000000	235000000	166000000	134000000	73600000	102000000	122000000	74500000	61300000	1.00:1.39:1.65:1.01:0.83	35665	rod shape-determining protein [Caldalkalibacillus thermarum TA2.A1]
222	34	QZT35525.1	7.13	46	17	17	134000000	147000000	114000000	84000000	105000000	43000000	49100000	42600000	35800000	40900000	1.00:1.14:0.99:0.83:0.95	52718	protoporphyrinogen oxidase [Caldalkalibacillus thermarum TA2.A1]
445	332	QZT33373.1	7.07	3	2	2	810000	529000	538000	307000	342000	810000	529000	538000	307000	342000	1.00:0.65:0.66:0.38:0.42	81558	HDIG domain-containing protein [Caldalkalibacillus thermarum TA2.A1]
727	3880	QZT34118.1	7.05	17	4	4	14300000	11500000	16700000	16100000	10700000	14100000	11300000	15600000	14600000	10100000	1.00:0.80:1.11:1.04:0.72	44050	aminotransferase class I/II-fold pyridoxal phosphate-dependent enzyme [Caldalkalibacillus thermarum TA2.A1]
685	3152	QZT34216.1	7.05	4	2	2	1370000	2190000	1830000	1280000	1130000	1370000	2190000	1830000	1280000	1130000	1.00:1.60:1.33:0.93:0.82	52964	HD domain-containing protein [Caldalkalibacillus thermarum TA2.A1]
410	54	QZT34389.1	7.04	53	13	13	201000000	179000000	188000000	181000000	144000000	89700000	78200000	82000000	75500000	60800000	1.00:0.87:0.91:0.84:0.68	39916	protein arginine kinase [Caldalkalibacillus thermarum TA2.A1]
672	258	QZT34453.1	6.98	43	4	4	70400000	61700000	46400000	41400000	46000000	66700000	58900000	41700000	37400000	40800000	1.00:0.88:0.62:0.56:0.61	16151	50S ribosomal protein L13 [Caldalkalibacillus thermarum TA2.A1]
1201	859	QZT34956.1	6.98	16	2	2	11700000	12500000	12100000	14100000	10700000	11700000	12500000	12100000	14100000	10700000	1.00:1.07:1.04:1.21:0.92	15350	cytosolic protein [Caldalkalibacillus thermarum TA2.A1]
869	372	QZT32753.1	6.98	16	3	3	8350000	10100000	9890000	9410000	11300000	8350000	10100000	9890000	9410000	11300000	1.00:1.21:1.18:1.13:1.35	25313	endonuclease III [Caldalkalibacillus thermarum TA2.A1]
131	1164	QZT33358.1	6.92	77	18	18	435000000	456000000	435000000	404000000	302000000	190000000	210000000	218000000	209000000	156000000	1.00:1.11:1.14:1.10:0.82	40726	Nif3-like dinuclear metal center hexameric protein [Caldalkalibacillus thermarum TA2.A1]
1024	697	QZT34265.1	6.81	24	3	3	9820000	9950000	10700000	11100000	6970000	9820000	9950000	10700000	11100000	6970000	1.00:1.01:1.09:1.13:0.71	16471	single-stranded DNA-binding protein [Caldalkalibacillus thermarum TA2.A1]
479	164	QZT34792.1	6.76	60	14	14	281000000	206000000	221000000	188000000	258000000	127000000	98700000	104000000	88900000	111000000	1.00:0.78:0.82:0.70:0.88	35488	acryloyl-CoA reductase [Caldalkalibacillus thermarum TA2.A1]
984	525	QZT34430.1	6.69	27	4	4	98700000	89300000	72500000	60200000	77300000	85600000	77900000	60100000	51900000	64800000	1.00:0.91:0.70:0.61:0.76	13358	50S ribosomal protein L14 [Caldalkalibacillus thermarum TA2.A1]
518	454	QZT33912.1	6.45	24	4	4	27000000	20100000	15900000	17300000	10000000	25100000	18500000	14700000	16700000	9690000	1.00:0.74:0.59:0.67:0.39	25970	cell division ATP-binding protein FtsE [Caldalkalibacillus thermarum TA2.A1]
825	3381	QZT35500.1	6.43	19	4	4	5080000	5970000	6430000	7520000	6190000	3670000	4250000	4440000	5110000	4360000	1.00:1.16:1.21:1.39:1.19	28274	Fic family protein [Caldalkalibacillus thermarum TA2.A1]
328	427	QZT34634.1	6.41	29	11	11	20500000	21400000	19400000	16600000	14900000	10100000	10500000	9780000	8610000	7260000	1.00:1.04:0.97:0.85:0.72	65212	amidohydrolase family protein [Caldalkalibacillus thermarum TA2.A1]
790	565	QZT32664.1	6.35	17	4	4	9110000	11800000	11400000	12700000	14500000	8740000	11400000	11000000	12400000	14200000	1.00:1.30:1.26:1.42:1.62	30174	sporulation transcription factor Spo0A [Caldalkalibacillus thermarum TA2.A1]
369	4002	QZT35288.1	6.35	5	3	3	4390000	3270000	3490000	1640000	2770000	4390000	3270000	3490000	1640000	2770000	1.00:0.74:0.79:0.37:0.63	82509	RNA-binding transcriptional accessory protein [Caldalkalibacillus thermarum TA2.A1]
1125	476	QZT34449.1	6.3	27	3	3	40000000	35100000	30100000	30700000	25200000	40000000	35100000	30100000	30700000	25200000	1.00:0.88:0.75:0.77:0.63	13588	50S ribosomal protein L17 [Caldalkalibacillus thermarum TA2.A1]
902	12954	QZT32692.1	6.25	29	3	3	13000000	10300000	6010000	8590000	7930000	13000000	10300000	6010000	8590000	7930000	1.00:0.79:0.46:0.66:0.61	21092	shikimate kinase [Caldalkalibacillus thermarum TA2.A1]
1103	6757	QZT34425.1	6.11	55	6	6	157000000	134000000	84400000	72400000	93300000	116000000	97300000	61000000	56800000	69700000	1.00:0.84:0.52:0.49:0.60	12686	50S ribosomal protein L22 [Caldalkalibacillus thermarum TA2.A1]
831	725	QZT32638.1	6.11	17	3	3	2650000	5600000	5390000	2940000	3960000	2650000	5600000	5390000	2940000	3960000	1.00:2.11:2.03:1.11:1.49	36865	DUF1385 domain-containing protein [Caldalkalibacillus thermarum TA2.A1]
613	1501	QZT33098.1	5.99	63	8	8	115000000	128000000	127000000	162000000	100000000	88100000	96300000	93800000	116000000	74200000	1.00:1.09:1.06:1.32:0.84	26020	YggS family pyridoxal phosphate-dependent enzyme [Caldalkalibacillus thermarum TA2.A1]
661	99	QZT33805.1	5.93	34	7	7	583000000	711000000	689000000	613000000	633000000	303000000	384000000	426000000	373000000	372000000	1.00:1.27:1.41:1.23:1.23	37013	ABC transporter substrate-binding protein [Caldalkalibacillus thermarum TA2.A1]
991	3621	QZT32584.1	5.89	8	2	2	774000	763000	241000	408000	946000	774000	763000	241000	408000	946000	1.00:0.99:0.31:0.53:1.22	37496	LacI family transcriptional regulator [Caldalkalibacillus thermarum TA2.A1]
712	328	QZT34321.1	5.84	11	3	3	6540000	4230000	6910000	7050000	7210000	6540000	4230000	6910000	7050000	7210000	1.00:0.65:1.06:1.08:1.10	40558	PAS domain S-box protein [Caldalkalibacillus thermarum TA2.A1]
162	21	QZT33345.1	5.74	57	17	17	1330000000	1270000000	947000000	1120000000	1110000000	518000000	505000000	400000000	456000000	460000000	1.00:0.97:0.77:0.88:0.89	35866	alpha-ketoacid dehydrogenase subunit beta [Caldalkalibacillus thermarum TA2.A1]
987	2617	QZT34556.1	5.59	9	2	2	3850000	2890000	4300000	3810000	1960000	3850000	2890000	4300000	3810000	1960000	1.00:0.75:1.12:0.99:0.51	30433	RNA polymerase sigma factor SigB [Caldalkalibacillus thermarum TA2.A1]
555	210	QZT34965.1	5.55	22	5	5	17400000	23700000	20200000	18000000	18700000	14900000	19900000	16200000	14900000	15300000	1.00:1.33:1.09:1.00:1.03	34855	ABC transporter ATP-binding protein [Caldalkalibacillus thermarum TA2.A1]
562	1120	QZT32618.1	5.54	30	5	5	32100000	30300000	35300000	27700000	33600000	27800000	26200000	30400000	22800000	26400000	1.00:0.94:1.09:0.82:0.95	35800	asparaginase [Caldalkalibacillus thermarum TA2.A1]
109	1653	QZT33365.1	5.48	36	23	23	93400000	93100000	79900000	71700000	74300000	25700000	26200000	24700000	22400000	22800000	1.00:1.02:0.96:0.87:0.89	79892	glycine--tRNA ligase subunit beta [Caldalkalibacillus thermarum TA2.A1]
176	7	QZT34202.1	5.45	31	15	15	49500000	33700000	36400000	49900000	43200000	21000000	15200000	15800000	19000000	18800000	1.00:0.72:0.75:0.90:0.90	80938	4Fe-4S dicluster domain-containing protein [Caldalkalibacillus thermarum TA2.A1]
411	785	QZT34289.1	5.39	56	10	10	52700000	45900000	43600000	45700000	36800000	24700000	24300000	24000000	27100000	21200000	1.00:0.98:0.97:1.10:0.86	27251	16S rRNA (guanine(527)-N(7))-methyltransferase RsmG [Caldalkalibacillus thermarum TA2.A1]
693	366	QZT34395.1	5.33	18	6	6	38600000	35200000	34100000	35600000	41200000	34800000	30800000	28500000	29500000	34700000	1.00:0.88:0.82:0.85:1.00	40176	PIN/TRAM domain-containing protein [Caldalkalibacillus thermarum TA2.A1]
110	2392	QZT34639.1	5.3	35	19	19	75600000	78200000	54200000	62400000	61100000	29500000	31500000	23100000	33900000	28400000	1.00:1.07:0.78:1.15:0.96	75171	NAD-dependent DNA ligase LigA [Caldalkalibacillus thermarum TA2.A1]
821	2286	QZT33186.1	5.28	8	2	2	2180000	2180000	2080000	1990000	2730000	2180000	2180000	2080000	1990000	2730000	1.00:1.00:0.95:0.91:1.25	54419	aminotransferase class I/II-fold pyridoxal phosphate-dependent enzyme [Caldalkalibacillus thermarum TA2.A1]
70	211	QZT34653.1	5.27	63	22	22	349000000	378000000	360000000	356000000	306000000	129000000	136000000	137000000	130000000	124000000	1.00:1.05:1.06:1.00:0.96	52927	Asp-tRNA(Asn)/Glu-tRNA(Gln) amidotransferase subunit GatA [Caldalkalibacillus thermarum TA2.A1]
1509	34166	QZT35161.1	5.15	56	2	2	6140000	7260000	7180000	11400000	5910000	6140000	7260000	7180000	11400000	5910000	1.00:1.18:1.17:1.86:0.96	5913	hypothetical protein HUR95_08115 [Caldalkalibacillus thermarum TA2.A1]
481	538	QZT33476.1	5.12	6	3	3	3330000	4330000	2820000	3210000	3800000	3330000	4330000	2820000	3210000	3800000	1.00:1.30:0.85:0.96:1.14	83232	bifunctional (p)ppGpp synthetase/guanosine-3' 5'-bis(diphosphate) 3'-pyrophosphohydrolase [Caldalkalibacillus thermarum TA2.A1]
357	851	QZT33487.1	5.1	40	9	9	44900000	58700000	68900000	50400000	68200000	23700000	27100000	33000000	23900000	30700000	1.00:1.14:1.39:1.01:1.29	42990	tRNA guanosine(34) transglycosylase Tgt [Caldalkalibacillus thermarum TA2.A1]
627	456	QZT32523.1	5.07	21	8	7	7070000	5650000	7870000	6990000	7570000	4330000	3460000	4880000	4400000	4500000	1.00:0.80:1.13:1.02:1.04	53013	RsmB/NOP family class I SAM-dependent RNA methyltransferase [Caldalkalibacillus thermarum TA2.A1]
464	126	QZT33314.1	4.95	25	9	9	46900000	60300000	45900000	52200000	37400000	24300000	27200000	26200000	26900000	22100000	1.00:1.12:1.08:1.11:0.91	39108	GTP 3' 8-cyclase MoaA [Caldalkalibacillus thermarum TA2.A1]
100	1077	QZT34399.1	4.92	52	20	20	226000000	217000000	261000000	239000000	199000000	71000000	70300000	88800000	82400000	70900000	1.00:0.99:1.25:1.16:1.00	52689	cysteine--tRNA ligase [Caldalkalibacillus thermarum TA2.A1]
800	378	QZT34287.1	4.82	24	5	5	15200000	17600000	21100000	13200000	16500000	14100000	16500000	18600000	11600000	14900000	1.00:1.17:1.31:0.82:1.06	28109	AAA family ATPase [Caldalkalibacillus thermarum TA2.A1]
126	26	QZT33143.1	4.81	32	13	13	161000000	213000000	193000000	153000000	155000000	85100000	111000000	106000000	83100000	84100000	1.00:1.31:1.25:0.98:0.99	61568	cytochrome c biogenesis protein ResB [Caldalkalibacillus thermarum TA2.A1]
834	560	QZT33489.1	4.6	19	4	4	5480000	8020000	7050000	9640000	5820000	4330000	6780000	6280000	8630000	5650000	1.00:1.57:1.45:1.99:1.31	37651	Holliday junction branch migration DNA helicase RuvB [Caldalkalibacillus thermarum TA2.A1]
886	251	QZT34451.1	4.52	8	2	2	1310000	1350000	1970000	1030000	2180000	1310000	1350000	1970000	1030000	2180000	1.00:1.04:1.51:0.79:1.67	32540	energy-coupling factor transporter ATPase [Caldalkalibacillus thermarum TA2.A1]
418	140	QZT33499.1	4.45	22	6	6	12800000	12600000	10400000	11200000	11400000	10300000	9870000	7610000	9250000	9010000	1.00:0.95:0.74:0.89:0.87	47334	GTPase ObgE [Caldalkalibacillus thermarum TA2.A1]
388	180	QZT34311.1	4.36	39	13	13	66200000	63500000	72900000	71300000	71900000	29300000	27000000	37000000	35100000	36300000	1.00:0.92:1.26:1.20:1.24	49008	D-alanyl-D-alanine carboxypeptidase [Caldalkalibacillus thermarum TA2.A1]
260	3292	QZT33733.1	4.34	62	20	20	209000000	210000000	219000000	215000000	227000000	92200000	94900000	89800000	85000000	82600000	1.00:1.03:0.97:0.92:0.90	41188	bifunctional cystathionine gamma-lyase/homocysteine desulfhydrase [Caldalkalibacillus thermarum TA2.A1]
1088	3865	QZT33480.1	4.22	12	3	3	10900000	12400000	9170000	9260000	10900000	10900000	12400000	9170000	9260000	10900000	1.00:1.14:0.84:0.85:1.00	34564	protein translocase subunit SecF [Caldalkalibacillus thermarum TA2.A1]
724	469	QZT35510.1	4.14	21	4	4	10300000	9570000	25900000	22400000	15500000	9740000	9470000	24900000	22100000	15000000	1.00:0.97:2.55:2.27:1.54	35370	U32 family peptidase [Caldalkalibacillus thermarum TA2.A1]
522	363	QZT34356.1	4.07	78	7	7	2000000000	1730000000	1910000000	2460000000	2160000000	1550000000	1430000000	1460000000	1710000000	1500000000	1.00:0.92:0.94:1.10:0.97	9852	HU family DNA-binding protein [Caldalkalibacillus thermarum TA2.A1]
700	289	QZT34349.1	4	63	9	9	114000000	107000000	143000000	190000000	116000000	71300000	67800000	94500000	121000000	72500000	1.00:0.95:1.33:1.70:1.02	21509	aminoacyl-tRNA hydrolase [Caldalkalibacillus thermarum TA2.A1]
294	2555	QZT33356.1	3.99	61	11	11	164000000	205000000	218000000	242000000	208000000	81300000	105000000	114000000	120000000	103000000	1.00:1.29:1.40:1.47:1.27	35602	4-hydroxy-3-methylbut-2-enyl diphosphate reductase [Caldalkalibacillus thermarum TA2.A1]
2	4	QZT34390.1	3.99	65	46	46	1210000000	1200000000	1360000000	1370000000	1240000000	221000000	228000000	238000000	273000000	247000000	1.00:1.03:1.08:1.24:1.12	90911	ATP-dependent protease ATP-binding subunit ClpC [Caldalkalibacillus thermarum TA2.A1]
420	939	QZT33737.1	3.76	45	10	10	65600000	72400000	90500000	70600000	74900000	39000000	43700000	43500000	34400000	42400000	1.00:1.12:1.12:0.88:1.09	29471	TIGR01457 family HAD-type hydrolase [Caldalkalibacillus thermarum TA2.A1]
992	4026	QZT33513.1	3.72	23	4	4	4490000	5330000	3910000	3850000	3360000	3360000	4610000	3420000	3420000	3220000	1.00:1.37:1.02:1.02:0.96	21682	Maf family protein [Caldalkalibacillus thermarum TA2.A1]
1008	396	QZT33537.1	3.64	32	4	4	2930000	2350000	3770000	3040000	4340000	2670000	2090000	3400000	2850000	3970000	1.00:0.78:1.27:1.07:1.49	24069	ribosome biogenesis GTP-binding protein YihA/YsxC [Caldalkalibacillus thermarum TA2.A1]
383	239	QZT34298.1	3.62	27	8	8	17000000	16000000	17600000	12400000	17400000	9860000	10200000	9890000	8160000	9710000	1.00:1.03:1.00:0.83:0.98	51718	chromosomal replication initiator protein DnaA [Caldalkalibacillus thermarum TA2.A1]
718	236	QZT33469.1	3.6	56	7	7	95700000	111000000	72200000	121000000	107000000	78600000	91300000	60600000	97500000	87300000	1.00:1.16:0.77:1.24:1.11	15722	Rrf2 family transcriptional regulator [Caldalkalibacillus thermarum TA2.A1]
1302	1147	QZT32501.1	3.54	31	4	4	5430000	5500000	6370000	7850000	4980000	5020000	4940000	5690000	6520000	4360000	1.00:0.98:1.13:1.30:0.87	13509	DUF4387 domain-containing protein [Caldalkalibacillus thermarum TA2.A1]
351	3768	QZT33913.1	3.2	49	13	13	67900000	64400000	64800000	63200000	52300000	26700000	26900000	27000000	25600000	23400000	1.00:1.01:1.01:0.96:0.88	37253	YpdA family putative bacillithiol disulfide reductase [Caldalkalibacillus thermarum TA2.A1]
787	19068	QZT34378.1	3.18	58	7	7	18000000	22200000	20500000	29700000	20800000	12800000	15100000	13700000	19900000	13600000	1.00:1.18:1.07:1.55:1.06	17832	transcription elongation factor GreA [Caldalkalibacillus thermarum TA2.A1]
1243	2565	QZT34968.1	3.06	10	2	2	5000000	6650000	6490000	8980000	7170000	5000000	6650000	6490000	8980000	7170000	1.00:1.33:1.30:1.80:1.43	43163	NupC/NupG family nucleoside CNT transporter [Caldalkalibacillus thermarum TA2.A1]
310	3723	QZT32918.1	3.05	79	16	16	410000000	426000000	361000000	340000000	383000000	189000000	191000000	170000000	168000000	186000000	1.00:1.01:0.90:0.89:0.98	29293	pyridoxine/pyridoxal/pyridoxamine kinase [Caldalkalibacillus thermarum TA2.A1]
287	969	QZT33155.1	3	37	12	12	31800000	36400000	34400000	39500000	39000000	16700000	19000000	16100000	18500000	16000000	1.00:1.14:0.96:1.11:0.96	48854	diaminopimelate decarboxylase [Caldalkalibacillus thermarum TA2.A1]
589	2693	QZT35149.1	2.92	23	6	6	4910000	5390000	4370000	6290000	7250000	3630000	3900000	3050000	4210000	4580000	1.00:1.07:0.84:1.16:1.26	51357	amidase [Caldalkalibacillus thermarum TA2.A1]
1151	988	QZT34072.1	2.76	40	4	4	9580000	7490000	4960000	6180000	6480000	8620000	6700000	4310000	5390000	5590000	1.00:0.78:0.50:0.63:0.65	16869	Lrp/AsnC family transcriptional regulator [Caldalkalibacillus thermarum TA2.A1]
1137	654	QZT33396.1	2.75	21	3	3	3520000	3540000	2870000	2060000	2190000	3520000	3540000	2870000	2060000	2190000	1.00:1.00:0.82:0.58:0.62	28568	16S rRNA (uracil(1498)-N(3))-methyltransferase [Caldalkalibacillus thermarum TA2.A1]
391	61	QZT34432.1	2.65	58	13	13	437000000	413000000	379000000	357000000	335000000	217000000	202000000	200000000	185000000	165000000	1.00:0.93:0.93:0.85:0.76	20297	50S ribosomal protein L5 [Caldalkalibacillus thermarum TA2.A1]
1011	173	QZT33511.1	2.59	8	2	2	1130000	1570000	1690000	1470000	1380000	1130000	1570000	1690000	1470000	1380000	1.00:1.39:1.49:1.30:1.21	33196	rod shape-determining protein MreC [Caldalkalibacillus thermarum TA2.A1]
140	459	QZT33636.1	2.55	51	14	14	834000000	882000000	770000000	790000000	869000000	351000000	364000000	310000000	307000000	307000000	1.00:1.04:0.88:0.87:0.88	36877	NAD(P)/FAD-dependent oxidoreductase [Caldalkalibacillus thermarum TA2.A1]
545	57	QZT33785.1	2.47	15	5	5	7690000	5710000	6180000	5970000	6710000	6030000	4540000	4960000	5070000	5650000	1.00:0.75:0.82:0.84:0.94	50694	sugar ABC transporter substrate-binding protein [Caldalkalibacillus thermarum TA2.A1]
1101	9802	QZT34579.1	2.43	32	3	3	10600000	8260000	4680000	7410000	5540000	10600000	8260000	4680000	7410000	5540000	1.00:0.78:0.44:0.70:0.52	17296	tRNA (adenosine(37)-N6)-threonylcarbamoyltransferase complex ATPase subunit type 1 TsaE [Caldalkalibacillus thermarum TA2.A1]
677	1541	QZT34140.1	2.37	36	7	7	140000000	144000000	172000000	170000000	119000000	94500000	103000000	137000000	126000000	87900000	1.00:1.09:1.45:1.34:0.93	15946	3-hydroxyacyl-ACP dehydratase FabZ [Caldalkalibacillus thermarum TA2.A1]
739	59	QZT34352.1	2.3	37	7	7	14800000	12900000	10400000	15200000	13500000	10700000	9470000	8830000	12300000	11300000	1.00:0.89:0.83:1.16:1.06	38127	peptidylprolyl isomerase [Caldalkalibacillus thermarum TA2.A1]
619	174	QZT34437.1	2.24	56	8	8	183000000	179000000	183000000	171000000	146000000	113000000	104000000	113000000	111000000	93600000	1.00:0.92:1.00:0.98:0.83	17496	30S ribosomal protein S5 [Caldalkalibacillus thermarum TA2.A1]
637	620	QZT34180.1	2.23	52	6	6	61500000	72500000	74400000	69000000	66600000	48500000	56600000	56200000	49700000	50100000	1.00:1.17:1.16:1.02:1.03	20140	TIGR01440 family protein [Caldalkalibacillus thermarum TA2.A1]
284	151	QZT34079.1	2.22	71	17	17	305000000	287000000	318000000	250000000	331000000	111000000	109000000	144000000	128000000	138000000	1.00:0.99:1.30:1.15:1.25	34734	carbohydrate kinase [Caldalkalibacillus thermarum TA2.A1]
1001	852	QZT34062.1	2.12	34	4	4	62600000	60100000	87400000	93200000	64200000	51300000	50600000	75700000	80500000	54600000	1.00:0.99:1.47:1.57:1.06	15186	nucleotidyltransferase domain-containing protein [Caldalkalibacillus thermarum TA2.A1]
184	177	QZT35419.1	2.06	34	15	14	98900000	96700000	79000000	79900000	103000000	49300000	53800000	43600000	41800000	50600000	1.00:1.09:0.88:0.85:1.03	57952	ribonuclease Y [Caldalkalibacillus thermarum TA2.A1]
502	441	QZT34346.1	1.96	37	10	10	56200000	54600000	67000000	67700000	70100000	31600000	30500000	32200000	34300000	35200000	1.00:0.97:1.02:1.09:1.11	51402	bifunctional UDP-N-acetylglucosamine diphosphorylase/glucosamine-1-phosphate N-acetyltransferase GlmU [Caldalkalibacillus thermarum TA2.A1]
1018	288	QZT34521.1	1.93	17	5	5	7990000	7520000	9760000	9950000	9720000	5930000	5520000	6930000	6880000	6370000	1.00:0.93:1.17:1.16:1.07	33703	ABC transporter ATP-binding protein [Caldalkalibacillus thermarum TA2.A1]
1031	12779	QZT33872.1	1.87	22	4	4	6710000	5830000	7430000	7280000	6680000	6620000	5710000	7300000	7110000	6470000	1.00:0.86:1.10:1.07:0.98	23481	flavin reductase family protein [Caldalkalibacillus thermarum TA2.A1]
850	2526	QZT35374.1	1.75	6	3	3	1210000	1050000	1040000	1250000	939000	1210000	1050000	1040000	1250000	939000	1.00:0.87:0.86:1.04:0.78	78822	amylo-alpha-1 6-glucosidase [Caldalkalibacillus thermarum TA2.A1]
659	6925	QZT34213.1	1.65	17	4	4	11200000	10700000	12700000	11100000	11300000	11000000	10400000	12300000	10700000	10700000	1.00:0.94:1.12:0.97:0.97	31410	polyamine aminopropyltransferase [Caldalkalibacillus thermarum TA2.A1]
691	3286	QZT34344.1	1.53	32	7	7	27700000	28700000	26900000	23000000	24800000	18100000	18600000	18700000	16900000	18800000	1.00:1.03:1.03:0.94:1.04	30740	pur operon repressor [Caldalkalibacillus thermarum TA2.A1]
852	2161	QZT32739.1	1.49	14	2	2	2260000	3320000	4530000	4060000	6930000	2260000	3320000	4530000	4060000	6930000	1.00:1.47:2.00:1.79:3.06	36338	biotin--[acetyl-CoA-carboxylase] ligase [Caldalkalibacillus thermarum TA2.A1]
50	308	QZT34946.1	1.4	73	23	23	783000000	757000000	1110000000	1040000000	1110000000	308000000	306000000	352000000	305000000	312000000	1.00:0.99:1.14:0.99:1.01	41285	citrate synthase [Caldalkalibacillus thermarum TA2.A1]
930	369	QZT34059.1	1.19	8	2	2	4990000	4920000	5060000	5120000	4740000	4990000	4920000	5060000	5120000	4740000	1.00:0.98:1.01:1.03:0.95	34277	LCP family protein [Caldalkalibacillus thermarum TA2.A1]
1590	6818	QZT35214.1	1.07	22	2	2	8240000	7570000	7000000	6480000	7670000	8240000	7570000	7000000	6480000	7670000	1.00:0.92:0.85:0.79:0.93	17326	copper resistance protein CopC [Caldalkalibacillus thermarum TA2.A1]
386	710	QZT34441.1	1.03	65	10	10	334000000	339000000	300000000	330000000	274000000	193000000	197000000	177000000	188000000	151000000	1.00:1.02:0.92:0.97:0.78	24113	adenylate kinase [Caldalkalibacillus thermarum TA2.A1]
697	416	QZT33481.1	0.99	25	8	8	46200000	44100000	39400000	41000000	40200000	29300000	27400000	24000000	26900000	25400000	1.00:0.94:0.82:0.92:0.87	47499	protein translocase subunit SecD [Caldalkalibacillus thermarum TA2.A1]
919	1179	QZT33695.1	0.9	39	5	3	5880000	6330000	5090000	5830000	5900000	5340000	5650000	4540000	5280000	5410000	1.00:1.06:0.85:0.99:1.01	20121	thymidine kinase [Caldalkalibacillus thermarum TA2.A1]
642	3859	QZT33477.1	0.81	68	9	9	101000000	113000000	113000000	130000000	166000000	77200000	85200000	81000000	95800000	121000000	1.00:1.10:1.05:1.24:1.56	18715	adenine phosphoribosyltransferase [Caldalkalibacillus thermarum TA2.A1]
622	3573	QZT34225.1	0.75	30	6	6	25600000	30800000	24300000	35200000	28900000	19100000	22400000	18700000	23800000	21300000	1.00:1.17:0.98:1.25:1.11	28282	glucosamine-6-phosphate deaminase [Caldalkalibacillus thermarum TA2.A1]
574	334	QZT34286.1	0.7	27	6	6	19900000	20400000	20000000	17200000	16700000	12900000	15300000	14700000	13100000	12400000	1.00:1.19:1.14:1.01:0.96	31978	ParB/RepB/Spo0J family partition protein [Caldalkalibacillus thermarum TA2.A1]
1079	705	QZT33415.1	0.7	58	6	6	41600000	44000000	34900000	40500000	37800000	33300000	34700000	28000000	32900000	31600000	1.00:1.04:0.84:0.99:0.95	13236	ribosome silencing factor [Caldalkalibacillus thermarum TA2.A1]
703	3999	QZT34119.1	0.59	16	4	4	16600000	13800000	20800000	18800000	17900000	12900000	11200000	15200000	14700000	13100000	1.00:0.87:1.18:1.14:1.02	21550	cysteine hydrolase [Caldalkalibacillus thermarum TA2.A1]
728	6589	QZT33312.1	0.17	45	7	7	46800000	55600000	40500000	48700000	51700000	34600000	42700000	33600000	36300000	39100000	1.00:1.23:0.97:1.05:1.13	24226	5-formyltetrahydrofolate cyclo-ligase [Caldalkalibacillus thermarum TA2.A1]
1425	699	QZT32754.1	0.16	36	2	2	6280000	5050000	4410000	7070000	4620000	6280000	5050000	4410000	7070000	4620000	1.00:0.80:0.70:1.13:0.74	15327	hypothetical protein HUR95_10200 [Caldalkalibacillus thermarum TA2.A1]
